# Supplementary material for: Imposing multireaction dependencies provides an innovative strategy to alter metabolic functions
Source: Research Square preprint supplement (doi:10.21203/rs.3.rs-6304455/v1), 2025-04-15
Supplement: Supplementary file 1 [file 0b772396be7c06e3b182417e.xlsx]

## Sheet: A - complexes
Supplementary Table S4A. Candidate complexes whose balancing is lethal in cancerous tissue, but not in healthy tissue and whose concordance module does not include essential reactions in the cancer model. We suggest that, these complexes can be balanced by transporter engineering. Therefore, complexes that contain a metabolite already exchanged with the environment are ecluded from the presented …
Compartment abreviations: Cytoplasm - [c], Extracellular - [e], Golgi - [g], Lysosome - [l], Mitochondria - [m], Nucleus - [n], Endoplasmic reticulum - [r], Peroxisome - [x]
breast	gastric	kidney	blood	liver (HCC)	lung (SCC)	lung (AC)	ovarian	pancreas
'0.1*dolichyl phosphate(2-)+ 1*UDP-N-acetyl-alpha-D-glucosamine(2-)'	'1*Bicarbonate+1*Reduced glutathione+1*leukotriene C4(2-)'	'0.1*Dolichyl phosphate D-mannose, human liver homolog+ 1*phosphoethanolaminyl-mannosyl-glucosylaminyl-acylphosphatidylinositol (H5)'	'1*ADP+1*3-Phospho-D-glyceroyl phosphate'	'1*13-cis-retinoate+1*UDP-D-glucuronate'	'0.1*Dolichyl phosphate D-mannose, human uterine homolog+ 1*glucosaminyl-acylphosphatidylinositol'	'1*cis-aconitate(3-)+1*oxalate(2-)'	1*13-cis-retinoate'	'1*2-methyl-3-oxopropanoate+1*L-glutamate(1-)'
'1*10-formyltetrahydrofolate-[Glu](5)'	'1*all-trans-retinoate'	'1*10-formyltetrahydrofolate-[Glu](6)'	'1*GTP+1*Reduced thioredoxin'	'1*3-Phospho-D-glyceroyl phosphate'	'0.1*dolichyl phosphate(2-)+ 1*UDP-N-acetyl-alpha-D-glucosamine(2-)'	'1*acetate+1*Oxaloacetate'	'1*calcidiol'	'1*3-methyl-2-oxobutanoate'
'1*10-formyltetrahydrofolate-[Glu](5)+4*water'		'1*trimethylenediaminium+1*H2O+1*O2'	'1*H2O+1*dGMP'	'1*2-Deoxy-D-ribose 1-phosphate'	'1*10-formyltetrahydrofolate-[Glu](6)'	'1*ADP+1*proton+1*hydrogenphosphate+1*glutathionate(1-)'	'1*2-methyl-3-oxopropanoate+1*L-glutamate(1-)'	'1*3-Phospho-D-glycerate'
'1*pentaglutamyl folate (THF)'		'1*4-Aminobutanoate'	'1*proton+1*phosphatidate(2-)+1*L-serine'	'1*2-methylcrotonoyl-CoA(4-)+1*Ubiquinol-10'	'1*10-formyltetrahydrofolate(2-)+4*L-glutamate(1-)+1*ATP(4-)'	'1*S-Adenosyl-L-homocysteine'	'1*3-methyl-2-oxobutanoate'	'1*4-methyl-2-oxopentanoate'
'1*ADP+1*dUTP'		'1*pentaglutamyl folate (THF)'	'1*Nicotinamide adenine dinucleotide phosphate+1*5,6,7,8-Tetrahydrofolate'	'1*2-methylbutanoyl-CoA(4-)+1*ubiquinone-10'	'1*2-Deoxy-D-ribose 1-phosphate+1*Guanine'	'1*arachidonate'	'1*quinonoid dihydrobiopterin'	'1*trans,cis-Lauro-2,6-dienoyl-CoA'
'1*2-Oxoglutarate+1*beta-alanine'		1*hexaglutamyl folate (DHF)'		'1*2-methyl-3-oxopropanoate+1*L-alanine'	'1*N-[(R)-pantothenoyl]-L-cysteinate'	'1*arachidonate+1*(R)-carnitine'	'1*ADP+1*dCDP'	'1*Acetoacetyl-CoA+1*AMP+1*Diphosphate'
'1*2-Oxoglutarate+1*L-alanine'		'1*hexaglutamyl folate (THF)'		'1*2-methyl-3-oxopropanoate+1*L-glutamate(1-)'	'1*N-[(R)-pantothenoyl]-L-cysteinate'	'1*L-aspartate(1-)'	'1*ADP+1*dTTP'	'1*N-acetyl-D-glucosamine 6-phosphate(2-)'
'1*2-Oxoglutarate+1*L-valine'		'1*R total 2 position'		'1*3-Phospho-D-glycerate'	'1*(S)-3-Hydroxydodecanoyl-CoA'	'1*ATP(4-)+1*1-phosphatidyl-1D-myo-inositol 3-phosphate(3-)'	'1*ADP+1*ITP(3-)'	'1*Adenine+1*5-Phospho-alpha-D-ribose 1-diphosphate'
'1*D-alanine'		'1*ADP+1*UDP'		'1*4-Aminobutanoate'	'1*ADP+1*dADP'	'1*ATP(4-)'	'1*ADP(3-)+1*GTP(4-)'	'1*Adenine+1*alpha-D-Ribose 1-phosphate'
'1*ATP(4-)+1*Thymidine'		'1*ADP+1*dGDP'		'1*20-dihydroxyleukotriene B4'	'1*ADP+1*proton+1*N-((R)-4-Phosphopantothenoyl)-L-cysteine'	'1*N-Carbamoyl-L-aspartate'	'1*ADP(3-)+1*ITP(3-)'	'1*Adenosine+1*dGTP'
'1*ATP(3-)+1*dCDP(3-)'		'1*ADP+1*hydrogenphosphate+1*Succinyl-CoA'		'1*trans-2-cis,cis-5,8-tetradecatrienoyl-CoA'	'1*ADP+1*proton+1*phosphatidate(2-)'	'1*Citrate+1*oxalate(2-)'	'1*S-Adenosyl-L-homocysteine'	'1*ADP+1*proton+1*Pantetheine 4''-phosphate'
'1*ATP(4-)+1*Coenzyme A+1*Hexadecanoate (n-C16:0)'		'1*2-Oxoglutarate+1*Citrate'		'1*acetoacetate+1*butyrate'	'1*ADP+1*proton+1*hydrogenphosphate+1*glutathionate(1-)'	'1*Citrate'	'1*5-Amino-1-(5-Phospho-D-ribosyl)imidazole-4-carboxamide'	'1*ADP+1*UTP'
'1*CDP(3-)+1*dADP(3-)'		'1*2-Oxoglutarate+1*Citrate'		'1*Acetyl-CoA+1*Glycine'	'1*ADP+1*dUTP'	'1*Citrate+1*oxalate(2-)'	'1*2-Oxoglutarate+1*cis-aconitate(3-)'	'1*ADP(3-)+1*dITP(4-)'
'1*CTP+1*Reduced thioredoxin'		'1*2-Oxoglutarate+1*Ornithine'		'1*Acetyl-CoA+1*L-Carnitine'	'1*S-Adenosyl-L-homocysteine'	'1*CO2'	'1*2-Oxoglutarate+1*Citrate'	'1*5-Amino-1-(5-Phospho-D-ribosyl)imidazole-4-carboxamide'
'1*dADP(3-)+1*dGDP(2-)'		'1*arachidonate+1*(R)-carnitine'		'1*O-acetylcarnitine'	'1*2-Oxoglutarate+1*cis-aconitate(3-)'	'1*CTP+1*Reduced thioredoxin'	'1*2-Oxoglutarate+1*Isocitrate'	'1*2-Oxoglutarate+1*hydrogenphosphate'
'1*dTDP+1*dUDP(3-)'		'1*L-ascorbate'		'1*ADP'	'1*2-Oxoglutarate+1*4-Aminobutanoate'	'1*dADP(3-)+1*UDP(3-)'	'1*2-Oxoglutarate+1*cis-aconitate(3-)'	'1*2-Oxoglutarate+1*D-3-Amino-isobutanoate'
'1*dTDP+1*dUDP'		'1*L-ascorbate'		'1*ADP+1*3-Phospho-D-glyceroyl phosphate'	'1*2-Oxoglutarate+1*cis-aconitate(3-)'	'1*dGDP(2-)+1*UDP(3-)'	'1*2-Oxoglutarate+1*Citrate'	'1*beta-alanine'
'1*Flavin adenine dinucleotide oxidized'		'1*ATP(4-)+1*Coenzyme A+1*linoleate'		'1*ADP+1*CDP'	'1*2-Oxoglutarate+1*L-leucine'	'1*Deoxyguanosine'	'1*2-Oxoglutarate+1*Isocitrate'	'1*L-alanine+1*L-homoserine'
'1*FADH2(2-)'		'1*ATP(4-)+1*proton+1*NMN'		'1*ADP+1*dCTP'	'1*S-Adenosyl-L-methionine'	'1*Dihydroxyacetone phosphate'	'1*L-alanine+1*L-homoserine'	'1*AMP+1*ATP(4-)'
'1*L-glutamate(1-)+1*3-methyl-2-oxobutanoate'		'1*ATP(4-)+1*UMP'		'1*ADP+1*dTTP'	'1*AMP+1*Diphosphate+1*linoelaidyl coenzyme A'	'1*GDP+1*GTP'	'1*arachidate'	'1*ATP(4-)+1*AMP'
'1*L-glutamate(1-)+1*3-oxopropanoate'		'1*ATP(4-)+1*dADP(3-)'		'1*ADP+1*GDP'	'1*AMP+1*Diphosphate+1*linoleic coenzyme A'	'1*D-glucose'	'1*arachidonate'	'1*ATP(4-)+1*Coenzyme A+1*acetoacetate'
'1*L-glutamate(1-)+1*pyruvate'		'1*ATP(4-)+1*2''-deoxyuridine'		'1*ADP+1*GTP'	'1*L-aspartate(1-)'	'1*D-glucose'	'1*L-ascorbate'	'1*ATP(4-)+1*Deoxyguanosine'
'1*Hydrogen peroxide+1*proton+1*2,5-dihydroxybenzoate'		'1*ATP(4-)+1*Glycerol'		'1*ADP+1*GTP'	'1*ATP(4-)+1*N-[(R)-pantothenoyl]-L-cysteinate'	'1*D-glucuronate'	'1*ATP(4-)+1*dCMP'	'1*ATP(4-)+1*D-Fructose 6-phosphate'
'1*H2O+1*ATP(4-)+1*glycochenodeoxycholate'		'1*bilirubin(2-)'		'1*ADP(3-)+1*GTP(4-)'	'1*ATP(4-)+1*Adenosine'	'1*L-glutamate(1-)+1*Leukotriene D4'	'1*ATP(4-)+1*dTDP'	'1*ATP(4-)+1*pantetheine'
'1*H2O+1*CMP'		'1*Coenzyme A+1*ATP(4-)+1*Succinate'		'1*ADP(3-)'	'1*ATP(4-)+1*AMP'	'1*L-glutamate(1-)+1*leukotriene E4(1-)'	'1*ATP(4-)+1*Deoxyuridine'	'1*ATP(4-)+1*Pyridoxamine'
'1*H2O+1*dATP+1*Oxidized thioredoxin'		'1*L-Carnitine+1*O-acetylcarnitine'		'1*S-Adenosyl-L-homocysteine'	'1*ATP(4-)+1*N-acylsphingosine'	'1*Glycine+1*L-homoserine'	'1*ATP(4-)+1*IDP(3-)'	'1*ATP(4-)+1*alpha-D-Ribose 5-phosphate'
'1*H2O+1*dCTP+1*Oxidized thioredoxin'		'1*dADP+1*CDP'		'1*2-Oxoglutarate+1*cis-aconitate(3-)'	'1*ATP(4-)+1*diglyceride'	'1*Glycine+1*leukotriene E4(1-)'	'1*ATP(4-)+1*1-phosphatidyl-1D-myo-inositol(1-)'	'1*ATP(4-)+1*UDP'
'1*H2O+1*(1R,2R,3R,4R,5R,6S)-2,3,5,6-tetrahydroxy-4-(phosphonatooxy)cyclohexyl phosphate'		'1*dADP+1*dTDP'		'1*2-Oxoglutarate+1*D-3-Amino-isobutanoate'	'1*ATP(4-)+1*dAMP(2-)'	'1*Glycine+1*leukotriene F4'	'1*ATP(4-)+1*hydrogenphosphate'	'1*ATP(3-)+1*dGDP(2-)'
'1*H2O+1*Nicotinamide adenine dinucleotide'		'1*dADP+1*dTTP'		'1*2-Oxoglutarate+1*cis-aconitate(3-)'	'1*ATP(4-)+1*D-Fructose 6-phosphate'	'1*Glycerol 3-phosphate'	'1*ATP(4-)+1*dTMP'	'1*ATP(3-)+1*dIDP'
'1*H2O+1*O2+1*Gentisate aldehyde'		'1*dADP(3-)+1*dTDP'		'1*2-Oxoglutarate+1*L-alanine'	'1*ATP(4-)+1*1-phosphatidyl-1D-myo-inositol 5-phosphate(3-)'	'1*GTP+1*GDP'	'1*ATP(3-)+1*dGDP(2-)'	'1*ATP(3-)+1*1-phosphatidyl-1D-myo-inositol 5-phosphate(3-)'
'1*H2O+1*O2+1*Hypoxanthine'		'1*dATP+1*CMP'		'1*L-alanine'	'1*ATP(4-)+1*dCDP'	'1*GTP+1*Reduced thioredoxin'	'1*ATP(3-)+1*GDP(3-)'	'1*ATP(3-)+1*UDP(3-)'
'1*H2O+1*Pyridoxal 5''-phosphate'		'1*dATP+1*dTDP'		'1*S-Adenosyl-L-methionine+1*histamium'	'1*ATP(4-)+1*dCDP(3-)'	'1*Hydrogen peroxide+1*proton+1*Methylmalonate'	'1*CDP+1*dGDP'	'1*CO2+1*Nicotinamide adenine dinucleotide - reduced+1*Ammonium+1*5,10-Methylenetetrahydrofolate'
'1*water+1*keratan sulfate II (core 2-linked), degradation product 3'		'1*chenodeoxycholoyl coenzyme a'		'1*AMP+1*Diphosphate+1*vaccenyl coenzyme A'	'1*ATP(3-)+1*dCDP(3-)'	'1*Hydrogen peroxide+1*Pyridoxal'	'1*CDP(3-)+1*dADP(3-)'	'1*Coenzyme A+1*L-palmitoylcarnitine'
'1*H2O+1*Coenzyme A+1*Nicotinamide adenine dinucleotide+1*trans-Dec-2-enoyl-CoA'		'1*chenodeoxycholoyl coenzyme a'		'1*arachidonate'	'1*ATP(3-)+1*2''-deoxycytidine'	'1*Hydrogen peroxide+2*Reduced glutathione'	'1*Citrate+1*Isocitrate'	'1*L-Carnitine'
'1*H2O+1*Coenzyme A+1*Nicotinamide adenine dinucleotide+1*Flavin adenine dinucleotide oxidized+1*Decanoyl-CoA (n-C10:0CoA)'		'1*3-decenoylcoa'		'1*L-asparagine'	'1*bilirubin(2-)'	'1*H2O'	'1*Citrate+1*Succinate'	'1*CTP+1*Reduced thioredoxin'
'1*water+1*1-phosphatidyl-1D-myo-inositol 3,4-bisphosphate(5-)'		'1*dGDP(2-)+1*dUTP'		'1*ATP(4-)+1*3-Phospho-D-glycerate'	'1*CDP+1*dCDP'	'1*H2O+1*ATP(4-)+1*arachidonoyl-CoA(4-)'	'1*Citrate+1*Succinate'	'1*Cytidine+1*dUTP'
'1*proton+1*N-[(R)-pantothenoyl]-L-cysteinate'		'1*7,8-Dihydrofolate'		'1*ATP(4-)+1*CMP'	'1*CO2+1*Nicotinamide adenine dinucleotide - reduced+1*Ammonium+1*5,10-Methylenetetrahydrofolate'	'1*H2O+1*ATP(4-)+1*Reduced glutathione'	'1*CMP+1*dGTP'	'1*dATP'
'1*proton+1*2-Oxoglutarate+1*Citrate'		'1*4,8-dimethylnonanoyl carnitine'		'1*ATP(4-)+1*Coenzyme A+1*stearate'	'1*creatine'	'1*H2O+1*dCTP+1*Oxidized thioredoxin'	'1*Coenzyme A'	'1*dCTP+1*UMP'
'1*proton+1*D-alanine'		'1*Fumarate+1*sulfate'		'1*ATP(4-)+1*dCDP'	'1*L-Carnitine+1*propionyl-carnitine'	'1*H2O+1*Leukotriene D4'	'1*L-Carnitine+1*linoleate'	'1*dGTP'
'1*proton+1*L-lysinium(1+)+1*Ornithine'		'1*Fumarate+1*sulfate'		'1*ATP(4-)+1*dTDP'	'1*CTP(4-)+1*UMP(2-)'	'1*H2O+1*leukotriene F4'	'1*(R)-carnitine+1*linoleate'	'1*dIDP'
'1*proton+1*Nicotinamide adenine dinucleotide - reduced+1*Flavin adenine dinucleotide oxidized'		'1*Glyceraldehyde 3-phosphate'		'1*ATP(4-)+1*GDP'	'1*L-cysteine+1*L-homoserine'	'1*H2O+1*O2+1*2-methyl-3-oxopropanoate'	'1*CTP(4-)+1*UMP(2-)'	'1*dIDP'
'1*proton+1*Ornithine+1*L-lysinium(1+)'		'1*L-Glutamate 5-semialdehyde'		'1*ATP(4-)+1*GMP'	'1*dADP+1*dCDP'	'1*H2O+1*Octadecenoyl-CoA (n-C18:1CoA)'	'1*2-deoxyadenosine'	'1*dITP(4-)'
'1*proton+1*Nicotinamide adenine dinucleotide phosphate - reduced+1*zymosterol intermediate 2'		'1*L-glutamate(1-)+1*L-Glutamate 5-semialdehyde'		'1*ATP(4-)+1*pantetheine'	'1*dADP(3-)+1*dGDP(2-)'	'1*proton+1*dGDP+1*dUMP'	'1*dCMP(2-)+1*UTP(4-)'	'1*dITP(4-)'
'1*proton'		'1*Glycine'		'1*ATP(4-)+1*Pyridoxine'	'1*dADP(3-)+1*dTTP'	'1*proton+1*D-Glucose 1-phosphate+1*UTP'	'1*dGTP+1*UMP'	'1*dihomo-gamma-linolenic acid (n-6)'
'1*gamma-linolenate'		'1*Glycerol 3-phosphate'		'1*ATP(4-)+1*dTDP'	'1*dADP(3-)+1*dUTP'	'1*proton+1*Nicotinamide adenine dinucleotide phosphate - reduced+1*D-glucuronate'	'1*dTMP'	'1*elaidate'
'1*Sodium+1*potassium+2*Chloride'		'1*GMP'		'1*ATP(4-)+1*dUMP(2-)'	'1*dATP'	'1*proton+1*Phosphoenolpyruvate+1*dTDP'	'1*dTTP'	'1*D-Fructose 6-phosphate'
'1*Sodium+1*Glycine+1*L-homoserine'		'1*H2O+1*Acetoacetyl-CoA+1*Acetyl-CoA'		'1*ATP(4-)+1*GDP'	'1*dATP+1*dCMP'	'1*proton+1*acetate'	'1*D-Glucose 6-phosphate'	'1*Flavin adenine dinucleotide reduced+1*2-Methylprop-2-enoyl-CoA'
'1*Sodium+1*potassium+2*Chloride'		'1*H2O+1*ATP(4-)+1*choloyl-CoA(4-)'		'1*ATP(4-)+1*Glycerol'	'1*dCDP+1*dUDP(3-)'	'1*proton+1*Nicotinamide adenine dinucleotide phosphate - reduced+1*dihydrofolate(2-)'	'1*L-glutamine'	'1*glycocholate'
'1*Nicotinamide adenine dinucleotide+1*5-Methyltetrahydrofolate'		'1*H2O+1*ATP(4-)+1*glycochenodeoxycholate'		'1*ATP(3-)+1*dCDP(3-)'	'1*dCDP(3-)+1*dUDP'	'1*proton+1*dCMP(2-)+1*UDP(3-)'	'1*Glycine'	'1*glycocholate'
'1*Nicotinamide adenine dinucleotide+1*FADH2(2-)'		'1*H2O+1*ATP(4-)+1*dihomo-gamma-linolenic acid (n-6)'		'1*ATP(3-)+1*dCMP(2-)'	'1*dGTP+1*dTDP'	'1*Bicarbonate+1*arachidonate+1*Reduced glutathione'	'1*Glycine+1*L-homoserine'	'1*L-glutamate(1-)+1*L-proline'
'1*Nicotinamide adenine dinucleotide+1*L-gulonate'		'1*H2O+1*ATP(4-)+1*elaidate'		'1*ATP(3-)+1*dIDP'	'1*dGTP+1*UMP'	'1*Bicarbonate+1*Reduced glutathione+1*Leukotriene D4'	'1*L-gulonate'	'1*L-glutamate(1-)+1*L-Glutamate 5-semialdehyde'
'1*Nicotinamide adenine dinucleotide+1*Coenzyme A+1*Decanoyl-CoA (n-C10:0CoA)+1*O2+1*H2O'		'1*H2O+1*ATP(4-)+1*Reduced glutathione'		'1*ATP(3-)+1*GDP(3-)'	'1*3alpha,7alpha-Dihydroxy-5beta-cholestanate'	'1*Bicarbonate+1*Reduced glutathione+1*leukotriene F4'	'1*H2O+1*ATP(4-)+1*L-aspartate(1-)+1*L-glutamine'	'1*L-glutamate(1-)+1*L-proline'
'1*Nicotinamide adenine dinucleotide+1*Coenzyme A+1*O2+1*H2O+1*Hexanoyl-CoA (n-C6:0CoA)'		'1*H2O+1*ATP(4-)+1*Hexadecenoate (n-C16:1)'		'1*ATP(3-)+1*1-phosphatidyl-1D-myo-inositol 3,4-bisphosphate(5-)'	'1*3alpha,7alpha-Dihydroxy-5beta-cholestanate'	'1*palmitate'	'1*H2O+1*IMP'	'1*Glycerol 3-phosphate'
'1*Nicotinamide adenine dinucleotide phosphate'		'1*H2O+1*proton+1*Cytidine'		'1*ATP(3-)+1*1-phosphatidyl-1D-myo-inositol 5-phosphate(3-)'	'1*Deoxyinosine'	'1*Hexadecenoate (n-C16:1)'	'1*H2O+1*Nicotinamide adenine dinucleotide+1*(S)-lactaldehyde'	'1*Reduced glutathione'
'1*Nicotinamide adenine dinucleotide phosphate - reduced'		'1*H2O+1*Nicotinamide adenine dinucleotide+1*Hypoxanthine'		'1*ATP(3-)+1*UMP(2-)'	'1*Deoxyinosine'	'1*L-histidine'	'1*H2O+1*Nicotinamide adenine dinucleotide phosphate+1*methylglyoxal'	'1*Guanine+1*alpha-D-Ribose 1-phosphate'
'1*Ammonium+4*Sodium+1*calcium(2+)'		'1*H2O+1*NMN'		'1*bis(beta-glucosyluronate)bilirubin'	'1*4,8-dimethylnonanoyl carnitine'	'1*L-homoserine+1*L-tryptophan'	'1*H2O+1*Nicotinamide adenine dinucleotide phosphate+1*4-ammoniobutanal'	'1*Hydrogen peroxide+1*proton+1*Methylmalonate'
'1*O2+1*cis-deca-4-enoyl-CoA'		'1*H2O+1*phosphatidylinositol 4,5-bisphosphate'		'1*bis(beta-glucosyluronate)bilirubin'	'1*dTDP+1*dUDP(3-)'	'1*Hypoxanthine+1*alpha-D-Ribose 1-phosphate'	'1*H2O+1*Nicotinamide adenine dinucleotide phosphate+1*Succinic semialdehyde'	'1*H2O+1*Acetoacetyl-CoA+1*Acetyl-CoA'
'1*propionyl-carnitine'		'1*H2O+1*1-phosphatidyl-1D-myo-inositol(1-)'		'1*bilirubin(2-)'	'1*dTDP+1*dUDP'	'1*Isocitrate+1*cis-aconitate(3-)'	'1*proton+1*Nicotinamide adenine dinucleotide - reduced+1*3alpha,7alpha,12alpha-trihydroxy-5beta-cholestan-27-al'	'1*H2O+1*ATP(4-)+1*stearidonic acid C18:4, n-3'
'1*Propanoyl-CoA'		'1*water+1*D-galactosyl-N-acylsphingosine'		'1*CDP+1*dCDP'	'1*Flavin adenine dinucleotide oxidized+1*Succinate'	'1*Isocitrate+1*oxalate(2-)'	'1*proton'	'1*H2O+1*dCTP+1*Oxidized thioredoxin'
'1*5-Phospho-alpha-D-ribose 1-diphosphate+1*Orotate'		'1*water+1*keratan sulfate I, degradation product 14'		'1*CDP(3-)+1*dGDP(2-)'	'1*Flavin adenine dinucleotide reduced+1*Fumarate'	'1*Isocitrate'	'1*proton+1*D-glucuronate'	'1*H2O+1*D-Fructose 1,6-bisphosphate'
'1*pyruvate+1*ATP(4-)+1*Bicarbonate'		'1*water+1*keratan sulfate I, degradation product 17'		'1*CDP(3-)+1*GDP(3-)'	'1*D-Glucose 1-phosphate'	'1*Isocitrate+1*cis-aconitate(3-)'	'1*proton+1*Nicotinamide adenine dinucleotide phosphate - reduced+1*D-glucuronate'	'1*H2O+1*GMP'
'1*ubiquinone-10+1*Decanoyl-CoA (n-C10:0CoA)'		'1*H2O+1*Coenzyme A+1*Nicotinamide adenine dinucleotide+1*Flavin adenine dinucleotide oxidized+1*linoleic coenzyme A'		'1*Citrate+1*(S)-malate(2-)'	'1*GDP-alpha-D-mannose(2-)'	'1*Isocitrate+1*oxalate(2-)'	'1*Bicarbonate+1*prostaglandin H2(1-)'	'1*H2O+1*IMP'
'1*UTP+1*D-Fructose 6-phosphate'		'1*H2O+1*Coenzyme A+1*Nicotinamide adenine dinucleotide+1*Flavin adenine dinucleotide oxidized+1*5,8-tetradecadienoylcoa'		'1*Citrate+1*oxalate(2-)'	'1*L-glutamate(1-)+1*4-methyl-2-oxopentanoate'	'1*potassium'	'1*Bicarbonate+1*prostaglandin I2(1-)'	'1*H2O+1*O2+1*2-methyl-3-oxopropanoate'
'1*D-xylulose 5-phosphate(2-)'		'1*H2O+1*ATP(4-)+1*cholesterol'		'1*Citrate+1*Phosphoenolpyruvate'	'1*L-glutamate(1-)+1*Succinic semialdehyde'	'1*Leukotriene D4'	'1*L-histidine'	'1*H2O+1*phosphatidate(2-)'
'2*proton+1*Nicotinamide adenine dinucleotide - reduced+1*5,10-Methylenetetrahydrofolate'		'1*H2O+1*Phosphatidylcholine'		'1*Citrate+1*(S)-malate(2-)'	'1*Glycine+1*leukotriene E4(1-)'	'1*Leukotriene D4'	'1*L-homoserine+1*L-phenylalanine'	'1*H2O+1*L-glutamine'
		'1*proton+1*Fe2+'		'1*Citrate+1*oxalate(2-)'	'1*Reduced glutathione'	'1*leukotriene F4'	'1*L-homoserine+1*L-tyrosine'	'1*water+1*1-phosphatidyl-1D-myo-inositol 4-phosphate(3-)'
		'1*proton+1*Nicotinate+1*alpha-D-Ribose 1-phosphate'		'1*CMP+1*UTP'	'1*Hydrogen peroxide+1*proton+1*Methylmalonate'	'1*leukotriene F4'	'1*Isocitrate+1*Citrate'	'1*H2O+1*NAD(1-)+1*all-trans-retinal'
		'1*proton+1*Nicotinamide adenine dinucleotide - reduced+1*Flavin adenine dinucleotide oxidized'		'1*CMP(2-)+1*GTP(4-)'	'1*H2O+1*O2''-4a-cyclic-tetrahydrobiopterin'	'1*Nicotinamide adenine dinucleotide+1*7,8-Dihydrofolate'	'1*leukotriene C4(2-)'	'1*H2O+1*UDP'
		'1*proton+1*Nicotinamide adenine dinucleotide - reduced+1*Xanthine'		'1*Coenzyme A'	'1*H2O+1*arachidyl coenzyme A'	'1*Nicotinamide adenine dinucleotide+1*D-glucitol'	'1*Leukotriene D4'	'1*proton+1*2-Oxobutanoate+1*Nicotinamide adenine dinucleotide - reduced'
		'1*proton+1*5-Phospho-alpha-D-ribose 1-diphosphate+1*Nicotinate'		'1*Coenzyme A+1*taurocholic acid'	'1*H2O+1*ATP(4-)+1*linoleate'	'1*Nicotinamide adenine dinucleotide phosphate+1*L-gulonate'	'1*Leukotriene D4'	'1*proton+1*AMP+1*5-Phospho-alpha-D-ribose 1-diphosphate'
		'1*proton+1*D-glucuronate'		'1*Coenzyme A+1*GTP+1*Succinate'	'1*H2O+1*dGMP'	'1*Ammonium+1*Chloride'	'1*leukotriene E4(1-)'	'1*proton+1*CMP+1*dUDP'
		'1*proton+1*Nicotinamide adenine dinucleotide - reduced+1*(2S)-2-azaniumyl-4-{[(1R)-2-{[(2R)-2-[(4S)-4-azaniumyl-4-carboxylatobutanamido]-2-[(carboxylatomethyl)carbamoyl]ethyl]disulfanyl}-1-[(carboxylatomethyl)carbamoyl]ethyl]carbamoyl}butanoate'		'1*Coenzyme A'	'1*H2O+1*D-Glucosamine 6-phosphate'	'1*Ammonium+1*Nicotinate D-ribonucleotide'	'1*leukotriene F4'	'1*proton+1*(S)-lactate'
		'1*proton+1*NADH(2-)+1*6-O-phosphonato-D-glucono-1,5-lactone(2-)'		'1*Coenzyme A+1*O-acetylcarnitine'	'1*H2O+1*Leukotriene D4'	'1*O2+1*proton+1*Nicotinamide adenine dinucleotide phosphate - reduced+1*all-trans-retinoate'	'1*5alpha-cholest-7-en-3beta-ol'	'1*proton+1*Nicotinamide adenine dinucleotide - reduced+1*Oxaloacetate'
		'1*Bicarbonate+1*arachidonate+1*Reduced glutathione'		'1*L-Carnitine+1*O-acetylcarnitine'	'1*H2O+1*Nicotinamide adenine dinucleotide+1*Gentisate aldehyde'	'1*O2+1*Pyridoxine'	'1*(S)-malate(2-)'	'1*proton+1*pyruvate+1*Nicotinamide adenine dinucleotide - reduced'
		'1*Bicarbonate+1*Reduced glutathione+1*prostaglandin H2(1-)'		'1*L-Carnitine+1*Hexadecanoate (n-C16:0)'	'1*H2O+1*Nicotinamide adenine dinucleotide+1*acetaldehyde'	'1*oxalate(2-)+1*cis-aconitate(3-)'	'1*L-methionine+1*L-homoserine'	'1*proton+1*ATP(4-)+1*pantetheine 4''-phosphate(2-)'
		'1*Bicarbonate+1*Reduced glutathione+1*prostaglandin I2(1-)'		'1*L-Carnitine+1*octadecenoate (n-C18:1)'	'1*H2O+1*Nicotinamide adenine dinucleotide phosphate+1*3,4-Dihydroxymandelaldehyde'	'1*hydrogenphosphate'	'1*Nicotinamide adenine dinucleotide'	'1*proton+1*Nicotinamide adenine dinucleotide - reduced+1*3-Oxododecanoyl-CoA'
		'1*Bicarbonate+1*Sodium'		'1*L-Carnitine+1*Octadecenoyl-CoA (n-C18:1CoA)'	'1*H2O+1*Nicotinamide adenine dinucleotide phosphate+1*3,4-Dihydroxyphenylacetaldehyde'	'1*Diphosphate+1*UDPglucose'	'1*Nicotinamide adenine dinucleotide+1*L-gulonate'	'1*proton+1*Nicotinamide adenine dinucleotide phosphate - reduced+1*(2S)-2-azaniumyl-4-{[(1R)-2-{[(2R)-2-[(4S)-4-azaniumyl-4-carboxylatobutanamido]-2-[(carboxylatomethyl)carbamoyl]ethyl]disulfanyl}-1-[(carboxylatomethyl)carbamoyl]ethyl]carbamoyl}butanoate'
		'1*Hydroxymethylglutaryl-CoA'		'1*L-Carnitine+1*propionyl-carnitine'	'1*H2O+1*Nicotinamide adenine dinucleotide phosphate+1*3-Methoxy-4-hydroxyphenylglycolaldehyde'	'1*5-Phospho-alpha-D-ribose 1-diphosphate+1*Guanine'	'1*Nicotinamide adenine dinucleotide'	'1*proton+1*dCMP(2-)+1*UDP(3-)'
		'1*Sodium+1*adrenic acid'		'1*(R)-carnitine'	'1*H2O+1*Nicotinamide adenine dinucleotide phosphate+1*retinal'	'1*Putrescine'	'1*Nicotinamide adenine dinucleotide phosphate+1*11-cis-retinol'	'1*Bicarbonate+1*Reduced glutathione+1*Leukotriene D4'
		'1*Sodium+1*adrenic acid'		'1*(R)-carnitine+1*palmitate'	'1*H2O+1*Nicotinamide adenine dinucleotide phosphate+1*3alpha,7alpha-dihydroxy-5beta-cholestan-26-al'	'1*pyruvate+1*dTTP'	'1*Nicotinamide adenine dinucleotide phosphate+1*L-gulonate'	'1*L-isoleucine'
		'1*Sodium+1*Chloride+1*Taurine'		'1*(R)-carnitine+1*octadecenoate (n-C18:1)'	'1*H2O+1*O2+1*2-methyl-3-oxopropanoate'	'1*Riboflavin'	'1*Nicotinamide adenine dinucleotide phosphate+1*5alpha-cholest-8-en-3beta-ol'	'1*ITP(3-)+1*D-glucose'
		'1*Sodium+1*L-glutamine+1*L-homoserine'		'1*2-deoxyadenosine'	'1*H2O+1*O2+1*Pyridoxamine 5''-phosphate'	'1*L-serine'	'1*Nicotinamide adenine dinucleotide phosphate - reduced'	'1*lignocerate'
		'1*Sodium+1*L-homoserine+1*L-histidine'		'1*dADP(3-)+1*UDP(3-)'	'1*H2O+1*phosphatidylinositol 4,5-bisphosphate'	'1*sulfate+1*Malonate'	'1*O2+1*proton+1*calcidiol+1*Nicotinamide adenine dinucleotide phosphate - reduced'	'1*lignocerate'
		'1*Sodium+1*taurocholic acid'		'1*dATP+1*D-glucose'	'1*water+1*hexaglutamyl folate (DHF)'	'1*sulfate+1*Succinate'	'1*O2+2*all-trans-retinoate'	'1*alpha-linolenate'
		'1*Sodium+1*L-threonine+1*L-homoserine'		'1*dCDP(3-)+1*ADP(3-)'	'1*water+1*keratan sulfate I, degradation product 32'	'1*taurocholic acid'	'1*1-phosphatidyl-1D-myo-inositol 4-phosphate(3-)'	'1*(S)-malate(2-)+1*cis-aconitate(3-)'
		'1*Nicotinamide adenine dinucleotide+1*7,8-Dihydrofolate'		'1*glycochenodeoxycholate'	'1*H2O+1*Coenzyme A+1*Nicotinamide adenine dinucleotide+1*trans-Dec-2-enoyl-CoA'	'1*5,6,7,8-Tetrahydrofolate'	'1*1-phosphatidyl-1D-myo-inositol 4-phosphate(3-)'	'1*(S)-malate(2-)+1*cis-aconitate(3-)'
		'1*Nicotinamide adenine dinucleotide+1*FADH2(2-)'		'1*dGDP+1*dCDP'	'1*H2O+1*trans-dodec-2-enoyl-CoA(4-)'	'1*5,6,7,8-Tetrahydrofolate'	'1*phosphatidylglycerol(1-)'	'1*Sodium+1*L-argininium(1+)+1*L-homoserine'
		'1*Nicotinamide adenine dinucleotide+1*(R)-lactaldehyde'		'1*dGMP'	'1*H2O+1*(S)-methylmalonyl-CoA(5-)'	'1*UMP'	'1*hydrogenphosphate+1*Malonate'	'1*Nicotinamide adenine dinucleotide+1*(S)-lactate'
		'1*Nicotinamide adenine dinucleotide+1*Diphosphate'		'1*dGTP+1*dCMP'	'1*H2O+1*Nicotinamide adenine dinucleotide+1*2-methyl-3-oxopropanoate'	'1*UTP+1*UMP'	'1*hydrogenphosphate+1*Malonate'	'1*Nicotinamide adenine dinucleotide+1*(R)-lactaldehyde'
		'1*Nicotinamide adenine dinucleotide+2*glutathionate(1-)'		'1*Dihydroxyacetone phosphate'	'1*water'	'1*UTP(4-)+1*2''-deoxycytidine'	'1*hydrogenphosphate'	'1*Nicotinamide adenine dinucleotide+1*(S)-malate(2-)'
		'1*Nicotinamide adenine dinucleotide+1*Coenzyme A+1*Decanoyl-CoA (n-C10:0CoA)+1*O2+1*H2O'		'1*dehydroascorbide(1-)+2*Reduced glutathione'	'1*H2O+1*phytanoyl-CoA(4-)'	'2*proton+1*Nicotinamide adenine dinucleotide - reduced+1*Succinate'	'1*Propanoyl-CoA+1*L-Carnitine'	'1*Nicotinamide adenine dinucleotide+1*xylitol'
		'1*Nicotinamide adenine dinucleotide phosphate+1*trans-4-hydroxy-L-proline'		'1*dIDP'	'1*proton+1*L-argininium(1+)+1*Ornithine'	'2*Sodium+1*glycochenodeoxycholate'	'1*Propanoyl-CoA'	'1*Nicotinamide adenine dinucleotide+1*Isocitrate'
		'1*Nicotinamide adenine dinucleotide phosphate'		'1*dIDP'	'1*proton+1*L-argininium(1+)+1*L-histidine'	'2*UDP'	'1*all-trans-retinoate'	'1*Nicotinamide adenine dinucleotide+1*(S)-malate(2-)'
		'1*Ammonium'		'1*dihomo-gamma-linolenic acid (n-6)'	'1*proton+1*L-citrulline+1*L-histidine'	'3*Bicarbonate+1*Sodium'	'1*Riboflavin'	'1*Nicotinamide adenine dinucleotide'
		'1*Ammonium+1*Nicotinate D-ribonucleotide'		'1*elaidate'	'1*proton+1*Coenzyme A+1*arachidate'		'1*Sulfite+1*Succinate'	'1*Nicotinamide adenine dinucleotide+1*Coenzyme A+1*H2O+1*trans-Dodec-2-enoyl-CoA'
		'1*O2+1*proton+1*Nicotinamide adenine dinucleotide - reduced+1*Stearoyl-CoA (n-C18:0CoA)'		'1*estradiol'	'1*proton+1*CTP+1*choline phosphate(1-)'		'1*hydrogensulfite+1*Succinate'	'1*Nicotinamide adenine dinucleotide phosphate+1*Isocitrate'
		'1*O2+1*proton+1*Nicotinamide adenine dinucleotide phosphate - reduced+1*5alpha-cholest-7-en-3beta-ol'		'1*Flavin adenine dinucleotide oxidized'	'1*proton+1*GDP+1*D-Mannose 1-phosphate'		'1*stearidonic acid C18:4, n-3'	'1*Norepinephrine'
		'1*O2'		'1*Flavin adenine dinucleotide oxidized+1*L-proline'	'1*proton+1*Sodium'		'1*Succinate+1*cis-aconitate(3-)'	'1*Norepinephrine'
		'1*1-phosphatidyl-1D-myo-inositol 4-phosphate(3-)'		'1*Flavin adenine dinucleotide oxidized+1*cis,cis-myristo-5,8-dienoyl-CoA'	'1*proton+1*Nicotinate+1*alpha-D-Ribose 1-phosphate'		'1*Succinate+1*cis-aconitate(3-)'	'1*Octanoyl-CoA (n-C8:0CoA)'
		'1*1-phosphatidyl-1D-myo-inositol 4-phosphate(3-)'		'1*FADH2(2-)'	'1*proton+1*Nicotinamide adenine dinucleotide - reduced+1*3-Phospho-D-glyceroyl phosphate'		'1*taurocholic acid'	'1*Orotate'
		'1*L-phenylalanine'		'1*Flavin adenine dinucleotide reduced+1*trans-2-cis,cis-5,8-tetradecatrienoyl-CoA'	'1*proton+1*Nicotinamide adenine dinucleotide - reduced+1*7,8-Dihydrofolate'		'1*UDP+1*dGDP'	'1*1-phosphatidyl-1D-myo-inositol 4-phosphate(3-)'
		'1*hydrogenphosphate+1*(S)-malate(2-)'		'1*Flavin adenine dinucleotide reduced+1*ubiquinone-10'	'1*proton+1*Nicotinamide adenine dinucleotide - reduced+1*D-glucose'		'1*UTP(4-)+1*UMP(2-)'	'1*1-phosphatidyl-1D-myo-inositol 4-phosphate(3-)'
		'1*hydrogenphosphate+1*1-phosphatidyl-1D-myo-inositol(1-)'		'1*Glyceraldehyde 3-phosphate+1*D-Fructose 6-phosphate'	'1*proton+1*Nicotinamide adenine dinucleotide - reduced+1*Taurine'		'1*D-xylulose 5-phosphate(2-)'	'1*1-phosphatidyl-1D-myo-inositol(1-)+1*hydrogenphosphate'
		'1*hydrogenphosphate+1*xanthosine'		'1*D-glucose'	'1*proton+1*Nicotinamide adenine dinucleotide phosphate - reduced+1*D-glucose'		'2*ADP'	'1*Phosphatidylcholine'
		'1*hydrogenphosphate+1*(S)-malate(2-)'		'1*L-Glutamate 5-semialdehyde'	'1*proton+1*Nicotinamide adenine dinucleotide phosphate - reduced+1*3-hydroxypyruvate'		'2*proton+1*pyruvate+1*Nicotinamide adenine dinucleotide phosphate - reduced'	'1*phosphatidylethanolamine'
		'1*L-palmitoylcarnitine+1*(R)-carnitine'		'1*L-glutamate(1-)+1*L-proline'	'1*proton+1*D-glucuronate'		'2*proton+1*Nicotinamide adenine dinucleotide phosphate - reduced+1*4-Aminobutanoate'	'1*L-phenylalanine'
		'1*Diphosphate+1*Nicotinate D-ribonucleotide'		'1*L-glutamate(1-)+1*pyruvate'	'1*proton+1*pyruvate'		'2*proton+2*Superoxide anion'	'1*hydrogenphosphate+1*Glycerol 3-phosphate'
		'1*ps_hs[c]'		'1*glycine+1*choloyl-CoA(4-)'	'1*proton+1*dCMP(2-)+1*ADP(3-)'		'2*UDP(3-)'	'1*Diphosphate+1*Nicotinate D-ribonucleotide'
		'1*ubiquinone-10+1*Hexanoyl-CoA'		'1*Glycerol 3-phosphate'	'1*proton+1*Nicotinamide adenine dinucleotide phosphate - reduced+1*desmosterol'			'1*diphosphate(3-)'
		'1*ubiquinone-10+1*Tetradecanoyl-CoA (n-C14:0CoA)'		'1*L-gulonate'	'1*Bicarbonate+1*bis(beta-glucosyluronate)bilirubin+1*Reduced glutathione'			'1*pristanoyl coa'
		'1*alpha-D-Ribose 1-phosphate'		'1*H2O'	'1*Bicarbonate+1*taurocholic acid'			'1*pristanoyl coa'
		'1*alpha-D-Ribose 5-phosphate'		'1*H2O+1*fatty acid 11-cis-retinol'	'1*L-isoleucine'			'1*5-Phospho-alpha-D-ribose 1-diphosphate+1*Guanine'
		'1*Sulfite+1*Malonate'		'1*H2O+1*ATP(4-)+1*choloyl-CoA(4-)'	'1*leukotriene A4(1-)'			'1*Ubiquinol-10+1*L-proline'
		'1*hydrogensulfite+1*Malonate'		'1*H2O+1*ATP(4-)+1*glycochenodeoxycholate'	'1*D-Mannose+1*ITP(3-)'			'1*alpha-D-Ribose 5-phosphate+1*D-xylulose 5-phosphate(2-)'
		'1*taurochenodeoxycholate'		'1*H2O+1*ATP(4-)+1*Sodium+1*potassium'	'1*Sodium+1*palmitate'			'1*taurochenodeoxycholate'
		'1*UDP+1*dCDP'		'1*H2O+1*ATP(4-)+1*Phosphatidylcholine'	'1*Nicotinamide adenine dinucleotide+1*(S)-lactate'			'1*UDPglucose'
		'1*UDP(3-)+1*water'		'1*H2O+1*ATP(4-)+1*Propanoyl-CoA'	'1*Nicotinamide adenine dinucleotide+1*D-glucitol'			'1*UDPglucose+1*UMP'
		'1*UDPglucose+1*UMP'		'1*H2O+1*ATP(4-)+1*stearidonic acid C18:4, n-3'	'1*Nicotinamide adenine dinucleotide+1*Coenzyme A+1*Dodecanoyl-CoA (n-C12:0CoA)+1*O2+1*H2O'			'1*UDP-D-galactose(2-)+1*UMP(2-)'
		'1*[(2R,3S,4R,5R)-5-(2,4-dioxo-1,2,3,4-tetrahydropyrimidin-1-yl)-3,4-dihydroxyoxolan-2-yl]methyl {[(3R,4S,5S,6R)-3,4,5-trihydroxy-6-(hydroxymethyl)oxan-2-yl phosphonato]oxy}phosphonate'		'1*H2O+1*ATP(4-)+1*Thiamin'	'1*Nicotinamide adenine dinucleotide+1*Coenzyme A+1*Tetradecanoyl-CoA (n-C14:0CoA)+1*O2+1*H2O'			'1*UMP+1*[(2R,3S,4R,5R)-5-(2,4-dioxo-1,2,3,4-tetrahydropyrimidin-1-yl)-3,4-dihydroxyoxolan-2-yl]methyl {[(3R,4S,5S,6R)-3,4,5-trihydroxy-6-(hydroxymethyl)oxan-2-yl phosphonato]oxy}phosphonate'
		'1*UMP+1*[(2R,3S,4R,5R)-5-(2,4-dioxo-1,2,3,4-tetrahydropyrimidin-1-yl)-3,4-dihydroxyoxolan-2-yl]methyl {[(3R,4S,5S,6R)-3,4,5-trihydroxy-6-(hydroxymethyl)oxan-2-yl phosphonato]oxy}phosphonate'		'1*H2O+1*CO2'	'1*Nicotinamide adenine dinucleotide phosphate+1*(S)-malate(2-)'			'1*UTP(4-)+1*ADP(3-)'
		'1*Uracil+1*alpha-D-Ribose 1-phosphate'		'1*H2O+1*dUTP'	'1*Ammonium+1*pyruvate'			'1*UTP(4-)+1*2''-deoxycytidine'
		'1*Urate'		'1*H2O+1*Nicotinamide adenine dinucleotide+1*3alpha,7alpha,12alpha-trihydroxy-5beta-cholestan-27-al'	'1*O2+1*proton+1*Nicotinamide adenine dinucleotide - reduced+1*vaccenyl coenzyme A'			'1*Xanthine+1*alpha-D-Ribose 1-phosphate'
		'2*water+1*keratan sulfate I, degradation product 24'		'1*H2O+1*Nicotinamide adenine dinucleotide phosphate+1*retinal'	'1*Octanoyl-CoA (n-C8:0CoA)'			'1*zymosterol+1*FADH2(2-)'
		'2*proton+1*Nicotinamide adenine dinucleotide phosphate - reduced+1*L-1-Pyrroline-3-hydroxy-5-carboxylate'		'1*H2O+1*O2+1*Spermidine'	'1*octadecenoate (n-C18:1)'			'2*proton+1*NADH(2-)+1*13-cis-retinoate'
		'3*proton+2*Nicotinamide adenine dinucleotide phosphate - reduced+1*Malonyl-CoA+1*Tetradecanoyl-CoA (n-C14:0CoA)'		'1*H2O+1*1-phosphatidyl-1D-myo-inositol 3-phosphate(3-)'	'1*Phosphatidylcholine+1*9-cis-retinol'			'2*proton+1*NADH(2-)+1*9-cis-retinoate'
		'5*H2O+5*Coenzyme A+5*Nicotinamide adenine dinucleotide+4*Flavin adenine dinucleotide oxidized+1*Octadecenoyl-CoA (n-C18:1CoA)'		'1*H2O+1*Propanoyl-CoA+1*Oxaloacetate'	'1*hydrogenphosphate+1*Deoxyuridine'			'2*Sodium+1*Taurine'
				'1*H2O+1*(2E)-Hexenoyl-CoA'	'1*hydrogenphosphate+1*(S)-malate(2-)'			'2*Sodium+1*Taurine'
				'1*H2O+1*Acetyl-CoA+1*acetoacetyl-CoA(4-)'	'1*hydrogenphosphate+1*Nicotinamide adenine dinucleotide+1*Glyceraldehyde 3-phosphate'			'4*H2O+4*Coenzyme A+4*Nicotinamide adenine dinucleotide+3*Flavin adenine dinucleotide oxidized+1*trans-Hexadec-2-enoyl-CoA'
				'1*H2O+1*Coenzyme A+1*Nicotinamide adenine dinucleotide+1*Flavin adenine dinucleotide oxidized+1*Decanoyl-CoA (n-C10:0CoA)'	'1*hydrogenphosphate+1*(S)-malate(2-)'			'5*proton+1*ubiquinone-10+1*1-Pyrroline-5-carboxylate'
				'1*H2O+1*Coenzyme A+1*Nicotinamide adenine dinucleotide+1*Flavin adenine dinucleotide oxidized+1*linoleic coenzyme A'	'1*Diphosphate'
				'1*H2O+1*Nicotinamide adenine dinucleotide+1*Succinic semialdehyde'	'1*Diphosphate+1*presqualene diphosphate(3-)'
				'1*H2O+1*Nicotinamide adenine dinucleotide phosphate+1*4-ammoniobutanal'	'1*5-Phospho-alpha-D-ribose 1-diphosphate+1*Guanine'
				'1*H2O+1*Nicotinamide adenine dinucleotide phosphate+1*L-glutamate(1-)'	'1*5-Phospho-alpha-D-ribose 1-diphosphate+1*Hypoxanthine'
				'1*H2O+1*Nicotinamide adenine dinucleotide phosphate+1*Succinic semialdehyde'	'1*ubiquinone-10+1*Hexanoyl-CoA'
				'1*H2O'	'1*Sulfite+1*Fumarate'
				'1*H2O+1*20-oxo-leukotriene B4'	'1*hydrogensulfite+1*Fumarate'
				'1*H2O+1*ATP(4-)+1*cholesterol'	'1*L-threonine+1*L-homoserine'
				'1*H2O+1*D-Glucose 6-phosphate'	'1*UDP+1*dGDP'
				'1*H2O+1*ATP(4-)+1*taurocholate'	'1*UDP(3-)+1*water'
				'1*H2O+1*phytanoyl-CoA(4-)'	'1*UDP-N-acetyl-D-galactosamine(2-)+1*Tn antigen'
				'1*proton+1*cis-aconitate(3-)+1*oxalate(2-)'	'1*UDP-D-galactose(2-)+1*D-galactosyl-N-acylsphingosine'
				'1*proton+1*L-argininium(1+)+1*Ornithine'	'1*UDP-D-glucuronate'
				'1*proton+1*L-argininium(1+)+1*L-histidine'	'1*UDP-D-glucuronate'
				'1*proton+1*Citrate'	'2*ADP'
				'1*proton+1*L-glutamate(1-)'	'2*Farnesyl diphosphate'
				'1*proton+1*Bicarbonate'	'2*Hydrogen peroxide+1*dehydroascorbide(1-)'
				'1*proton+1*L-histidine'	'2*Hydrogen peroxide'
				'1*proton+1*Nicotinamide adenine dinucleotide - reduced+1*ubiquinone-10'	'2*H2O+1*Thiamine diphosphate'
				'1*proton+1*Nicotinamide adenine dinucleotide - reduced+1*7alpha-hydroxy-5beta-cholestan-3-one'	'2*proton+1*Nicotinamide adenine dinucleotide - reduced+1*2,5-dihydroxybenzoate'
				'1*proton+1*Nicotinamide adenine dinucleotide phosphate - reduced+1*hydroxyacetone'	'2*proton+1*Nicotinamide adenine dinucleotide phosphate - reduced+1*3,4-Dihydroxymandelate'
				'1*proton+1*Nicotinamide adenine dinucleotide phosphate - reduced+1*trans-Octadec-2-enoyl-CoA'	'2*proton+1*Nicotinamide adenine dinucleotide phosphate - reduced+1*(3,4-dihydroxyphenyl)acetate'
				'1*proton+1*Nicotinamide adenine dinucleotide phosphate - reduced+1*Uracil'	'2*proton+1*Nicotinamide adenine dinucleotide phosphate - reduced+1*3-Methoxy-4-hydroxymandelate'
				'1*proton+1*Nicotinamide adenine dinucleotide phosphate - reduced+1*7alpha-hydroxycholest-4-en-3-one'	'2*proton+1*Nicotinamide adenine dinucleotide phosphate - reduced+1*3alpha,7alpha-Dihydroxy-5beta-cholestanate'
				'1*proton+1*Ornithine+1*L-histidine'	'2*proton+2*superoxide'
				'1*proton+1*Phosphoenolpyruvate+1*CDP'	'2*Sodium+1*5-oxoprolinate'
				'1*proton+1*dGDP(2-)+1*dUMP(2-)'	'2*Sodium+1*Chloride+1*Taurine'
				'1*proton+1*L-glutamate(1-)'	'3*H2O+3*6-phospho-D-glucono-1,5-lactone'
				'1*proton+1*Glycine+1*Succinyl-CoA'	'3*proton+1*L-ascorbate+2*superoxide'
				'1*proton+1*H2O+1*L-1-Pyrroline-3-hydroxy-5-carboxylate'	'3*proton+1*H2O+1*ATP(4-)'
				'1*proton+1*Nicotinamide adenine dinucleotide phosphate - reduced+1*trans,cis-deca-2,4-dienoyl-CoA'	'3*Bicarbonate+1*Sodium'
				'1*proton+1*Nicotinamide adenine dinucleotide phosphate - reduced+1*2-Oxoglutarate+1*Ammonium'	'4*proton+1*ADP+1*hydrogenphosphate'
				'1*proton+1*Nicotinamide adenine dinucleotide phosphate - reduced+1*trans-Dec-2-enoyl-CoA'	'5*H2O+5*Coenzyme A+5*Nicotinamide adenine dinucleotide+4*Flavin adenine dinucleotide oxidized+1*Octadecenoyl-CoA (n-C18:1CoA)'
				'1*proton+1*pyruvate+1*lipoamide'	'7*H2O+7*Coenzyme A+7*Nicotinamide adenine dinucleotide+7*Flavin adenine dinucleotide oxidized+1*Palmitoyl-CoA (n-C16:0CoA)'
				'1*proton+1*D-glucuronate'
				'1*Bicarbonate+1*bilirubin(2-)+1*Reduced glutathione'
				'1*Bicarbonate+1*Reduced glutathione+1*Leukotriene D4'
				'1*Bicarbonate+1*prostaglandin H2(1-)'
				'1*Bicarbonate+1*3,3'',5-triiodo-L-thyronine'
				'1*Hexadecenoate (n-C16:1)'
				'1*(E)-hexadec-2-enoyl-CoA(4-)+1*H2O'
				'1*linoleic coenzyme A'
				'1*linoleic coenzyme A'
				'1*L-methionine'
				'1*methylglyoxal'
				'1*Sodium+1*L-ascorbate'
				'1*Sodium+1*L-ascorbate'
				'1*Nicotinamide adenine dinucleotide+1*2-Oxobutanoate+1*Coenzyme A'
				'1*Nicotinamide adenine dinucleotide+1*7,8-Dihydrofolate'
				'1*Nicotinamide adenine dinucleotide+1*(R)-lactaldehyde'
				'1*Nicotinamide adenine dinucleotide+1*L-proline'
				'1*Nicotinamide adenine dinucleotide+1*Spermidine'
				'1*Nicotinamide adenine dinucleotide+1*Isocitrate'
				'1*Nicotinamide adenine dinucleotide'
				'1*Nicotinamide adenine dinucleotide+1*Coenzyme A+1*Palmitoyl-CoA (n-C16:0CoA)+1*O2+1*H2O'
				'1*Nicotinamide adenine dinucleotide phosphate+1*Stearoyl-CoA (n-C18:0CoA)'
				'1*Nicotinamide adenine dinucleotide phosphate+1*Decanoyl-CoA (n-C10:0CoA)'
				'1*Nicotinamide adenine dinucleotide phosphate'
				'1*Nicotinamide adenine dinucleotide phosphate - reduced+1*dehydroascorbide(1-)'
				'1*O2+2*13-cis-retinoate'
				'1*O2'
				'1*Superoxide anion'
				'1*Octanoyl-CoA (n-C8:0CoA)+1*L-Carnitine'
				'1*octadecenoate (n-C18:1)'
				'1*Orotate'
				'1*phosphatidylinositol 4,5-bisphosphate'
				'1*phosphatidylinositol 4,5-bisphosphate'
				'1*propionyl-carnitine'
				'1*phosphatidylethanolamine'
				'1*Phosphoenolpyruvate+1*cis-aconitate(3-)'
				'1*hydrogenphosphate'
				'1*hydrogenphosphate+1*Adenosine'
				'1*hydrogenphosphate+1*GDP+1*Succinyl-CoA'
				'1*Palmitoyl-CoA (n-C16:0CoA)+1*L-Carnitine'
				'1*Propanoyl-CoA'
				'1*diphosphate(3-)'
				'1*Diphosphate'
				'1*pyruvate+1*L-glutamine'
				'1*pyruvate+1*D-3-Amino-isobutanoate'
				'1*pyruvate+1*ATP(4-)+1*Bicarbonate'
				'1*ubiquinone-10+1*Decanoyl-CoA (n-C10:0CoA)'
				'1*alpha-D-Ribose 1-phosphate'
				'1*all-trans-retinoate'
				'1*all-trans-retinoate+1*UDP-D-glucuronate'
				'1*L-serine'
				'1*Spermidine'
				'1*stearidonic acid C18:4, n-3'
				'1*Succinate+1*cis-aconitate(3-)'
				'1*Succinate+1*cis-aconitate(3-)'
				'1*Taurine'
				'1*taurocholic acid'
				'1*UDP+1*dCDP'
				'1*UDP(3-)+1*ADP(3-)'
				'1*UDPglucose'
				'1*UDP-D-galactose(2-)+1*D-Glucose 1-phosphate'
				'1*Xanthine+1*alpha-D-Ribose 1-phosphate'
				'1*D-xylulose 5-phosphate(2-)+1*D-Erythrose 4-phosphate'
				'1*zymosterol+1*FADH2(2-)'
				'2*Acetyl-CoA'
				'2*Hydrogen peroxide'
				'2*proton+1*Nicotinamide adenine dinucleotide - reduced+1*Succinate'
				'2*proton+1*Nicotinamide adenine dinucleotide phosphate - reduced+1*4-Aminobutanoate'
				'2*O2+2*Nicotinamide adenine dinucleotide phosphate - reduced+1*L-argininium(1+)'
				'3*proton+1*L-ascorbate+2*superoxide'
				'4*H2O+4*Coenzyme A+4*Nicotinamide adenine dinucleotide+3*Flavin adenine dinucleotide oxidized+1*Hexadecenoyl-CoA (n-C16:1CoA)'
				'5*H2O+5*Coenzyme A+5*Nicotinamide adenine dinucleotide+4*Flavin adenine dinucleotide oxidized+1*Octadecenoyl-CoA (n-C18:1CoA)'

## Sheet: B - metabolites
Supplementary Table S4B. Metabolites part of candidate complexes (see Table S4A) whose balancing is lethal in cancerous tissue, but not in healthy tissue and whose concordance module does not include essential reactions in the cancer model.
Compartment abreviations: Cytoplasm - [c], Extracellular - [e], Golgi - [g], Lysosome - [l], Mitochondria - [m], Nucleus - [n], Endoplasmic reticulum - [r], Peroxisome - [x]
breast	gastric	kidney	blood	liver (HCC)	lung (SCC)	lung (AC)	ovarian	pancreas
(1R,2R,3R,4R,5R,6S)-2,3,5,6-tetrahydroxy-4-(phosphonatooxy)cyclohexyl phosphate'	Bicarbonate'	'(2S)-2-azaniumyl-4-{[(1R)-2-{[(2R)-2-[(4S)-4-azaniumyl-4-carboxylatobutanamido]-2-[(carboxylatomethyl)carbamoyl]ethyl]disulfanyl}-1-[(carboxylatomethyl)carbamoyl]ethyl]carbamoyl}butanoate'	'3-Phospho-D-glyceroyl phosphate'	'(2E)-Hexenoyl-CoA'	'(3,4-dihydroxyphenyl)acetate'	'(R)-carnitine'	'(R)-carnitine'	'(2S)-2-azaniumyl-4-{[(1R)-2-{[(2R)-2-[(4S)-4-azaniumyl-4-carboxylatobutanamido]-2-[(carboxylatomethyl)carbamoyl]ethyl]disulfanyl}-1-[(carboxylatomethyl)carbamoyl]ethyl]carbamoyl}butanoate'
'1-phosphatidyl-1D-myo-inositol 3,4-bisphosphate(5-)'	'Reduced glutathione'	'(R)-carnitine'	'5,6,7,8-Tetrahydrofolate'	'(E)-hexadec-2-enoyl-CoA(4-)'	'(S)-3-Hydroxydodecanoyl-CoA'	'1-phosphatidyl-1D-myo-inositol 3-phosphate(3-)'	'(S)-lactaldehyde'	'(R)-lactaldehyde'
'10-formyltetrahydrofolate-[Glu](5)'	'all-trans-retinoate'	'(R)-lactaldehyde'	'ADP'	'(R)-carnitine'	'(S)-lactate'	'2''-deoxycytidine'	'(S)-malate(2-)'	'(S)-lactate'
'2,5-dihydroxybenzoate'	'leukotriene C4(2-)'	'(S)-malate(2-)'	'GTP'	'(R)-lactaldehyde'	'(S)-malate(2-)'	'2-methyl-3-oxopropanoate'	'1-phosphatidyl-1D-myo-inositol 4-phosphate(3-)'	'(S)-malate(2-)'
'2-Oxoglutarate'		'1-phosphatidyl-1D-myo-inositol 4-phosphate(3-)'	'H2O'	'(S)-malate(2-)'	'(S)-methylmalonyl-CoA(5-)'	'5,6,7,8-Tetrahydrofolate'	'1-phosphatidyl-1D-myo-inositol(1-)'	'1-Pyrroline-5-carboxylate'
'3-methyl-2-oxobutanoate'		'1-phosphatidyl-1D-myo-inositol(1-)'	'L-serine'	'1-phosphatidyl-1D-myo-inositol 3,4-bisphosphate(5-)'	'1-phosphatidyl-1D-myo-inositol 5-phosphate(3-)'	'5-Phospho-alpha-D-ribose 1-diphosphate'	'11-cis-retinol'	'1-phosphatidyl-1D-myo-inositol 4-phosphate(3-)'
'3-oxopropanoate'		'10-formyltetrahydrofolate-[Glu](6)'	'Nicotinamide adenine dinucleotide phosphate'	'1-phosphatidyl-1D-myo-inositol 3-phosphate(3-)'	'10-formyltetrahydrofolate(2-)'	'7,8-Dihydrofolate'	'13-cis-retinoate'	'1-phosphatidyl-1D-myo-inositol 5-phosphate(3-)'
'5,10-Methylenetetrahydrofolate'		'2''-deoxyuridine'	'Reduced thioredoxin'	'1-phosphatidyl-1D-myo-inositol 5-phosphate(3-)'	'10-formyltetrahydrofolate-[Glu](6)'	'ADP'	'2-Oxoglutarate'	'1-phosphatidyl-1D-myo-inositol(1-)'
'5-Methyltetrahydrofolate'		'2-Oxoglutarate'	'dGMP'	'13-cis-retinoate'	'2''-deoxycytidine'	'ATP(4-)'	'2-deoxyadenosine'	'13-cis-retinoate'
'5-Phospho-alpha-D-ribose 1-diphosphate'		'3-decenoylcoa'	'phosphatidate(2-)'	'2-Deoxy-D-ribose 1-phosphate'	'2,5-dihydroxybenzoate'	'Ammonium'	'2-methyl-3-oxopropanoate'	'2''-deoxycytidine'
'ADP'		'4,8-dimethylnonanoyl carnitine'	'proton'	'2-Oxobutanoate'	'2-Deoxy-D-ribose 1-phosphate'	'Bicarbonate'	'3-methyl-2-oxobutanoate'	'2-Methylprop-2-enoyl-CoA'
'ATP(3-)'		'4-Aminobutanoate'		'2-Oxoglutarate'	'2-Oxoglutarate'	'CO2'	'3alpha,7alpha,12alpha-trihydroxy-5beta-cholestan-27-al'	'2-Oxobutanoate'
'ATP(4-)'		'5,8-tetradecadienoylcoa'		'2-deoxyadenosine'	'2-methyl-3-oxopropanoate'	'CTP'	'4-Aminobutanoate'	'2-Oxoglutarate'
'Ammonium'		'5-Phospho-alpha-D-ribose 1-diphosphate'		'2-methyl-3-oxopropanoate'	'3,4-Dihydroxymandelaldehyde'	'Chloride'	'4-ammoniobutanal'	'2-methyl-3-oxopropanoate'
'Bicarbonate'		'5alpha-cholest-7-en-3beta-ol'		'2-methylbutanoyl-CoA(4-)'	'3,4-Dihydroxymandelate'	'Citrate'	'5-Amino-1-(5-Phospho-D-ribosyl)imidazole-4-carboxamide'	'3-Oxododecanoyl-CoA'
'CDP(3-)'		'6-O-phosphonato-D-glucono-1,5-lactone(2-)'		'2-methylcrotonoyl-CoA(4-)'	'3,4-Dihydroxyphenylacetaldehyde'	'D-Glucose 1-phosphate'	'5alpha-cholest-7-en-3beta-ol'	'3-Phospho-D-glycerate'
'CMP'		'7,8-Dihydrofolate'		'20-dihydroxyleukotriene B4'	'3-Methoxy-4-hydroxymandelate'	'D-glucitol'	'5alpha-cholest-8-en-3beta-ol'	'3-methyl-2-oxobutanoate'
'CTP'		'ADP'		'20-oxo-leukotriene B4'	'3-Methoxy-4-hydroxyphenylglycolaldehyde'	'D-glucose'	'ADP'	'4-methyl-2-oxopentanoate'
'Chloride'		'ATP(4-)'		'3,3'',5-triiodo-L-thyronine'	'3-Phospho-D-glyceroyl phosphate'	'D-glucuronate'	'ADP(3-)'	'5,10-Methylenetetrahydrofolate'
'Citrate'		'Acetoacetyl-CoA'		'3-Phospho-D-glycerate'	'3-hydroxypyruvate'	'Deoxyguanosine'	'ATP(3-)'	'5-Amino-1-(5-Phospho-D-ribosyl)imidazole-4-carboxamide'
'Coenzyme A'		'Acetyl-CoA'		'3-Phospho-D-glyceroyl phosphate'	'3alpha,7alpha-Dihydroxy-5beta-cholestanate'	'Dihydroxyacetone phosphate'	'ATP(4-)'	'5-Phospho-alpha-D-ribose 1-diphosphate'
'D-Fructose 6-phosphate'		'Ammonium'		'3alpha,7alpha,12alpha-trihydroxy-5beta-cholestan-27-al'	'3alpha,7alpha-dihydroxy-5beta-cholestan-26-al'	'Diphosphate'	'Bicarbonate'	'9-cis-retinoate'
'D-alanine'		'Bicarbonate'		'4-Aminobutanoate'	'4,8-dimethylnonanoyl carnitine'	'GDP'	'CDP'	'ADP'
'D-xylulose 5-phosphate(2-)'		'CDP'		'4-ammoniobutanal'	'4-Aminobutanoate'	'GTP'	'CDP(3-)'	'ADP(3-)'
'Decanoyl-CoA (n-C10:0CoA)'		'CMP'		'7,8-Dihydrofolate'	'4-methyl-2-oxopentanoate'	'Glycerol 3-phosphate'	'CMP'	'AMP'
'FADH2(2-)'		'Chloride'		'7alpha-hydroxy-5beta-cholestan-3-one'	'5,10-Methylenetetrahydrofolate'	'Glycine'	'CTP(4-)'	'ATP(3-)'
'Flavin adenine dinucleotide oxidized'		'Citrate'		'7alpha-hydroxycholest-4-en-3-one'	'5-Phospho-alpha-D-ribose 1-diphosphate'	'Guanine'	'Citrate'	'ATP(4-)'
'Gentisate aldehyde'		'Coenzyme A'		'ADP'	'5-oxoprolinate'	'H2O'	'Coenzyme A'	'Acetoacetyl-CoA'
'Glycine'		'Cytidine'		'ADP(3-)'	'6-phospho-D-glucono-1,5-lactone'	'Hexadecenoate (n-C16:1)'	'D-Glucose 6-phosphate'	'Acetyl-CoA'
'H2O'		'D-galactosyl-N-acylsphingosine'		'AMP'	'7,8-Dihydrofolate'	'Hydrogen peroxide'	'D-glucuronate'	'Adenine'
'Hexadecanoate (n-C16:0)'		'D-glucuronate'		'ATP(3-)'	'9-cis-retinol'	'Hypoxanthine'	'D-xylulose 5-phosphate(2-)'	'Adenosine'
'Hexanoyl-CoA (n-C6:0CoA)'		'Decanoyl-CoA (n-C10:0CoA)'		'ATP(4-)'	'ADP'	'Isocitrate'	'Deoxyuridine'	'Ammonium'
'Hydrogen peroxide'		'Diphosphate'		'Acetyl-CoA'	'ADP(3-)'	'L-aspartate(1-)'	'GDP(3-)'	'Bicarbonate'
'Hypoxanthine'		'Dolichyl phosphate D-mannose, human liver homolog+ '		'Adenosine'	'AMP'	'L-glutamate(1-)'	'GTP(4-)'	'CMP'
'L-alanine'		'FADH2(2-)'		'Ammonium'	'ATP(3-)'	'L-gulonate'	'Glycine'	'CO2'
'L-glutamate(1-)'		'Fe2+'		'Bicarbonate'	'ATP(4-)'	'L-histidine'	'H2O'	'CTP'
'L-gulonate'		'Flavin adenine dinucleotide oxidized'		'CDP'	'Adenosine'	'L-homoserine'	'IDP(3-)'	'Coenzyme A'
'L-homoserine'		'Fumarate'		'CDP(3-)'	'Ammonium'	'L-serine'	'IMP'	'Cytidine'
'L-lysinium(1+)'		'GMP'		'CMP'	'Bicarbonate'	'L-tryptophan'	'ITP(3-)'	'D-3-Amino-isobutanoate'
'L-valine'		'Glyceraldehyde 3-phosphate'		'CMP(2-)'	'CDP'	'Leukotriene D4'	'Isocitrate'	'D-Fructose 1,6-bisphosphate'
'N-[(R)-pantothenoyl]-L-cysteinate'		'Glycerol'		'CO2'	'CO2'	'Malonate'	'L-Carnitine'	'D-Fructose 6-phosphate'
'Nicotinamide adenine dinucleotide'		'Glycerol 3-phosphate'		'Citrate'	'CTP'	'Methylmalonate'	'L-alanine'	'D-glucose'
'Nicotinamide adenine dinucleotide - reduced'		'Glycine'		'Coenzyme A'	'CTP(4-)'	'N-Carbamoyl-L-aspartate'	'L-ascorbate'	'D-xylulose 5-phosphate(2-)'
'Nicotinamide adenine dinucleotide phosphate'		'H2O'		'D-3-Amino-isobutanoate'	'Chloride'	'Nicotinamide adenine dinucleotide'	'L-aspartate(1-)'	'Deoxyguanosine'
'Nicotinamide adenine dinucleotide phosphate - reduced'		'Hexadecenoate (n-C16:1)'		'D-Erythrose 4-phosphate'	'Coenzyme A'	'Nicotinamide adenine dinucleotide - reduced'	'L-glutamate(1-)'	'Diphosphate'
'O2'		'Hexanoyl-CoA'		'D-Fructose 6-phosphate'	'D-Fructose 6-phosphate'	'Nicotinamide adenine dinucleotide phosphate'	'L-glutamine'	'FADH2(2-)'
'Ornithine'		'Hydroxymethylglutaryl-CoA'		'D-Glucose 1-phosphate'	'D-Glucosamine 6-phosphate'	'Nicotinamide adenine dinucleotide phosphate - reduced'	'L-gulonate'	'Flavin adenine dinucleotide oxidized'
'Orotate'		'Hypoxanthine'		'D-Glucose 6-phosphate'	'D-Glucose 1-phosphate'	'Nicotinate D-ribonucleotide'	'L-histidine'	'Flavin adenine dinucleotide reduced'
'Oxidized thioredoxin'		'L-1-Pyrroline-3-hydroxy-5-carboxylate'		'D-glucose'	'D-Mannose'	'O2'	'L-homoserine'	'GMP'
'Propanoyl-CoA'		'L-Carnitine'		'D-glucuronate'	'D-Mannose 1-phosphate'	'Octadecenoyl-CoA (n-C18:1CoA)'	'L-methionine'	'Glycerol 3-phosphate'
'Pyridoxal 5''-phosphate'		'L-Glutamate 5-semialdehyde'		'D-xylulose 5-phosphate(2-)'	'D-galactosyl-N-acylsphingosine'	'Oxaloacetate'	'L-phenylalanine'	'Guanine'
'Reduced thioredoxin'		'L-ascorbate'		'Decanoyl-CoA (n-C10:0CoA)'	'D-glucitol'	'Oxidized thioredoxin'	'L-tyrosine'	'H2O'
'Sodium'		'L-glutamate(1-)'		'Dihydroxyacetone phosphate'	'D-glucose'	'Phosphoenolpyruvate'	'Leukotriene D4'	'Hydrogen peroxide'
'Thymidine'		'L-glutamine'		'Diphosphate'	'D-glucuronate'	'Putrescine'	'Malonate'	'IMP'
'UTP'		'L-histidine'		'FADH2(2-)'	'Deoxyinosine'	'Pyridoxal'	'Nicotinamide adenine dinucleotide'	'ITP(3-)'
'beta-alanine'		'L-homoserine'		'Flavin adenine dinucleotide oxidized'	'Deoxyuridine'	'Pyridoxine'	'Nicotinamide adenine dinucleotide - reduced'	'Isocitrate'
'calcium(2+)'		'L-palmitoylcarnitine'		'Flavin adenine dinucleotide reduced'	'Diphosphate'	'Reduced glutathione'	'Nicotinamide adenine dinucleotide phosphate'	'L-Carnitine'
'cis-deca-4-enoyl-CoA'		'L-phenylalanine'		'GDP'	'Dodecanoyl-CoA (n-C12:0CoA)'	'Reduced thioredoxin'	'Nicotinamide adenine dinucleotide phosphate - reduced'	'L-Glutamate 5-semialdehyde'
'dADP(3-)'		'L-threonine'		'GDP(3-)'	'Dolichyl phosphate D-mannose, human uterine homolog+ '	'Riboflavin'	'O2'	'L-alanine'
'dATP'		'Malonate'		'GMP'	'Farnesyl diphosphate'	'S-Adenosyl-L-homocysteine'	'Propanoyl-CoA'	'L-argininium(1+)'
'dCDP(3-)'		'Malonyl-CoA'		'GTP'	'Flavin adenine dinucleotide oxidized'	'Sodium'	'Riboflavin'	'L-glutamate(1-)'
'dCTP'		'NADH(2-)'		'GTP(4-)'	'Flavin adenine dinucleotide reduced'	'Succinate'	'S-Adenosyl-L-homocysteine'	'L-glutamine'
'dGDP(2-)'		'NMN'		'Glyceraldehyde 3-phosphate'	'Fumarate'	'UDP'	'Succinate'	'L-homoserine'
'dTDP'		'Nicotinamide adenine dinucleotide'		'Glycerol'	'GDP'	'UDP(3-)'	'Succinic semialdehyde'	'L-isoleucine'
'dUDP'		'Nicotinamide adenine dinucleotide - reduced'		'Glycerol 3-phosphate'	'GDP-alpha-D-mannose(2-)'	'UDPglucose'	'Sulfite'	'L-palmitoylcarnitine'
'dUDP(3-)'		'Nicotinamide adenine dinucleotide phosphate'		'Glycine'	'Gentisate aldehyde'	'UMP'	'Superoxide anion'	'L-phenylalanine'
'dUTP'		'Nicotinamide adenine dinucleotide phosphate - reduced'		'H2O'	'Glyceraldehyde 3-phosphate'	'UTP'	'UDP'	'L-proline'
'dolichyl phosphate(2-)+ '		'Nicotinate'		'Hexadecanoate (n-C16:0)'	'Glycine'	'UTP(4-)'	'UDP(3-)'	'Leukotriene D4'
'gamma-linolenate'		'Nicotinate D-ribonucleotide'		'Hexadecenoate (n-C16:1)'	'Guanine'	'acetate'	'UMP'	'Methylmalonate'
'glycochenodeoxycholate'		'O-acetylcarnitine'		'Hexadecenoyl-CoA (n-C16:1CoA)'	'H2O'	'all-trans-retinoate'	'UMP(2-)'	'N-acetyl-D-glucosamine 6-phosphate(2-)'
'keratan sulfate II (core 2-linked), degradation product 3'		'O2'		'Hydrogen peroxide'	'Hexanoyl-CoA'	'alpha-D-Ribose 1-phosphate'	'UTP(4-)'	'NAD(1-)'
'pentaglutamyl folate (THF)'		'Octadecenoyl-CoA (n-C18:1CoA)'		'Isocitrate'	'Hydrogen peroxide'	'arachidonate'	'all-trans-retinoate'	'NADH(2-)'
'potassium'		'Ornithine'		'L-1-Pyrroline-3-hydroxy-5-carboxylate'	'Hypoxanthine'	'arachidonoyl-CoA(4-)'	'arachidate'	'Nicotinamide adenine dinucleotide'
'propionyl-carnitine'		'Phosphatidylcholine'		'L-Carnitine'	'ITP(3-)'	'cis-aconitate(3-)'	'arachidonate'	'Nicotinamide adenine dinucleotide - reduced'
'proton'		'R total 2 position'		'L-Glutamate 5-semialdehyde'	'L-Carnitine'	'dADP(3-)'	'calcidiol'	'Nicotinamide adenine dinucleotide phosphate'
'pyruvate'		'Reduced glutathione'		'L-alanine'	'L-argininium(1+)'	'dCMP(2-)'	'cis-aconitate(3-)'	'Nicotinamide adenine dinucleotide phosphate - reduced'
'trans-Dec-2-enoyl-CoA'		'Sodium'		'L-argininium(1+)'	'L-ascorbate'	'dCTP'	'dADP(3-)'	'Nicotinate D-ribonucleotide'
'ubiquinone-10'		'Stearoyl-CoA (n-C18:0CoA)'		'L-ascorbate'	'L-aspartate(1-)'	'dGDP'	'dCDP'	'Norepinephrine'
'water'		'Succinate'		'L-asparagine'	'L-citrulline'	'dGDP(2-)'	'dCMP'	'O2'
'zymosterol intermediate 2'		'Succinyl-CoA'		'L-glutamate(1-)'	'L-cysteine'	'dTDP'	'dCMP(2-)'	'Octanoyl-CoA (n-C8:0CoA)'
		'Sulfite'		'L-glutamine'	'L-glutamate(1-)'	'dTTP'	'dGDP'	'Orotate'
		'Taurine'		'L-gulonate'	'L-histidine'	'dUMP'	'dGDP(2-)'	'Oxaloacetate'
		'Tetradecanoyl-CoA (n-C14:0CoA)'		'L-histidine'	'L-homoserine'	'dihydrofolate(2-)'	'dGTP'	'Oxidized thioredoxin'
		'UDP'		'L-methionine'	'L-isoleucine'	'glutathionate(1-)'	'dTDP'	'Pantetheine 4''-phosphate'
		'UDP(3-)'		'L-proline'	'L-leucine'	'glycochenodeoxycholate'	'dTMP'	'Phosphatidylcholine'
		'UDPglucose'		'L-serine'	'L-threonine'	'hydrogenphosphate'	'dTTP'	'Pyridoxamine'
		'UMP'		'Leukotriene D4'	'Leukotriene D4'	'leukotriene E4(1-)'	'hydrogenphosphate'	'Reduced glutathione'
		'Uracil'		'Nicotinamide adenine dinucleotide'	'Methylmalonate'	'leukotriene F4'	'hydrogensulfite'	'Reduced thioredoxin'
		'Urate'		'Nicotinamide adenine dinucleotide - reduced'	'N-((R)-4-Phosphopantothenoyl)-L-cysteine'	'oxalate(2-)'	'leukotriene C4(2-)'	'Sodium'
		'Xanthine'		'Nicotinamide adenine dinucleotide phosphate'	'N-[(R)-pantothenoyl]-L-cysteinate'	'palmitate'	'leukotriene E4(1-)'	'Taurine'
		'[(2R,3S,4R,5R)-5-(2,4-dioxo-1,2,3,4-tetrahydropyrimidin-1-yl)-3,4-dihydroxyoxolan-2-yl]methyl {[(3R,4S,5S,6R)-3,4,5-trihydroxy-6-(hydroxymethyl)oxan-2-yl phosphonato]oxy}phosphonate'		'Nicotinamide adenine dinucleotide phosphate - reduced'	'N-acylsphingosine'	'potassium'	'leukotriene F4'	'UDP'
		'adrenic acid'		'O-acetylcarnitine'	'Nicotinamide adenine dinucleotide'	'proton'	'linoleate'	'UDP(3-)'
		'alpha-D-Ribose 1-phosphate'		'O2'	'Nicotinamide adenine dinucleotide - reduced'	'pyruvate'	'methylglyoxal'	'UDP-D-galactose(2-)'
		'alpha-D-Ribose 5-phosphate'		'Octadecenoyl-CoA (n-C18:1CoA)'	'Nicotinamide adenine dinucleotide phosphate'	'sulfate'	'phosphatidylglycerol(1-)'	'UDPglucose'
		'arachidonate'		'Octanoyl-CoA (n-C8:0CoA)'	'Nicotinamide adenine dinucleotide phosphate - reduced'	'taurocholic acid'	'prostaglandin H2(1-)'	'UMP'
		'bilirubin(2-)'		'Ornithine'	'Nicotinate'		'prostaglandin I2(1-)'	'UMP(2-)'
		'chenodeoxycholoyl coenzyme a'		'Orotate'	'O2'		'proton'	'UTP'
		'cholesterol'		'Oxaloacetate'	'O2''-4a-cyclic-tetrahydrobiopterin'		'pyruvate'	'UTP(4-)'
		'choloyl-CoA(4-)'		'Palmitoyl-CoA (n-C16:0CoA)'	'Octadecenoyl-CoA (n-C18:1CoA)'		'quinonoid dihydrobiopterin'	'Ubiquinol-10'
		'dADP'		'Phosphatidylcholine'	'Octanoyl-CoA (n-C8:0CoA)'		'stearidonic acid C18:4, n-3'	'Xanthine'
		'dADP(3-)'		'Phosphoenolpyruvate'	'Ornithine'		'taurocholic acid'	'[(2R,3S,4R,5R)-5-(2,4-dioxo-1,2,3,4-tetrahydropyrimidin-1-yl)-3,4-dihydroxyoxolan-2-yl]methyl {[(3R,4S,5S,6R)-3,4,5-trihydroxy-6-(hydroxymethyl)oxan-2-yl phosphonato]oxy}phosphonate'
		'dATP'		'Propanoyl-CoA'	'Palmitoyl-CoA (n-C16:0CoA)'			'acetoacetate'
		'dCDP'		'Pyridoxine'	'Phosphatidylcholine'			'all-trans-retinal'
		'dGDP'		'Reduced glutathione'	'Pyridoxamine 5''-phosphate'			'alpha-D-Ribose 1-phosphate'
		'dGDP(2-)'		'S-Adenosyl-L-homocysteine'	'Reduced glutathione'			'alpha-D-Ribose 5-phosphate'
		'dTDP'		'S-Adenosyl-L-methionine'	'S-Adenosyl-L-homocysteine'			'alpha-linolenate'
		'dTTP'		'Sodium'	'S-Adenosyl-L-methionine'			'beta-alanine'
		'dUTP'		'Spermidine'	'Sodium'			'cis-aconitate(3-)'
		'dihomo-gamma-linolenic acid (n-6)'		'Stearoyl-CoA (n-C18:0CoA)'	'Succinate'			'dATP'
		'elaidate'		'Succinate'	'Succinic semialdehyde'			'dCMP(2-)'
		'glutathionate(1-)'		'Succinic semialdehyde'	'Sulfite'			'dCTP'
		'glycochenodeoxycholate'		'Succinyl-CoA'	'Taurine'			'dGDP(2-)'
		'hexaglutamyl folate (THF)'		'Superoxide anion'	'Tetradecanoyl-CoA (n-C14:0CoA)'			'dGTP'
		'hexaglutamyl folate (DHF)'		'Taurine'	'Thiamine diphosphate'			'dIDP'
		'hydrogenphosphate'		'Thiamin'	'Tn antigen'			'dITP(4-)'
		'hydrogensulfite'		'UDP'	'UDP'			'dUDP'
		'keratan sulfate I, degradation product 14'		'UDP(3-)'	'UDP(3-)'			'dUTP'
		'keratan sulfate I, degradation product 17'		'UDP-D-galactose(2-)'	'UDP-D-galactose(2-)'			'dihomo-gamma-linolenic acid (n-6)'
		'keratan sulfate I, degradation product 24'		'UDP-D-glucuronate'	'UDP-D-glucuronate'			'diphosphate(3-)'
		'linoleate'		'UDPglucose'	'UDP-N-acetyl-D-galactosamine(2-)'			'elaidate'
		'linoleic coenzyme A'		'UMP(2-)'	'UMP'			'glycocholate'
		'pentaglutamyl folate (THF)'		'UTP'	'UMP(2-)'			'hydrogenphosphate'
		'phosphatidylinositol 4,5-bisphosphate'		'Ubiquinol-10'	'acetaldehyde'			'lignocerate'
		'prostaglandin H2(1-)'		'Uracil'	'alpha-D-Ribose 1-phosphate'			'pantetheine'
		'prostaglandin I2(1-)'		'Xanthine'	'arachidate'			'pantetheine 4''-phosphate(2-)'
		'proton'		'acetoacetate'	'arachidyl coenzyme A'			'phosphatidate(2-)'
		'ps_hs[c]'		'acetoacetyl-CoA(4-)'	'bilirubin(2-)'			'phosphatidylethanolamine'
		'sulfate'		'all-trans-retinoate'	'bis(beta-glucosyluronate)bilirubin'			'pristanoyl coa'
		'taurochenodeoxycholate'		'alpha-D-Ribose 1-phosphate'	'choline phosphate(1-)'			'proton'
		'taurocholic acid'		'arachidonate'	'cis-aconitate(3-)'			'pyruvate'
		'trans-4-hydroxy-L-proline'		'bilirubin(2-)'	'creatine'			'stearidonic acid C18:4, n-3'
		'trimethylenediaminium'		'bis(beta-glucosyluronate)bilirubin'	'dADP'			'taurochenodeoxycholate'
		'ubiquinone-10'		'butyrate'	'dADP(3-)'			'trans,cis-Lauro-2,6-dienoyl-CoA'
		'water'		'cholesterol'	'dAMP(2-)'			'trans-Dodec-2-enoyl-CoA'
		'xanthosine'		'choloyl-CoA(4-)'	'dATP'			'trans-Hexadec-2-enoyl-CoA'
				'cis,cis-myristo-5,8-dienoyl-CoA'	'dCDP'			'ubiquinone-10'
				'cis-aconitate(3-)'	'dCDP(3-)'			'water'
				'dADP(3-)'	'dCMP'			'xylitol'
				'dATP'	'dCMP(2-)'			'zymosterol'
				'dCDP'	'dGDP'
				'dCDP(3-)'	'dGDP(2-)'
				'dCMP'	'dGMP'
				'dCMP(2-)'	'dGTP'
				'dCTP'	'dTDP'
				'dGDP'	'dTTP'
				'dGDP(2-)'	'dUDP'
				'dGMP'	'dUDP(3-)'
				'dGTP'	'dUTP'
				'dIDP'	'dehydroascorbide(1-)'
				'dTDP'	'desmosterol'
				'dTTP'	'diglyceride'
				'dUMP(2-)'	'dolichyl phosphate(2-)+ '
				'dUTP'	'glutathionate(1-)'
				'dehydroascorbide(1-)'	'hexaglutamyl folate (DHF)'
				'dihomo-gamma-linolenic acid (n-6)'	'hydrogenphosphate'
				'diphosphate(3-)'	'hydrogensulfite'
				'elaidate'	'keratan sulfate I, degradation product 32'
				'estradiol'	'leukotriene A4(1-)'
				'fatty acid 11-cis-retinol'	'leukotriene E4(1-)'
				'glycine'	'linoelaidyl coenzyme A'
				'glycochenodeoxycholate'	'linoleate'
				'histamium'	'linoleic coenzyme A'
				'hydrogenphosphate'	'octadecenoate (n-C18:1)'
				'hydroxyacetone'	'palmitate'
				'linoleic coenzyme A'	'phosphatidate(2-)'
				'lipoamide'	'phosphatidylinositol 4,5-bisphosphate'
				'methylglyoxal'	'phytanoyl-CoA(4-)'
				'octadecenoate (n-C18:1)'	'presqualene diphosphate(3-)'
				'oxalate(2-)'	'propionyl-carnitine'
				'palmitate'	'proton'
				'pantetheine'	'pyruvate'
				'phosphatidylethanolamine'	'retinal'
				'phosphatidylinositol 4,5-bisphosphate'	'superoxide'
				'phytanoyl-CoA(4-)'	'taurocholic acid'
				'potassium'	'trans-Dec-2-enoyl-CoA'
				'propionyl-carnitine'	'trans-dodec-2-enoyl-CoA(4-)'
				'prostaglandin H2(1-)'	'ubiquinone-10'
				'proton'	'vaccenyl coenzyme A'
				'pyruvate'	'water'
				'retinal'
				'stearate'
				'stearidonic acid C18:4, n-3'
				'superoxide'
				'taurocholate'
				'taurocholic acid'
				'trans,cis-deca-2,4-dienoyl-CoA'
				'trans-2-cis,cis-5,8-tetradecatrienoyl-CoA'
				'trans-Dec-2-enoyl-CoA'
				'trans-Octadec-2-enoyl-CoA'
				'ubiquinone-10'
				'vaccenyl coenzyme A'
				'zymosterol'

## Sheet: C - single mets complexes
Supplementary Table S4C. Metabolites part of candidate complexes (see Table S4A) that contain a single metabolite only, whose balancing is lethal in cancerous tissue, but not in healthy tissue and whose concordance module does not include essential reactions in the cancer model.
Compartment abreviations: Cytoplasm - [c], Extracellular - [e], Golgi - [g], Lysosome - [l], Mitochondria - [m], Nucleus - [n], Endoplasmic reticulum - [r], Peroxisome - [x]
breast	gastric	kidney	blood	liver (HCC)	lung (SCC)	lung (AC)	ovarian	pancreas
'10-formyltetrahydrofolate-[Glu](5)'	'all-trans-retinoate'	'1-phosphatidyl-1D-myo-inositol4-phosphate(3-)'		'(R)-carnitine'	'(S)-3-Hydroxydodecanoyl-CoA'	'5,6,7,8-Tetrahydrofolate'	'(S)-malate(2-)'	'1-phosphatidyl-1D-myo-inositol4-phosphate(3-)'
'D-alanine'		'10-formyltetrahydrofolate-[Glu](6)'		'2-Deoxy-D-ribose1-phosphate'	'10-formyltetrahydrofolate-[Glu](6)'	'ATP(4-)'	'1-phosphatidyl-1D-myo-inositol4-phosphate(3-)'	'3-Phospho-D-glycerate'
'D-xylulose5-phosphate(2-)'		'3-decenoylcoa'		'2-deoxyadenosine'	'3alpha,7alpha-Dihydroxy-5beta-cholestanate'	'CO2'	'13-cis-retinoate'	'3-methyl-2-oxobutanoate'
'FADH2(2-)'		'4,8-dimethylnonanoylcarnitine'		'20-dihydroxyleukotrieneB4'	'4,8-dimethylnonanoylcarnitine'	'Citrate'	'2-deoxyadenosine'	'4-methyl-2-oxopentanoate'
'Flavinadeninedinucleotideoxidized'		'4-Aminobutanoate'		'3-Phospho-D-glycerate'	'ADP'	'D-glucose'	'3-methyl-2-oxobutanoate'	'5-Amino-1-(5-Phospho-D-ribosyl)imidazole-4-carboxamide'
'Nicotinamideadeninedinucleotidephosphate'		'7,8-Dihydrofolate'		'3-Phospho-D-glyceroylphosphate'	'D-Glucose1-phosphate'	'D-glucuronate'	'5-Amino-1-(5-Phospho-D-ribosyl)imidazole-4-carboxamide'	'D-Fructose6-phosphate'
'Nicotinamideadeninedinucleotidephosphate-reduced'		'Ammonium'		'4-Aminobutanoate'	'Deoxyinosine'	'Deoxyguanosine'	'5alpha-cholest-7-en-3beta-ol'	'Glycerol3-phosphate'
'Propanoyl-CoA'		'GMP'		'ADP'	'Diphosphate'	'Dihydroxyacetonephosphate'	'ADP'	'L-Carnitine'
'gamma-linolenate'		'Glyceraldehyde3-phosphate'		'ADP(3-)'	'Farnesyldiphosphate'	'Glycerol3-phosphate'	'CoenzymeA'	'L-isoleucine'
'pentaglutamylfolate(THF)'		'Glycerol3-phosphate'		'Acetyl-CoA'	'GDP-alpha-D-mannose(2-)'	'H2O'	'D-Glucose6-phosphate'	'L-phenylalanine'
'propionyl-carnitine'		'Glycine'		'CoenzymeA'	'Hydrogenperoxide'	'Hexadecenoate(n-C16:1)'	'D-xylulose5-phosphate(2-)'	'N-acetyl-D-glucosamine6-phosphate(2-)'
'proton'		'Hydroxymethylglutaryl-CoA'		'D-glucose'	'L-aspartate(1-)'	'Isocitrate'	'Glycine'	'Nicotinamideadeninedinucleotide'
		'L-Glutamate5-semialdehyde'		'Dihydroxyacetonephosphate'	'L-isoleucine'	'L-aspartate(1-)'	'L-ascorbate'	'Norepinephrine'
		'L-ascorbate'		'Diphosphate'	'N-[(R)-pantothenoyl]-L-cysteinate'	'L-histidine'	'L-glutamine'	'Octanoyl-CoA(n-C8:0CoA)'
		'L-phenylalanine'		'FADH2(2-)'	'Octanoyl-CoA(n-C8:0CoA)'	'L-serine'	'L-gulonate'	'Orotate'
		'Nicotinamideadeninedinucleotidephosphate'		'Flavinadeninedinucleotideoxidized'	'Reducedglutathione'	'LeukotrieneD4'	'L-histidine'	'Phosphatidylcholine'
		'O2'		'Glycerol3-phosphate'	'S-Adenosyl-L-homocysteine'	'N-Carbamoyl-L-aspartate'	'LeukotrieneD4'	'Reducedglutathione'
		'Rtotal2position'		'H2O'	'S-Adenosyl-L-methionine'	'Putrescine'	'Nicotinamideadeninedinucleotide'	'UDPglucose'
		'Urate'		'Hexadecenoate(n-C16:1)'	'UDP-D-glucuronate'	'Riboflavin'	'Nicotinamideadeninedinucleotidephosphate-reduced'	'alpha-linolenate'
		'[(2R,3S,4R,5R)-5-(2,4-dioxo-1,2,3,4-tetrahydropyrimidin-1-yl)-3,4-dihydroxyoxolan-2-yl]methyl{[(3R,4S,5S,6R)-3,4,5-trihydroxy-6-(hydroxymethyl)oxan-2-ylphosphonato]oxy}phosphonate'		'Hydrogenperoxide'	'bilirubin(2-)'	'S-Adenosyl-L-homocysteine'	'Propanoyl-CoA'	'beta-alanine'
		'alpha-D-Ribose1-phosphate'		'L-Glutamate5-semialdehyde'	'creatine'	'UDP'	'Riboflavin'	'dATP'
		'alpha-D-Ribose5-phosphate'		'L-alanine'	'dATP'	'UMP'	'S-Adenosyl-L-homocysteine'	'dGTP'
		'bilirubin(2-)'		'L-asparagine'	'leukotrieneA4(1-)'	'arachidonate'	'UDP(3-)'	'dIDP'
		'chenodeoxycholoylcoenzymea'		'L-gulonate'	'octadecenoate(n-C18:1)'	'hydrogenphosphate'	'all-trans-retinoate'	'dITP(4-)'
		'hexaglutamylfolate(DHF)'		'L-methionine'	'water'	'leukotrieneF4'	'arachidate'	'dihomo-gamma-linolenicacid(n-6)'
		'hexaglutamylfolate(THF)'		'L-serine'		'palmitate'	'arachidonate'	'diphosphate(3-)'
		'pentaglutamylfolate(THF)'		'Nicotinamideadeninedinucleotide'		'potassium'	'calcidiol'	'elaidate'
		'ps_hs[c]'		'Nicotinamideadeninedinucleotidephosphate'		'taurocholicacid'	'dTMP'	'glycocholate'
		'taurochenodeoxycholate'		'O-acetylcarnitine'			'dTTP'	'lignocerate'
				'O2'			'hydrogenphosphate'	'phosphatidylethanolamine'
				'Orotate'			'leukotrieneC4(2-)'	'pristanoylcoa'
				'Propanoyl-CoA'			'leukotrieneE4(1-)'	'taurochenodeoxycholate'
				'S-Adenosyl-L-homocysteine'			'leukotrieneF4'	'trans,cis-Lauro-2,6-dienoyl-CoA'
				'Spermidine'			'phosphatidylglycerol(1-)'
				'Superoxideanion'			'proton'
				'Taurine'			'quinonoiddihydrobiopterin'
				'UDPglucose'			'stearidonicacidC18:4,n-3'
				'all-trans-retinoate'			'taurocholicacid'
				'alpha-D-Ribose1-phosphate'
				'arachidonate'
				'bilirubin(2-)'
				'bis(beta-glucosyluronate)bilirubin'
				'dGMP'
				'dIDP'
				'dihomo-gamma-linolenicacid(n-6)'
				'diphosphate(3-)'
				'elaidate'
				'estradiol'
				'glycochenodeoxycholate'
				'hydrogenphosphate'
				'linoleiccoenzymeA'
				'methylglyoxal'
				'octadecenoate(n-C18:1)'
				'phosphatidylethanolamine'
				'phosphatidylinositol4,5-bisphosphate'
				'propionyl-carnitine'
				'stearidonicacidC18:4,n-3'
				'taurocholicacid'
				'trans-2-cis,cis-5,8-tetradecatrienoyl-CoA'
