# Supplementary material for: Imposing multireaction dependencies provides an innovative strategy to alter metabolic functions
Source: Research Square preprint supplement (doi:10.21203/rs.3.rs-6304455/v1), 2025-04-15
Supplement: Supplementary file 1 [file 6b1123dbaa6c633016a42d6f.pdf]

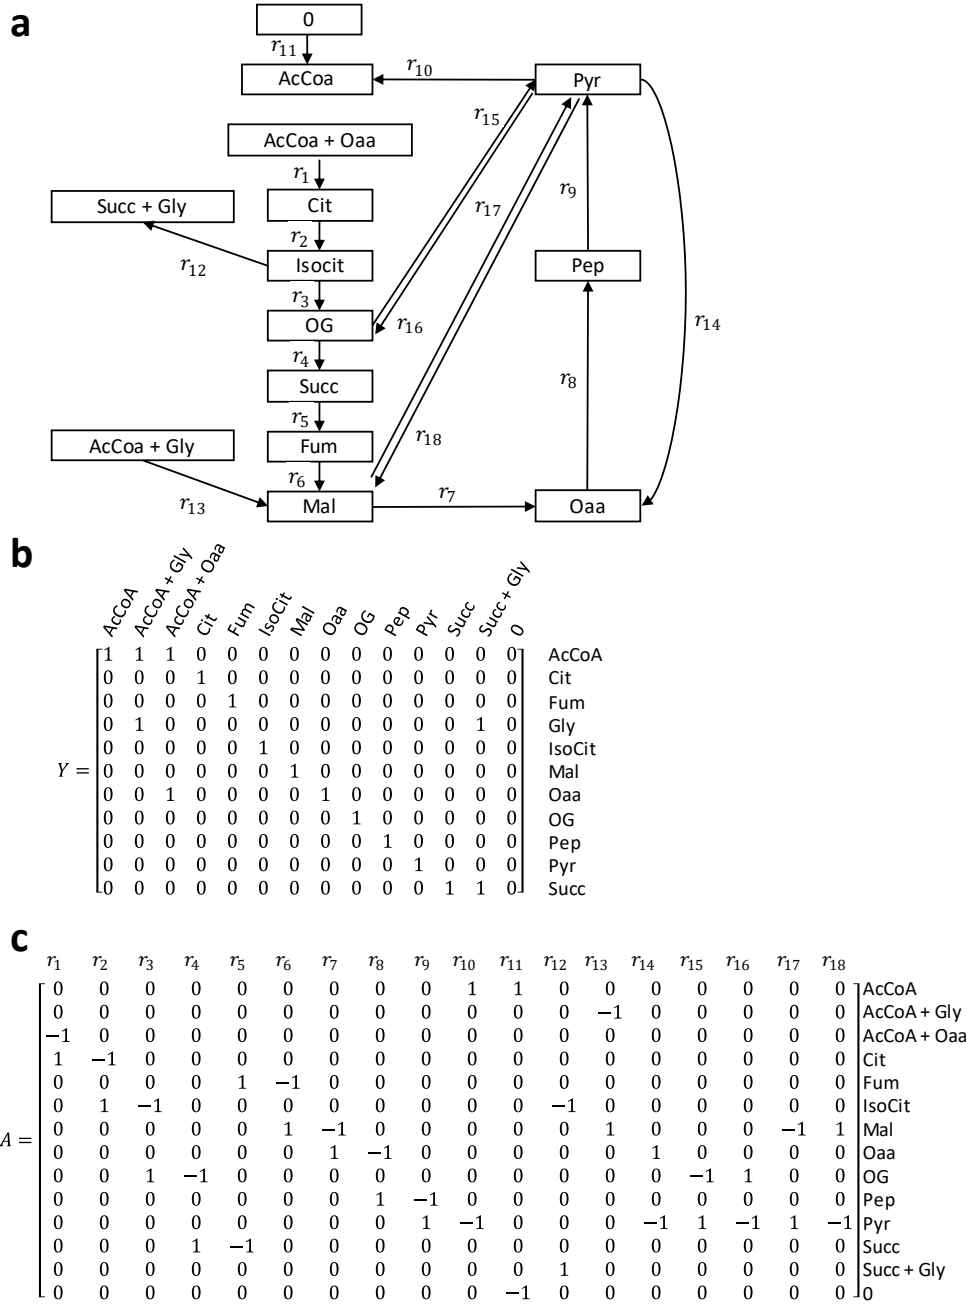

**Supplementary Figure S1. Illustration of concepts related to balancing of complexes. (a)** Network including 11 species (AcCoA, - Acetyl-CoA, Cit - Citrate, Fum - Fumarate, Gly - Glyoxalate, Isocit - Isocitrate, Mal - Malate, Oaa - Oxaloacetate, OG - Oxoglutarate, Pep - Phosphoenolpyruvate, Pyr - Pyruvate, Succ - Succinate, 0 - zero-complex), 14 complexes including the zero-complex that models the interaction with the environment, depicted as rectangles, and 18 irreversible reactions,  $r_1 - r_{18}$ , each connecting two complexes. **(b)** Species-complex matrix  $Y$  of the network in **(a)**, where rows correspond to species and column correspond to complexes. Each entry indicates the molarity with which a species participates in a complex. **(c)** Incidence matrix  $A$  of the directed graph given in **(a)**. The stoichiometric matrix of the network is then given by the product of the species-complex matrix and the incidence matrix,  $N = Y \cdot A$ .



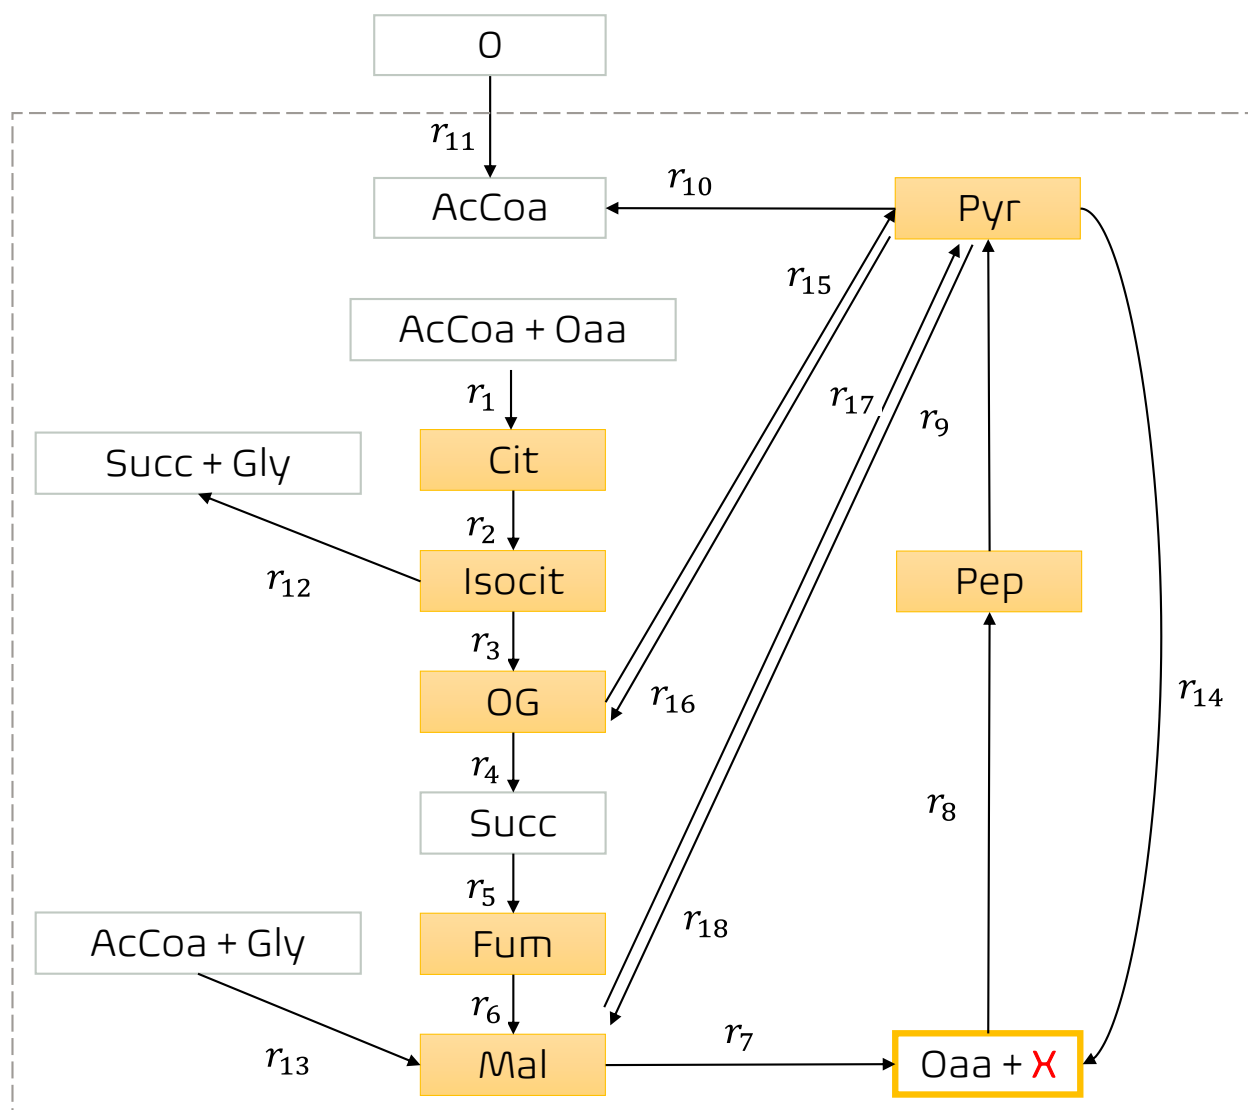

**Supplementary Figure S3. Illustration of balancing complexes by inclusion of phantom-species.** The complex  $1 \cdot \text{Oaa}$  being unbalanced in the original example network (see Supplementary Figure S1) becomes balanced by introducing phantom species X. The resulting complex  $1 \cdot \text{Oaa} + 1 \cdot \text{X}$  is trivially balanced as species X does not appear in any other complex in the network. Balanced complexes are shown in yellow. The balancing complex is marked by a yellow box. Metabolite abbreviations: AcCoA, - Acetyl-CoA, Cit – Citrate, Fum – Fumarate, Gly - Glycolate, Isocit – Isocitrate, Mal – Malate, Oaa – Oxaloacetate, OG – Oxoglutarate, Pep – Phosphoenolpyruvate, Pyr – Pyruvate, Succ – Succinate, 0 – zero-complex.
