# Supplementary material for: Imposing multireaction dependencies provides an innovative strategy to alter metabolic functions
Source: Research Square preprint supplement (doi:10.21203/rs.3.rs-6304455/v1), 2025-04-15
Supplement: Supplementary file 2 [file 1f939d3edeb516f5b7a1fedf.xlsx]

## Sheet: Sheet1
Supplementary Table S2. Parameter values that best fit balancing distributions of organism-specific networks for four different distributions. The provided p-values are based on two-sample Kolmogorov-Smirnov test. As descibed in Broido et al. (Nat Comms. 2019) fit of alternative distributions in comparison to power law are evaluated using likelihood-ratio test (1 - power law better, 0 - inconclus…
	power law			power law with exponential cut off				exponential			log-normal				streched exponential
	f(x) = x^-a			f(x) = x^-a e^-bx				f(x) = e^-bx			f(x) = 1 / x * e^( (log(x)-mu)^2 / 2*sigma^2)				f(x) = e^(x / b)^a
	a	p-value KS test		a	b	p-value KS test		a	p-value KS test		mu	sigma	p-value KS		a	b	p-value KS
A. niger (iMA871)	1.74	0.00305436		1.72998	0.001317	0.00305436		0.121281	0.00305436		-183.896	14.264	7.87536e-20		0.226	0.01	0.00132405
A. thaliana (AraCore)	1.4	1.60719e-12		1.08591	0.005957	0.059153		0.038136	7.66095e-18		-1.497	3.261	6.3389e-35		0.242	0.441	3.46457e-14
C. reinhardtii (iCre1355)	1.67	0.0281936		1.58015	0.003891	0.0724459		0.115975	0.000409338		-145.246	13.455	1.03831e-32		1	0.01	1.03831e-32
E. coli (iJO1366)	1.68	0.00299695		1.66055	0.001511	0.0015896		0.100247	9.36784e-05		-14.991	4.628	1.03831e-32		1	0.01	1.03831e-32
M. acetivorans (iMB745)	1.95	0.0276882		1.93273	0.00316	0.0131704		0.273305	0.00099223		-240	14.318	3.73608e-17		0.354	0.133	0.0131704
M. barkeri (iAF692)	2.14	0.530908		2.15981	0.002982	0.530908		0.434867	0.0705825		-213	12.287	1.96643e-10		0.285	0.01	1.56761e-05
M. musculus	1.57	1.58476e-08		1.50917	0.001175	3.16854e-06		0.052008	1.02221e-07		-211.334	17.762	6.60139e-39		0.277	0.371	3.27784e-11
M. tuberculosis (iNJ661m)	1.71	0.0670039		1.60121	0.007059	0.115242		0.156591	0.0196566		-42.46	7.182	3.63129e-21		0.309	0.153	0.43732
N. pharaonis	1.48	3.69273e-08		1.33404	0.00293	9.8089e-06		0.046907	2.66652e-07		-6.95	4.239	3.74411e-33		0.216	0.077	1.31556e-08
P. putida (iJN746)	1.35	5.32198e-25		1.16795	0.001058	2.62665e-19		0.013129	3.13969e-34		-7.948	5.497	2.31326e-54		0.798	0.01	2.31326e-54
T. maritima (iLJ478)	1.27	1.68959e-35		0.847171	0.002185	4.91329e-11		0.008817	1.25316e-52		2.146	2.978	6.87096e-58		0.0383	33.97	5.38748e-57
S. cerevesiae (Yeast8)	1.79	0.000357775		1.86025	0.000669	2.29623e-05		0.060051	2.65305e-11		-2.933	2.676	3.11205e-40		0.352	0.902	8.82428e-12
	power law with exponential cut off	exponential	log-normal	streched exponential
A. niger (iMA871)	-1	1	1	1
A. thaliana (AraCore)	-1	1	-1	-1
C. reinhardtii (iCre1355)	-1	1	1	-1
E. coli (iJO1366)	-1	1	2	-1
M. acetivorans (iMB745)	-1	1	1	1
M. barkeri (iAF692)	0	1	1	1
M. musculus	-1	1	1	1
M. tuberculosis (iNJ661m)	-1	1	1	1
N. pharaonis	-1	1	-1	0
P. putida (iJN746)	-1	2	0	-1
T. maritima (iLJ478)	-1	1	2	-1
S. cerevesiae (Yeast8)	-1	1	-1	0
