# Supplementary material for: Imposing multireaction dependencies provides an innovative strategy to alter metabolic functions
Source: Research Square preprint supplement (doi:10.21203/rs.3.rs-6304455/v1), 2025-04-15
Supplement: Supplementary file 3 [file 7e236ed0dc9ee1b99157faca.xlsx]

## Sheet: Sheet1
Supplementary Table S1. Top 10 complexes with highest balancing potential across twelve organisms from all kingdoms of life.
'A. niger iMA871'	'A. thaliana AraCore'	'C. reinhardtii iCre1355'	'E. coli iJO1366'	'M. acetivorans iMB745'	M. barkeri iAF692'	'M. musculus'	'M. tuberculosis iNJ661m'	'N. pharaonis'	'P. putida iJN746'	'T. maritima iLJ478'	'S. cerevesiae Yeast8'
'ATP+Biotin-carboxyl-carrier protein+CO2+H2O'	'Adenosine triphosphate+Coenzyme A+Acetate'	'O2'	'CO2+H2O'	'dhap[c]'	'M_2_Oxoglutarate_C5H4O5+M_L_Aspartate_C4H6NO4'	'NADPH+H++But-2-enoyl-[acyl-carrier protein]'	'H2O+Diphosphate'	'H2O+ATP'	'ATP+Shikimate'	'ATP C10H12N5O13P3+L-Glutamate+Ammonium'	'ADP [cytoplasm]'
'ADP+Carboxybiotin-carboxyl-carrier protein+Orthophosphate'	'H+, proton+Diphosphate, Pyrophosphate+Adenosine 5-phosphate+Acetyl-Coenzyme A'	'CO2+H2O'	'H++Bicarbonate'	'g3p[c]'	'M_L_Glutamate_C5H8NO4+M_Oxaloacetate_C4H2O5'	'Butyryl-[acp]'	'H+Phosphate'	'H2O+ATP+Sulfate (E)'	'ADP+H++Shikimate 5-phosphate'	'L-Glutamine+H++ADP C10H12N5O10P2+Phosphate'	'CMP [cytoplasm]'
'Acyl-carrier protein+Malonyl-COA'	'Adenosine triphosphate+Ammonia+Glutamate'	'H++Bicarbonate'	'acyl carrier protein+Malonyl-CoA'	'4pasp[c]+h[c]+nadph[c]'	'M_4_Phospho_L_aspartate_C4H6NO7P+M_H_H+M_Nicotinamide_adenine_dinucleotide_phosphate___reduced_C21H26N7O17P3'	'NADPH+H++3-Oxooctanoyl-[acp]'	'H+Bicarbonate'	'ADP+Orthophosphate+Sulfate+H+'	'(R)-2,3-Dihydroxy-3-methylbutanoate'	'Nicotinamide adenine dinucleotide+Prephenate'	'CMP [endoplasmic reticulum membrane]'
'Coenzyme A+Malonyl-[acp]'	'H+, proton+Adenosine diphosphate+Orthophosphate+Glutamine'	'acyl carrier protein+Malonyl-CoA'	'Coenzyme A+Malonyl-[acyl-carrier protein]'	'aspsa[c]+nadp[c]+pi[c]'	'M_L_Aspartate_4_semialdehyde_C4H7NO3+M_Nicotinamide_adenine_dinucleotide_phosphate_C21H25N7O17P3+M_Phosphate_HO4P'	'Malonyl-[acyl-carrier protein]+Butyryl-[acp]'	'alpha-D-Ribose-5-phosphate'	'Porphobilinogen+H2O'	'3-Methyl-2-oxobutanoate+H2O'	'3-(4-Hydroxyphenyl)pyruvate+CO2 CO2+Nicotinamide adenine dinucleotide - reduced'	'CTP [cytoplasm]'
'Acetyl-CoA+Carboxybiotin-carboxyl-carrier protein'	'Adenosine triphosphate+Ribose 5-phosphate'	'Coenzyme A+Malonyl-[acyl-carrier protein]'	'Acetyl-CoA+ATP+Bicarbonate'	'fald[c]+ru5p-D[c]'	'M_L_Aspartate_C4H6NO4+M_ATP_C10H12N5O13P3'	'CO2+Acyl-carrier protein+3-Oxohexanoyl-[acp]'	'Acetyl-CoA+ATP+Bicarbonate'	'NH3+Hydroxymethylbilane'	'5-O-(1-Carboxyvinyl)-3-phosphoshikimate'	'H++Nicotinamide adenine dinucleotide phosphate - reduced+Oxidized thioredoxin'	'CTP [endoplasmic reticulum membrane]'
'Biotin-carboxyl-carrier protein+Malonyl-COA'	'H+, proton+5-Phosphoribosyl 1-pyrophosphate+Adenosine 5-phosphate'	'H2O+Diphosphate'	'ADP+H++Malonyl-CoA+Phosphate'	'f6p[c]'	'M_4_Phospho_L_aspartate_C4H6NO7P+M_ADP_C10H12N5O10P2'	'NADPH+3-Oxohexanoyl-[acp]'	'ADP+H+Malonyl-CoA+Phosphate'	'ATP+L-Glutamate+tRNA(Glu)'	'chorismate+Phosphate'	'Nicotinamide adenine dinucleotide phosphate+Reduced thioredoxin'	'phosphate [cytoplasm]'
'3-hydroxybutanoyl-CoA+NAD(+)'	'Nicotinamide adenine dinucleotide+Malate'	'Phosphate'	'ATP+UDP'	'fdp[c]+h2o[c]'	'M_L_Serine_C3H7NO3+M_5_6_7_8_Tetrahydrofolate_C19H21N7O6'	'NADPH+trans-Hex-2-enoyl-[acp]'	'D-Erythrose-4-phosphate+H2O+Phosphoenolpyruvate'	'Pyrophosphate+L-Glutamyl-tRNA(Glu)+AMP+H+'	'(R)-2,3-Dihydroxy-3-methylpentanoate'	'L-Cysteine+O-Succinyl-L-homoserine'	'H2O [lipid particle]'
'Acetoacetyl-CoA+NADH'	'H+, proton+Nicotinamide adenine dinucleotide - reduced+Oxaloacetate'	'D-Glucose 1-phosphate+H++UTP'	'ADP+UTP'	'f6p[c]+pi[c]'	'M_Glycine_C2H5NO2+M_H2O_H2O+M_5_10_Methylenetetrahydrofolate_C20H21N7O6'	'Hexanoyl-[acp]'	'2-Dehydro-3-deoxy-D-arabino-heptonate-7-phosphate+Phosphate'	'D-Fructose 6-phosphate+L-Glutamine'	'(S)-3-Methyl-2-oxopentanoate+H2O'	'L-Cystathionine+H++Succinate'	'1D-myo-inositol 1-phosphate [cytoplasm]'
'3-hydroxydodecanoyl-CoA+NAD(+)'	'Glutamate'	'Diphosphate+UDP-glucose'	'ATP+UMP'	'g3p[c]+nad[c]+pi[c]'	'M_H2O_H2O+M_Diphosphate_HO7P2'	'Malonyl-[acyl-carrier protein]+Hexanoyl-[acp]'	'3-Dehydroquinate'	'D-Glucosamine 6-phosphate+L-Glutamate+H+'	'H++Pyruvate'	'H++S-Adenosyl-L-methionine'	'1D-myo-inositol 1-phosphate [cytoplasm]+H2O [cytoplasm]'
'3-oxododecanoyl-CoA+NADH'	'H2O, water+CO2, carbon dioxide'	'Prephenate'	'ADP+UDP'	'13dpg[c]+h[c]+nadh[c]'	'M_Methanethiol_CH4S'	'CO2+Acyl-carrier protein+3-Oxooctanoyl-[acp]'	'3-Dehydroshikimate+H2O'	'zeta-Carotene'	'(S)-2-Acetolactate+CO2'	'CO2 CO2+S-Adenosylmethioninamine'	'myo-inositol [cytoplasm]+phosphate [cytoplasm]'
