# Supplementary material for: Imposing multireaction dependencies provides an innovative strategy to alter metabolic functions
Source: Research Square preprint supplement (doi:10.21203/rs.3.rs-6304455/v1), 2025-04-15
Supplement: Supplementary file 4 [file 83bfab9c408c09e321fc1069.xlsx]

## Sheet: Sheet1
Supplementary Table S3. Complexes whose balancing is lethal in the model of cancer tissue, but allows at least 90% of optimal growth in the respective healthy tissue model.
Compartment abreviations: Cytoplasm - [c], Extracellular - [e], Golgi - [g], Lysosome - [l], Mitochondria - [m], Nucleus - [n], Endoplasmic reticulum - [r], Peroxisome - [x]
breast	gastric	kidney (RCC)	blood	liver (HCC)	lung (SCC)	lung (AC)	ovarian	pancreas
' 1*Asn_X_Ser_Thr[r]+0.1*g3m8mpdol_L[r]'	'1*13dampp[c]+1*h2o2[c]+1*4abutn[c]'	' 1*memgacpail_hs[r]+0.1*dolp_L[r]+ 1*h[r]'	' 20.6508*h2o[c]+ 20.7045*atp[c]+0.385872*glu_L[c]+0.352607*asp_L[c]+0.036117*gtp[c]+0.279425*asn_L[c]+0.505626*ala_L[c]+0.046571*cys_L[c]+0.325996*gln_L[c]+0.538891*gly[c]+0.392525*ser_L[c]+ 0.31269*thr_L[c]+0.592114*lys_L[c]+ 0.35926*arg_L[c]+0.153018*met_L[c]+0.023315*pail_hs[c]+0.039036*ctp[c]+0.154463*pchol_hs[c]+0.055374*pe_hs[c]+0.020401*chsterol[c]+0.002914*pglyc_hs[c]+0.011658*clpn_hs[c]…	'0.5*o2[x]+ 1*dhcholoylcoa[x]+ 1*fadh2[x]'	1*Asn_X_Ser_Thr[r]+0.1*g3m8mpdol_U[r]'	'1*13_cis_oretn[n]'	' 20.6508*h2o[c]+ 20.7045*atp[c]+0.385872*glu_L[c]+0.352607*asp_L[c]+0.036117*gtp[c]+0.279425*asn_L[c]+0.505626*ala_L[c]+0.046571*cys_L[c]+0.325996*gln_L[c]+0.538891*gly[c]+0.392525*ser_L[c]+ 0.31269*thr_L[c]+0.592114*lys_L[c]+ 0.35926*arg_L[c]+0.153018*met_L[c]+0.023315*pail_hs[c]+0.039036*ctp[c]+0.154463*pchol_hs[c]+0.055374*pe_hs[c]+0.020401*chsterol[c]+0.002914*pglyc_hs[c]+0.011658*clpn_hs[c]…	' 1*pi[c]+1.5*na1[c]'
' 1*gdpmann[c]+0.1*m1mpdol_L[c]'	'1*2425dhvitd3[c]'	'0.1*dolmanp_L[r]+ 1*emgacpail_hs[r]'	'1*10fthf[c]+1*h[c]'	'1*10fthf[c]+1*gar[c]'	' 1*gdpmann[c]+0.1*chito2pdol_U[c]'	'1*13_cis_retn[n]'	'1*13_cis_retn[r]'	' 20.6508*h2o[c]+ 20.7045*atp[c]+0.385872*glu_L[c]+0.352607*asp_L[c]+0.036117*gtp[c]+0.279425*asn_L[c]+0.505626*ala_L[c]+0.046571*cys_L[c]+0.325996*gln_L[c]+0.538891*gly[c]+0.392525*ser_L[c]+ 0.31269*thr_L[c]+0.592114*lys_L[c]+ 0.35926*arg_L[c]+0.153018*met_L[c]+0.023315*pail_hs[c]+0.039036*ctp[c]+0.154463*pchol_hs[c]+0.055374*pe_hs[c]+0.020401*chsterol[c]+0.002914*pglyc_hs[c]+0.011658*clpn_hs[c]…
' 1*gdpmann[c]+0.1*m2mpdol_L[c]'	'1*2dr5p[c]'	'0.1*dolmanp_L[r]+ 1*mgacpail_hs[r]'	'1*2dr1p[c]+1*gua[c]'	'1*13_cis_oretn[n]'	' 1*gdpmann[c]+0.1*m1mpdol_U[c]'	'1*2425dhvitd3[e]'	'1*2425dhvitd3[c]'	'1*10fthf[c]+1*aicar[c]'
' 1*gdpmann[c]+0.1*m3mpdol_L[c]'	'1*2mb2coa[m]+1*q10h2[m]'	'0.1*dolp_L[r]+ 1*h[r]+ 1*m2gacpail_hs[r]'	'1*7dhchsterol[r]'	'1*13_cis_retn[n]'	' 1*gdpmann[c]+0.1*m2mpdol_U[c]'	'1*25hvitd2[c]'	'1*2425dhvitd3[e]'	'1*1mncam[c]+1*ahcys[c]'
' 1*gdpmann[c]+0.1*mpdol_L[c]'	'1*2mbcoa[m]+1*q10[m]'	'1*10fthf6glu[l]'	'1*Rtotal2[c]'	'1*13_cis_retn[r]+1*udpglcur[r]'	' 1*gdpmann[c]+0.1*m3mpdol_U[c]'	'1*25hvitd2[e]'	'1*25aics[c]'	'1*1mncam[e]'
' 1*h2o[r]+0.1*doldp_L[r]'	'1*34hpp[e]'	'1*13dampp[c]+1*h2o[c]+1*o2[c]'	'1*accoa[m]+1*acac[m]'	'1*13_cis_retnglc[e]'	' 1*gdpmann[c]+0.1*mpdol_U[c]'	'1*25hvitd2[m]'	'1*25hvitd2[c]'	'1*1mncam[e]+1*adp[c]+1*h[c]+1*pi[c]'
' 1*h[c]+ 1*gdp[c]+0.1*m1mpdol_L[c]'	'1*35cgmp[c]+1*ppi[c]'	'1*2ddecdicoa[m]'	'1*ade[c]+1*r1p[c]'	'1*13_cis_retnglc[r]'	' 1*h2o[r]+0.1*doldp_U[r]'	'1*25hvitd3[e]'	'1*25hvitd2[e]'	'1*2hb[c]+1*nad[c]'
' 1*h[c]+ 1*gdp[c]+0.1*m2mpdol_L[c]'	'1*5mthf[c]+1*hcys_L[c]'	'1*3aib_D[e]'	'1*adp[c]+1*13dpg[c]'	'1*13dampp[c]+1*CE1944[c]'	' 1*h[c]+ 1*gdp[c]+0.1*m1mpdol_U[c]'	'1*25hvitd3[m]'	'1*25hvitd2[m]'	'1*2mop[m]+1*glu_L[m]'
' 1*h[c]+ 1*gdp[c]+0.1*m3mpdol_L[c]'	'1*5thf[e]'	'1*3ddecdicoa[m]'	'1*adp[c]+1*h[c]+1*pa_hs[c]'	'1*13dampp[c]+1*h2o2[c]+1*4abutn[c]'	' 1*h[c]+ 1*gdp[c]+0.1*m2mpdol_U[c]'	'1*2pg[c]'	'1*25hvitd3[c]'	'1*3mob[c]'
' 1*h[c]+ 1*gdp[c]+0.1*m4mpdol_L[c]'	'1*6thf[e]'	'1*4abut[c]'	'1*adp[c]+1*h[c]+1*pi[c]+1*ps_hs[m]'	'1*13dpg[c]'	' 1*h[c]+ 1*gdp[c]+0.1*m3mpdol_U[c]'	'1*5HPET[c]'	'1*25hvitd3[e]'	'1*3pg[c]'
' 1*h[c]+ 1*gdp[c]+0.1*mpdol_L[c]'	'1*7dhchsterol[c]'	'1*4abut[n]'	'1*amp[c]+1*ppi[c]+1*Rtotalcoa[c]'	'1*1mncam[c]+1*ahcys[c]'	' 1*h[c]+ 1*gdp[c]+0.1*m4mpdol_U[c]'	'1*6dhf[e]'	'1*25hvitd3[m]'	'1*4abut[n]'
' 1*h[c]+ 1*udp[c]+0.1*chito2pdol_L[c]'	'1*HC00250[c]'	'1*5thf[c]'	'1*arachcoa[c]'	'1*1mncam[e]'	' 1*h[c]+ 1*gdp[c]+0.1*mpdol_U[c]'	'1*7dhf[e]'	'1*2mop[m]+1*glu_L[m]'	'1*4mop[c]'
' 1*h[r]+0.1*doldp_L[r]+ 1*g3m8masn[r]'	'1*HC01397[m]'	'1*6dhf[c]'	'1*arachcoa[x]'	'1*1mncam[e]+1*adp[c]+1*h[c]+1*pi[c]'	' 1*h[c]+ 1*udp[c]+0.1*chito2pdol_U[c]'	'1*7thf[e]'	'1*3aib[c]'	'1*5dhf[e]'
' 1*uacgam[c]+0.1*naglc2p_L[c]'	'1*aacoa[x]+1*coa[x]'	'1*6thf[c]'	'1*asp_L[c]+1*cbp[c]'	'1*2425dhvitd3[e]'	' 1*h[r]+ 1*g3m8masn[r]+0.1*doldp_U[r]'	'1*C05957[r]'	'1*3aib[e]'	'1*5mthf[e]'
'0.1*chito2pdol_L[c]+ 1*gdpmann[c]'	'1*acac[c]'	'1*7dhchsterol[r]+2*h2o[r]+1*nadp[r]'	'1*atp[c]+1*3pg[c]'	'1*25hvitd2[c]'	' 1*h[r]+0.1*dolp_U[r]+ 1*mgacpail_hs[r]'	'1*CE1617[r]'	'1*3aib_D[e]'	'1*7dhchsterol[r]'
'0.1*dolglcp_L[r]+0.1*g1m8mpdol_L[r]'	'1*acac[x]'	'1*HC01403[x]'	'1*atp[c]+1*coa[c]+1*Rtotal[c]'	'1*25hvitd2[e]'	' 1*h[r]+0.1*dolp_U[r]+ 1*pi[r]'	'1*CE2705[c]'	'1*3mob[c]'	'1*7dhchsterol[r]+1*h[r]+1*nadph[r]'
'0.1*dolglcp_L[r]+0.1*g2m8mpdol_L[r]'	'1*accoa[m]+1*acac[m]'	'1*Rtotal2[c]'	'1*atp[c]+1*dag_hs[c]'	'1*25hvitd2[m]'	' 1*h[r]+0.1*dolp_U[r]+0.1*g1m8mpdol_U[r]'	'1*CE4876[r]'	'1*3mob[e]'	'1*C05279[m]'
'0.1*dolglcp_L[r]+0.1*m8mpdol_L[r]'	'1*accoa[m]+1*tdcoa[m]'	'1*Rtotal[l]+1*sphings[l]'	'1*cdpdag_hs[c]+1*inost[c]'	'1*25hvitd3[e]'	' 1*h[r]+0.1*dolp_U[r]+0.1*g2m8mpdol_U[r]'	'1*CE5236[c]'	'1*4abut[e]'	'1*C05280[m]'
'0.1*dolmanp_L[r]+ 1*m2emgacpail_hs[r]'	'1*accoa[x]+1*aacoa[x]+1*h2o[x]'	'1*Ser_Thr[g]'	'1*cdpdag_hs[c]+1*pglyc_hs[c]'	'1*2ddecdicoa[m]'	' 1*h[r]+0.1*dolp_U[r]+0.1*g3m8mpdol_U[r]'	'1*HC00250[e]'	'1*4abut[n]'	'1*CE5119[m]'
'0.1*dolmanp_L[r]+0.1*m4mpdol_L[r]'	'1*accoa[x]+1*acac[x]'	'1*T_antigen[g]'	'1*chsterol[c]'	'1*2dr1p[c]'	' 1*h[r]+0.1*dolp_U[r]+0.1*m5mpdol_U[r]'	'1*HC00342[c]+1*oxa[m]'	'1*4mop[e]'	'1*CE5120[m]'
'0.1*dolmanp_L[r]+0.1*m5mpdol_L[r]'	'1*acetone[e]'	'1*accoa[x]+1*occoa[x]'	'1*chsterol[e]+1*pchol_hs[e]'	'1*2hb[c]+1*ac[e]'	' 1*h[r]+0.1*dolp_U[r]+0.1*m6mpdol_U[r]'	'1*HC02100[l]'	'1*5HPET[c]'	'1*HC01223[m]'
'0.1*dolmanp_L[r]+0.1*m6mpdol_L[r]'	'1*acrn[c]+1*crn[x]'	'1*acgam[l]+1*ksi_deg17[l]'	'1*co2[c]+1*3dsphgn[c]+1*coa[c]'	'1*2hb[c]+1*akg[e]'	' 1*h[r]+0.1*dolp_U[r]+0.1*m7mpdol_U[r]'	'1*HC02121[c]'	'1*5mthf[e]'	'1*Rtotal2[c]'
'0.1*dolmanp_L[r]+0.1*m7mpdol_L[r]'	'1*adp[c]+1*atp[m]'	'1*acnam[n]'	'1*co2[e]'	'1*2hb[c]+1*ppa[e]'	' 1*h[r]+0.1*dolp_U[r]+0.1*m8mpdol_U[r]'	'1*HC02179[c]'	'1*7dhchsterol[c]'	'1*Rtotal2[e]'
'0.1*dolp_L[c]+ 1*uacgam[c]'	'1*adp[c]+1*atp[x]'	'1*acnam[n]+1*ctp[n]'	'1*co2[m]+1*pe_hs[m]'	'1*2hb[e]'	' 1*uacgam[c]+0.1*naglc2p_U[c]'	'1*HC02179[e]'	'1*C05957[r]'	'1*Rtotal2coa[c]+1*alpa_hs[c]'
'0.1*dolp_L[r]+ 1*h[r]+ 1*m3emgacpail_hs[r]'	'1*adp[c]+1*h[c]+1*g6p[c]'	'1*acrn[c]+1*crn[x]'	'1*cys_L[e]'	'1*2hb[e]+1*ac[c]'	' 1*ump[c]+0.1*naglc2p_U[c]'	'1*HC02202[c]'	'1*CE1617[r]'	'1*Rtotal[c]'
'0.1*dolp_L[r]+ 1*h[r]+ 1*pi[r]'	'1*adp[c]+1*h[c]+1*paps[c]'	'1*ade[e]'	'1*dag_hs[c]+1*sphmyln_hs[c]'	'1*2hb[e]+1*ppa[c]'	'0.1*dolglcp_U[r]+0.1*g1m8mpdol_U[r]'	'1*HC02202[e]'	'1*CE2705[c]'	'1*Rtotal[e]'
'0.1*dolp_L[r]+ 1*h[r]+0.1*g1m8mpdol_L[r]'	'1*adp[c]+1*h[c]+1*pi[c]+1*C02528[e]'	'1*adp[c]+1*dctp[m]'	'1*dctp[c]'	'1*2mb2coa[m]+1*q10h2[m]'	'0.1*dolglcp_U[r]+0.1*g2m8mpdol_U[r]'	'1*HC02203[c]'	'1*CE4876[r]'	'1*Rtotalcoa[c]+1*glyc3p[c]'
'0.1*dolp_L[r]+ 1*h[r]+0.1*g2m8mpdol_L[r]'	'1*adp[c]+1*h[c]+1*pi[c]+1*gln_L[c]'	'1*adp[c]+1*dgdp[m]'	'1*dgtp[n]'	'1*2mbcoa[m]+1*dhlam[m]'	'0.1*dolglcp_U[r]+0.1*m8mpdol_U[r]'	'1*HC02203[e]'	'1*CE5236[c]'	'1*aacoa[c]+1*amp[c]+1*ppi[c]'
'0.1*dolp_L[r]+ 1*h[r]+0.1*g3m8mpdol_L[r]'	'1*adp[c]+1*h[c]+1*pyam5p[c]'	'1*adp[c]+1*h[c]+1*f26bp[c]'	'1*dump[c]'	'1*2mbcoa[m]+1*q10[m]'	'0.1*dolichol_U[c]'	'1*HC02204[c]'	'1*HC02100[l]'	'1*acgam1p[c]'
'0.1*dolp_L[r]+ 1*h[r]+0.1*m5mpdol_L[r]'	'1*adp[m]+1*dttp[m]'	'1*adp[c]+1*h[c]+1*pi[c]+1*cholcoa[x]'	'1*f6p[c]+1*e4p[c]'	'1*2mcit[c]'	'0.1*dolichol_U[r]'	'1*HC02204[e]'	'1*HC02179[c]'	'1*acgam6p[c]'
'0.1*dolp_L[r]+ 1*h[r]+0.1*m6mpdol_L[r]'	'1*akg[c]+1*cit[m]'	'1*adp[c]+1*h[c]+1*pi[c]+1*dgchol[e]'	'1*g3p[c]'	'1*2mcit[e]'	'0.1*dolmanp_U[r]+ 1*gacpail_hs[r]'	'1*HC02205[c]'	'1*HC02179[e]'	'1*ade[c]+1*prpp[c]'
'0.1*dolp_L[r]+ 1*h[r]+0.1*m7mpdol_L[r]'	'1*akg[c]+1*cys_L[c]'	'1*adp[c]+1*h[c]+1*pi[c]+1*dlnlcg[e]'	'1*g3p[c]+1*f6p[c]'	'1*2mop[m]+1*ala_L[m]'	'0.1*dolmanp_U[r]+0.1*m4mpdol_U[r]'	'1*HC02205[e]'	'1*HC02180[c]'	'1*ade[c]+1*r1p[c]'
'0.1*dolp_L[r]+ 1*h[r]+0.1*m8mpdol_L[r]'	'1*akg[c]+1*succ[m]'	'1*adp[c]+1*h[c]+1*pi[c]+1*elaid[e]'	'1*glyc3p[c]'	'1*2mop[m]+1*glu_L[m]'	'0.1*dolmanp_U[r]+0.1*m5mpdol_U[r]'	'1*HC02206[c]'	'1*HC02180[e]'	'1*adn[c]+1*dgtp[c]'
'0.1*naglc2p_L[c]+ 1*ump[c]'	'1*akg[m]+1*cit[c]'	'1*adp[c]+1*h[c]+1*pi[c]+1*glu_L[c]+1*fpram[c]'	'1*glyc3p[x]'	'1*2pg[c]'	'0.1*dolmanp_U[r]+0.1*m6mpdol_U[r]'	'1*HC02206[e]'	'1*HC02187[c]'	'1*adp[c]+1*h[c]+1*cholp[c]'
'1*10fthf5glu[c]'	'1*akg[m]+1*coa[m]+1*nad[m]'	'1*adp[c]+1*h[c]+1*pi[c]+1*hdcea[e]'	'1*gtp[c]+1*trdrd[c]'	'1*34hpp[c]'	'0.1*dolmanp_U[r]+0.1*m7mpdol_U[r]'	'1*HC02207[c]'	'1*HC02187[e]'	'1*adp[c]+1*h[c]+1*dgmp[c]'
'1*10fthf5glu[l]+4*h2o[l]'	'1*akg[m]+1*nh4[m]'	'1*adp[c]+1*h[c]+1*pi[c]+1*lnlnca[e]'	'1*h2o[c]+1*atp[c]+1*ps_hs[c]'	'1*34hpp[e]'	'0.1*dolp_U[c]+ 1*uacgam[c]'	'1*HC02207[e]'	'1*HC02202[c]'	'1*adp[c]+1*h[c]+1*pail35p_hs[c]'
'1*10fthf[c]+1*gar[c]'	'1*akg[m]+1*succ[c]'	'1*adp[c]+1*udp[c]'	'1*h2o[c]+1*dgmp[c]'	'1*3ddecdicoa[m]'	'1*10fthf5glu[m]+1*h[m]+3*h2o[m]+1*adp[m]+1*pi[m]'	'1*HC02208[c]'	'1*HC02202[e]'	'1*adp[c]+1*h[c]+1*pan4p[c]'
'1*10fthf[l]+4*glu_L[l]'	'1*ala_L[c]+1*5oxpro[c]'	'1*adp[c]+2*h[c]+1*pi[c]+1*air[c]'	'1*h2o[c]+1*dgtp[c]+1*trdox[c]'	'1*3mlda[e]'	'1*10fthf6glu[l]+1*glu_L[l]'	'1*HC02208[e]'	'1*HC02203[c]'	'1*adp[c]+1*h[c]+1*pi[c]+1*gar[c]'
'1*25aics[c]'	'1*ala_L[m]+1*HC00591[m]'	'1*adp[m]+1*datp[m]'	'1*h2o[c]+1*dhor_S[c]'	'1*3pg[c]'	'1*10fthf6glu[m]'	'1*HC02210[c]'	'1*HC02203[e]'	'1*adp[c]+1*h[c]+1*pi[c]+1*pe_hs[c]'
'1*34hpp[e]'	'1*ametam[c]+1*spmd[c]'	'1*adp[m]+1*dctp[c]'	'1*h2o[c]+1*g3pc[c]'	'1*4abut[c]'	'1*10fthf7glu[l]'	'1*HC02210[e]'	'1*HC02204[c]'	'1*adp[c]+1*h[c]+1*pi[c]+1*phyQ[c]'
'1*4abut[e]'	'1*amp[c]+1*ppi[c]+1*arachcoa[c]'	'1*adp[m]+1*dgdp[c]'	'1*h2o[c]+1*lpchol_hs[c]'	'1*4hglusa[m]'	'1*10fthf7glu[l]+1*h2o[l]'	'1*HC02213[c]'	'1*HC02204[e]'	'1*adp[c]+1*h[c]+1*pi[c]+1*ps_hs[m]'
'1*5thf[m]'	'1*amp[c]+1*ppi[c]+1*pmtcoa[c]'	'1*adp[m]+1*pi[m]+1*succoa[m]'	'1*h2o[c]+1*methf[c]'	'1*5HPET[r]'	'1*10fthf[c]+1*gar[c]'	'1*HC02213[e]'	'1*HC02205[c]'	'1*adp[c]+1*h[c]+1*pi[c]+1*ribflv[c]'
'1*CE5117[m]'	'1*arachd[r]'	'1*adp[r]+1*h[r]+1*pi[r]+1*chsterol[e]'	'1*h2o[c]+1*ps_hs[c]'	'1*5dhf[e]'	'1*10fthf[m]+4*glu_L[m]+1*atp[m]'	'1*HC02214[c]'	'1*HC02205[e]'	'1*adp[c]+1*h[c]+1*pi[c]+1*strdnc[e]'
'1*HC01444[e]'	'1*asn_L[c]'	'1*akg[c]+1*cit[m]'	'1*h2o[e]+1*co2[e]'	'1*5fthf[c]+1*h2o[e]'	'1*2dr1p[c]+1*gua[c]'	'1*HC02214[e]'	'1*HC02206[c]'	'1*adp[c]+1*h[c]+1*pi[c]+1*tchola[e]'
'1*Lcystin[c]'	'1*asn_L[c]+1*met_L[e]'	'1*akg[m]+1*cit[c]'	'1*h2o[m]+1*accoa[m]+1*oaa[m]'	'1*6thf[e]'	'1*34dhphe[c]+1*leu_L[e]'	'1*HC02216[c]'	'1*HC02206[e]'	'1*adp[c]+1*h[c]+1*pyam5p[c]'
'1*acac[c]+1*pyr[e]'	'1*asn_L[c]+1*phe_L[e]'	'1*akg[m]+1*orn[m]'	'1*h[c]+1*Rtotal[c]+1*g3pc[c]'	'1*C05957[r]'	'1*34dhphe[e]+1*leu_L[c]'	'1*HC02216[e]'	'1*HC02207[c]'	'1*adp[c]+1*utp[c]'
'1*acgam[l]+1*ksi_deg32[l]'	'1*asn_L[e]+1*met_L[c]'	'1*ala_L[m]'	'1*h[c]+1*cbasp[c]'	'1*CE2056[r]'	'1*34hpp[c]'	'1*HC02217[c]'	'1*HC02207[e]'	'1*adp[c]+2*h[c]+1*pi[c]+1*air[c]'
'1*adp[c]+1*dutp[m]'	'1*asn_L[e]+1*phe_L[c]'	'1*arachd[c]+1*crn[r]'	'1*h[c]+1*chol[c]+1*glyc3p[c]'	'1*CE2432[m]'	'1*34hpp[c]+1*glu_L[c]'	'1*HC02217[e]'	'1*HC02208[c]'	'1*adp[n]+1*ditp[n]'
'1*adp[c]+1*h[c]+1*dtmp[c]'	'1*atp[c]+1*adp[m]'	'1*arg_L[c]+1*val_L[e]'	'1*h[c]+1*cmp[c]+1*clpn_hs[c]'	'1*CE2705[c]'	'1*3aib_D[e]'	'1*ac[c]+1*CE2089[c]'	'1*HC02208[e]'	'1*aicar[c]'
'1*adp[c]+1*h[c]+1*pi[c]+1*25aics[c]'	'1*atp[c]+1*adp[x]'	'1*arg_L[e]+1*val_L[c]'	'1*h[c]+1*cmp[c]+1*pail_hs[c]'	'1*CE2705[n]'	'1*3mob[e]'	'1*ac[m]+1*oaa[m]'	'1*HC02210[c]'	'1*aicar[e]'
'1*adp[c]+1*h[c]+1*pi[c]+1*dgchol[e]'	'1*atp[c]+1*aps[c]'	'1*ascb_L[c]'	'1*h[c]+1*coa[c]+1*dhcrm_hs[c]'	'1*CE4876[r]'	'1*4abutn[e]'	'1*acgam[c]'	'1*HC02210[e]'	'1*akg[c]+1*pi[m]'
'1*adp[c]+1*h[c]+1*pi[c]+2*na1[c]+1*btn[c]'	'1*atp[c]+1*coa[c]+1*hdca[c]'	'1*ascb_L[e]'	'1*h[c]+1*nadph[c]+1*3dsphgn[c]'	'1*CE5117[m]'	'1*5dhf[l]+1*glu_L[l]'	'1*acgam[l]'	'1*HC02213[c]'	'1*akg[m]+1*3aib_D[m]'
'1*adp[c]+2*h[c]+1*pi[c]+1*air[c]'	'1*atp[c]+1*coa[c]+1*hdcea[c]'	'1*asn_L[c]+1*thr_L[e]'	'1*h[c]+1*nadph[c]+1*dhf[c]'	'1*CE5118[m]'	'1*6dhf[l]+1*glu_L[l]'	'1*ach[c]'	'1*HC02213[e]'	'1*akg[m]+1*orn[m]'
'1*adp[m]+1*dutp[c]'	'1*atp[c]+1*f6p[c]'	'1*asn_L[e]+1*thr_L[c]'	'1*h[c]+1*pa_hs[c]+1*ser_L[c]'	'1*CE5125[x]'	'1*7dhf[l]'	'1*ach[e]'	'1*HC02214[c]'	'1*ala_B[m]'
'1*akg[m]+1*ala_B[m]'	'1*atp[c]+1*glc_D[c]'	'1*asn_L[m]'	'1*h[c]+1*pi[c]+1*cbasp[c]'	'1*CE5126[x]'	'1*HC00229[e]'	'1*ade[e]+1*prpp[e]'	'1*HC02214[e]'	'1*ala_L[c]+1*hom_L[e]'
'1*akg[m]+1*ala_L[m]'	'1*atp[c]+1*h[c]+1*fmn[c]'	'1*asp_L[m]+1*nh4[m]'	'1*h[c]+1*ser_L[c]+1*pmtcoa[c]'	'1*CE5236[c]'	'1*HC01231[c]'	'1*adp[c]+1*gdp[c]'	'1*HC02216[c]'	'1*ala_L[c]+1*ile_L[e]'
'1*akg[m]+1*val_L[m]'	'1*atp[c]+1*pydam[c]'	'1*atp[c]+1*coa[c]+1*lnlc[c]'	'1*h[e]+1*hco3[e]'	'1*CE5236[n]'	'1*HC01231[m]'	'1*adp[c]+1*h[c]+1*CE5132[c]'	'1*HC02216[e]'	'1*ala_L[e]+1*hom_L[c]'
'1*ala_D[c]'	'1*atp[m]+1*adn[m]'	'1*atp[c]+1*fpram[c]'	'1*h[m]+1*coa[m]+1*cit[m]'	'1*CE5586[c]'	'1*HC01401[m]'	'1*adp[c]+1*h[c]+1*pa_hs[c]'	'1*HC02217[c]'	'1*ala_L[e]+1*ile_L[c]'
'1*amp[c]+1*fum[c]'	'1*atp[m]+1*dpcoa[m]'	'1*atp[c]+1*h[c]+1*nmn[c]'	'1*h[m]+1*h2o[m]+1*1pyr5c[m]'	'1*HC01397[x]'	'1*Rtotal2[e]'	'1*adp[c]+1*h[c]+1*pan4p[c]'	'1*HC02217[e]'	'1*ala_L[m]'
'1*amp[c]+1*ppi[c]+1*Rtotalcoa[c]'	'1*atp[m]+1*dtdp[m]'	'1*atp[c]+1*ump[c]'	'1*h[m]+1*ps_hs[m]'	'1*HC01407[m]'	'1*ac[c]+1*oaa[c]'	'1*adp[c]+1*h[c]+1*pi[c]+1*arachdcoa[x]'	'1*Rtotal2[c]'	'1*amet[c]+1*ncam[c]'
'1*amp[r]+1*ppi[r]+1*pmtcoa[r]'	'1*bilglcur[c]'	'1*atp[m]+1*cytd[m]'	'1*h[x]+1*nadh[x]+1*accoa[x]+1*pmtcoa[x]+1*h2o2[x]'	'1*HC01444[e]'	'1*acald[m]'	'1*adp[c]+1*h[c]+1*pi[c]+1*gthrd[m]'	'1*Rtotal2[e]'	'1*amp[c]+1*atp[r]'
'1*asp_L[c]+1*gtp[c]+1*imp[c]'	'1*bilglcur[e]'	'1*atp[m]+1*dadp[m]'	'1*h[x]+1*nadh[x]+1*dhap[x]'	'1*HC02100[l]'	'1*acgam[l]+1*glcur[l]'	'1*adp[m]+1*dutp[m]'	'1*Rtotal[e]'	'1*amp[c]+1*ppi[c]'
'1*atp[c]+1*asp_L[c]+1*5aizc[c]'	'1*btn[c]'	'1*atp[m]+1*duri[m]'	'1*hmgcoa[x]'	'1*HC02121[c]'	'1*acgam[l]+1*ha_pre1[l]'	'1*ahcys[c]'	'1*ac[m]+1*oaa[m]'	'1*amp[c]+1*ppi[c]+1*Rtotal2coa[c]'
'1*atp[c]+1*fpram[c]'	'1*c4crn[c]'	'1*atp[m]+1*glyc[m]'	'1*inost[e]'	'1*HC02175[c]'	'1*acrn[m]'	'1*ahcys[e]'	'1*accoa[c]+1*crn[c]'	'1*arach[e]'
'1*atp[c]+1*thymd[c]'	'1*cdpchol[c]+1*dag_hs[c]'	'1*bamppald[c]+1*h2o2[c]+1*nh4[c]'	'1*lpchol_hs[e]+1*xolest2_hs[e]'	'1*HC02175[e]'	'1*adp[c]+1*dadp[c]'	'1*ak2lgchol_hs[c]'	'1*accoa[x]+1*crn[x]'	'1*arg_L[c]+1*trp_L[e]'
'1*atp[c]+1*trdrd[c]'	'1*cit[e]'	'1*bilirub[c]'	'1*met_L[e]'	'1*HC02176[e]'	'1*adp[c]+1*dutp[m]'	'1*ak2lgchol_hs[e]'	'1*ach[c]'	'1*arg_L[e]+1*trp_L[c]'
'1*atp[n]+1*dcdp[n]'	'1*cit[m]'	'1*bilirub[r]'	'1*na1[c]+1*inost[c]'	'1*Lcystin[c]'	'1*adp[c]+1*h[c]+1*4ppcys[c]'	'1*akg[m]+1*co2[m]'	'1*ach[e]'	'1*asn_L[c]+1*gln_L[e]'
'1*atp[r]+1*coa[r]+1*hdca[r]'	'1*cmp[c]+1*dctp[c]'	'1*cmpacna[c]'	'1*na1[e]+1*inost[e]'	'1*Lfmkynr[c]'	'1*adp[c]+1*h[c]+1*amp[c]'	'1*amp[e]+1*ppi[e]'	'1*acrn[c]+1*crn[x]'	'1*asn_L[c]+1*gly[e]'
'1*c10dc[c]'	'1*co2[c]+1*ametam[c]'	'1*cmpacna[n]'	'1*nad[c]+1*5mthf[c]'	'1*Rtotal2[e]'	'1*adp[c]+1*h[c]+1*crmp_hs[c]'	'1*arach[e]'	'1*adp[c]+1*dcdp[c]'	'1*asn_L[c]+1*phe_L[e]'
'1*c10dc[x]'	'1*co2[m]+1*acetone[m]'	'1*cmpacna[n]+1*ppi[n]'	'1*nad[c]+1*dhf[c]'	'1*Rtotal2coa[c]+1*alpa_hs[c]'	'1*adp[c]+1*h[c]+1*gal1p[c]'	'1*arachd[c]'	'1*adp[c]+1*ditp[c]'	'1*asn_L[e]+1*gln_L[c]'
'1*cdp[n]+1*dadp[n]'	'1*co2[m]+1*nadh[m]+1*pyr[m]'	'1*co2[c]+1*xylu_L[c]'	'1*nad[x]+1*coa[x]+1*o2[x]+1*h2o[x]+1*stcoa[x]'	'1*Rtotal[e]'	'1*adp[c]+1*h[c]+1*pa_hs[c]'	'1*arachd[c]+1*crn[r]'	'1*adp[c]+1*dttp[c]'	'1*asn_L[e]+1*gly[c]'
'1*citr_L[c]+1*trp_L[e]'	'1*co2[m]+1*nadh[m]+1*succoa[m]'	'1*coa[c]+1*ocdececrn[c]'	'1*nad[x]+1*glyc3p[x]'	'1*Rtotalcoa[c]+1*glyc3p[c]'	'1*adp[c]+1*h[c]+1*pi[c]+1*bildglcur[e]'	'1*arachd[l]'	'1*adp[c]+1*h[c]+1*CE5132[c]'	'1*asn_L[e]+1*phe_L[c]'
'1*citr_L[c]+1*tyr_L[e]'	'1*coa[c]+1*c4crn[c]'	'1*coa[m]+1*atp[m]+1*succ[m]'	'1*nadh[c]+1*fol[c]'	'1*ac[c]+1*CE2089[c]'	'1*adp[c]+1*h[c]+1*pi[c]+1*camp[e]'	'1*ascb_L[c]'	'1*adp[c]+1*h[c]+1*cholp[c]'	'1*atp[c]+1*amp[r]'
'1*cmp[n]+1*datp[n]'	'1*coa[c]+1*elaidcrn[c]'	'1*coa[x]+1*3odcoa[x]'	'1*nadp[c]+1*sphgn[c]'	'1*ac[c]+1*akg[e]'	'1*adp[c]+1*h[c]+1*pi[c]+1*gar[c]'	'1*ascb_L[e]'	'1*adp[c]+1*h[c]+1*dump[c]'	'1*atp[c]+1*chol[c]'
'1*co2[c]+1*ptth[c]'	'1*coa[c]+1*hdcecrn[c]'	'1*coa[x]+1*c4dc[x]'	'1*nadp[c]+1*thf[c]'	'1*ac[c]+1*pyr[e]'	'1*adp[c]+1*h[c]+1*pi[c]+1*gthrd[e]'	'1*asn_L[c]+1*gln_L[e]'	'1*adp[c]+1*itp[c]'	'1*atp[c]+1*coa[c]+1*Rtotal2[c]'
'1*coa[c]+1*c12dc[c]'	'1*coa[c]+1*odecrn[c]'	'1*crm_hs[l]+1*gal[l]'	'1*pchol_hs[c]+1*crm_hs[c]'	'1*ac[e]'	'1*adp[c]+1*h[c]+1*pi[c]+1*gthrd[m]'	'1*asn_L[c]+1*met_L[e]'	'1*adp[c]+1*trdrd[c]'	'1*atp[c]+1*coa[c]+1*acac[c]'
'1*coa[c]+1*c6crn[c]'	'1*coa[m]+1*3ohdcoa[m]'	'1*crn[c]+1*acrn[x]'	'1*pe_hs[c]'	'1*acac[c]+1*bhb[e]'	'1*adp[c]+1*h[c]+1*pi[c]+1*lgnc[e]'	'1*asn_L[c]+1*phe_L[e]'	'1*adp[m]+1*dtdp[m]'	'1*atp[c]+1*coa[c]+1*arach[e]'
'1*core8[g]'	'1*coa[m]+1*HC01007[m]'	'1*crn[c]+1*arachd[r]'	'1*ppi[c]+1*orot5p[c]'	'1*acac[c]+1*but[e]'	'1*adp[c]+1*h[c]+1*pi[c]+1*lnlc[e]'	'1*asn_L[e]+1*gln_L[c]'	'1*adp[n]+1*gtp[n]'	'1*atp[c]+1*dgsn[c]'
'1*crn[c]+1*c12dccoa[c]'	'1*coa[m]+1*elaidcrn[m]'	'1*crn[c]+1*lnlncg[r]'	'1*prpp[c]+1*orot[c]'	'1*acac[c]+1*lac_L[e]'	'1*adp[c]+1*h[c]+1*pi[c]+1*phyQ[c]'	'1*asn_L[e]+1*met_L[c]'	'1*adp[n]+1*itp[n]'	'1*atp[c]+1*f6p[c]'
'1*crn[c]+1*hxcoa[c]'	'1*coa[m]+1*hdcecrn[m]'	'1*crn[c]+1*octd11ecoa[c]'	'1*q10[m]+1*dhor_S[c]'	'1*acac[e]+1*bhb[c]'	'1*adp[c]+1*h[c]+1*pi[c]+1*ps_hs[c]'	'1*asn_L[e]+1*phe_L[c]'	'1*ahcys[c]'	'1*atp[c]+1*fpram[c]'
'1*crn[e]'	'1*coa[m]+1*odecrn[m]'	'1*crn[c]+1*pmtcrn[r]'	'1*q10h2[m]+1*orot[c]'	'1*acac[e]+1*but[c]'	'1*adp[c]+2*h[c]+1*pi[c]+1*glu_L[c]+1*ctp[c]'	'1*asp_L[c]'	'1*ahcys[e]'	'1*atp[c]+1*gly[c]+1*pram[c]'
'1*ctp[c]+1*trdrd[c]'	'1*coa[m]+1*pmtcrn[m]'	'1*crn[r]+1*lnlncg[c]'	'1*r5p[c]+1*xu5p_D[c]'	'1*acac[e]+1*lac_L[c]'	'1*adp[m]+1*cdp[m]'	'1*asp_L[e]'	'1*aicar[c]'	'1*atp[c]+1*ptth[c]'
'1*dadp[m]+1*dgdp[m]'	'1*coa[x]+1*HC01007[x]'	'1*crn[x]+1*succoa[x]'	'1*ru5p_D[c]'	'1*accoa[c]+1*CE2089[c]'	'1*adp[m]+1*ctp[m]'	'1*atp[c]+1*dag_hs[c]'	'1*akg[c]+1*HC00342[m]'	'1*atp[c]+1*pydam[c]'
'1*datp[m]+1*dgmp[m]'	'1*crn[c]+1*HC01007[m]'	'1*cys_L[c]+1*thr_L[e]'	'1*sphgn[c]+1*Rtotalcoa[c]'	'1*accoa[m]+1*CE2431[m]'	'1*adp[m]+1*dctp[m]'	'1*atp[c]+1*gmp[c]'	'1*akg[c]+1*cit[m]'	'1*atp[c]+1*r5p[c]'
'1*dcamp[c]'	'1*crn[c]+1*HC01007[x]'	'1*cys_L[e]+1*thr_L[c]'	'1*trp_L[e]'	'1*accoa[m]+1*CE4794[m]'	'1*adp[m]+1*dutp[c]'	'1*atp[c]+1*pail3p_hs[c]'	'1*akg[c]+1*icit[m]'	'1*atp[c]+1*udp[c]'
'1*dctp[n]+1*adp[n]'	'1*crn[c]+1*acrn[x]'	'1*dadp[c]+1*cdp[c]'	'1*tyr_L[e]'	'1*accoa[m]+1*btcoa[m]'	'1*adp[m]+1*pi[m]+1*methf[m]'	'1*atp[c]+1*ptth[c]'	'1*akg[c]+1*val_L[c]'	'1*atp[m]+1*dpcoa[m]'
'1*dmpp[c]'	'1*crn[c]+1*btcoa[c]'	'1*dadp[c]+1*dtdp[m]'	'1*xu5p_D[c]+1*e4p[c]'	'1*accoa[m]+1*dhlam[m]'	'1*adp[m]+1*udp[m]'	'1*atp[m]+1*dudp[m]'	'1*akg[m]+1*HC00342[c]'	'1*atp[n]+1*dgdp[n]'
'1*drib[e]'	'1*crn[c]+1*hdcoa[c]'	'1*dadp[c]+1*dttp[c]'	'2*h[c]+1*nadh[c]+1*mlthf[c]'	'1*accoa[m]+1*gly[m]'	'1*ahcys[m]'	'1*atp[n]+1*pail3p_hs[n]'	'1*akg[m]+1*cit[c]'	'1*atp[n]+1*didp[n]'
'1*dtdp[c]+1*dudp[m]'	'1*crn[c]+1*od2coa[c]'	'1*dadp[m]+1*dtdp[c]'	'20.6508*adp[c]+20.6508*h[c]+20.6508*pi[c]'	'1*accoa[x]+1*acac[x]'	'1*akg[c]+1*HC00342[m]'	'1*atp[x]'	'1*akg[m]+1*co2[m]'	'1*atp[n]+1*pail5p_hs[n]'
'1*dtdp[m]+1*dudp[c]'	'1*crn[c]+1*odecoa[c]'	'1*datp[c]+1*cmp[c]'		'1*accoa[x]+1*crn[x]'	'1*akg[c]+1*co2[c]'	'1*avite1[e]'	'1*akg[m]+1*icit[c]'	'1*atp[n]+1*udp[n]'
'1*f1a[g]'	'1*crn[m]+1*HC01007[c]'	'1*datp[c]+1*dtdp[c]'		'1*accoa[x]+1*tdcoa[x]'	'1*akg[c]+1*tyr_L[c]'	'1*avite2[c]'	'1*ala_L[c]+1*hom_L[e]'	'1*bilglcur[e]'
'1*f1a[l]'	'1*crn[m]+1*hdcoa[m]'	'1*datp[n]'		'1*acgam[c]'	'1*akg[m]+1*4abut[m]'	'1*avite2[e]'	'1*ala_L[c]+1*pro_L[e]'	'1*btn[e]'
'1*fad[r]'	'1*crn[m]+1*occoa[m]'	'1*dcacoa[x]+1*o2[x]'		'1*acgam[l]'	'1*akg[m]+1*HC00342[c]'	'1*bilglcur[c]'	'1*ala_L[c]+1*ser_L[e]'	'1*cdpchol[c]+1*dag_hs[c]'
'1*fadh2[c]'	'1*crn[m]+1*od2coa[m]'	'1*dcholcoa[c]'		'1*acrn[c]+1*crn[x]'	'1*akg[m]+1*leu_L[m]'	'1*bilglcur[e]'	'1*ala_L[c]+1*thr_L[e]'	'1*cdpdag_hs[c]+1*glyc3p[c]'
'1*fadh2[r]'	'1*crn[m]+1*odecoa[m]'	'1*dcholcoa[r]'		'1*acrn[x]'	'1*ala_L[c]+1*5oxpro[c]'	'1*bvite[c]'	'1*ala_L[e]+1*hom_L[c]'	'1*cdpdag_hs[c]+1*inost[c]'
'1*fmn[e]'	'1*crn[m]+1*pmtcoa[m]'	'1*dctp[c]+1*dgdp[m]'		'1*adp[c]'	'1*ala_L[c]+1*trp_L[e]'	'1*bvite[e]'	'1*ala_L[e]+1*pro_L[c]'	'1*cdpdag_hs[c]+1*pglyc_hs[c]'
'1*fum[c]+1*aicar[c]'	'1*crn[x]+1*HC01007[c]'	'1*dece3coa[m]'		'1*adp[c]+1*13dpg[c]'	'1*ala_L[e]+1*trp_L[c]'	'1*cbasp[c]'	'1*ala_L[e]+1*ser_L[c]'	'1*chol[c]+1*ps_hs[c]'
'1*gln_L[c]+1*his_L[e]'	'1*ctp[c]+1*dcmp[c]'	'1*dgdp[c]+1*dctp[m]'		'1*adp[c]+1*cdp[c]'	'1*ala_L[m]'	'1*cbasp[e]'	'1*ala_L[e]+1*thr_L[c]'	'1*chsterol[c]'
'1*gln_L[e]+1*his_L[c]'	'1*cys_L[e]'	'1*dgdp[c]+1*dutp[m]'		'1*adp[c]+1*dctp[c]'	'1*amet[m]'	'1*chol[e]'	'1*amet[c]'	'1*citr_L[c]+1*val_L[e]'
'1*glu_L[m]+1*3mob[m]'	'1*dadp[m]+1*dgdp[m]'	'1*dgdp[m]+1*dutp[c]'		'1*adp[c]+1*dttp[c]'	'1*amp[c]+1*ppi[c]+1*HC10852[c]'	'1*cholcoa[c]'	'1*amet[r]'	'1*citr_L[e]+1*val_L[c]'
'1*glu_L[m]+1*msa[m]'	'1*datp[c]+1*fru[c]'	'1*dgsn[e]'		'1*adp[c]+1*gdp[c]'	'1*amp[c]+1*ppi[c]+1*Rtotal2coa[c]'	'1*cholcoa[x]'	'1*amp[c]+1*ppi[c]+1*Rtotal2coa[c]'	'1*co2[c]+1*3dsphgn[c]+1*coa[c]'
'1*glu_L[m]+1*pyr[m]'	'1*datp[m]+1*dgmp[m]'	'1*dhf[c]'		'1*adp[c]+1*gtp[c]'	'1*amp[c]+1*ppi[c]+1*Rtotalcoa[c]'	'1*chsterol[l]'	'1*amp[c]+1*ppi[c]+1*Rtotalcoa[c]'	'1*co2[c]+1*ump[c]'
'1*gluside_hs[c]'	'1*dgmp[c]'	'1*dmnoncrn[x]'		'1*adp[c]+1*h[c]+1*CE5132[c]'	'1*amp[c]+1*ppi[c]+1*lneldccoa[c]'	'1*chsterol[m]'	'1*arach[c]'	'1*co2[m]+1*nadh[m]+1*2mbcoa[m]'
'1*gluside_hs[r]'	'1*dgmp[m]'	'1*f1a[g]'		'1*adp[c]+1*h[c]+1*acmanap[c]'	'1*amp[c]+1*ppi[c]+1*lnlccoa[c]'	'1*cit[c]+1*oxa[m]'	'1*arachcoa[c]'	'1*co2[m]+1*nadh[m]+1*nh4[m]+1*mlthf[m]'
'1*gmp[g]'	'1*dgtp[m]+1*duri[m]'	'1*f1a[l]'		'1*adp[c]+1*h[c]+1*f26bp[c]'	'1*amp[r]+1*ppi[r]+1*odecoa[r]'	'1*cit[m]'	'1*arachcoa[x]'	'1*co2[m]+1*pe_hs[m]'
'1*h2o2[c]+1*h[c]+1*HC00460[c]'	'1*elaidcrn[c]'	'1*fad[m]+1*dece4coa[m]'		'1*adp[c]+1*h[c]+1*pan4p[c]'	'1*amp[x]+1*ppi[x]+1*phytcoa[x]'	'1*cit[m]+1*oxa[c]'	'1*arachd[c]'	'1*coa[c]+1*alpa_hs[c]'
'1*h2o2[c]+1*xan[c]'	'1*elaidcrn[m]'	'1*fad[m]+1*etfrd[m]'		'1*adp[c]+1*h[c]+1*pdx5p[c]'	'1*arg_L[c]+1*hom_L[e]'	'1*co2[c]'	'1*arachdcoa[c]'	'1*coa[c]+1*pa_hs[c]'
'1*h2o2[m]+1*CE2435[m]'	'1*fad[m]+1*CE0785[m]'	'1*fad[x]'		'1*adp[c]+1*h[c]+1*pi[c]+1*HC02175[e]'	'1*arg_L[e]+1*hom_L[c]'	'1*co2[c]+1*xylu_L[c]'	'1*arachdcoa[x]'	'1*coa[m]+1*nad[m]+1*3mop[m]'
'1*h2o[c]+1*adprib[c]'	'1*fadh2[m]+1*CE2432[m]'	'1*fadh2[m]+1*dec24dicoa[m]'		'1*adp[c]+1*h[c]+1*pi[c]+1*HC02176[e]'	'1*asp_L[c]'	'1*co2[e]'	'1*arg_L[c]'	'1*coa[r]+1*pmtcrn[r]'
'1*h2o[c]+1*atp[c]+1*dgchol[c]'	'1*fe2[c]'	'1*fadh2[m]+1*etfox[m]'		'1*adp[c]+1*h[c]+1*pi[c]+1*HC02198[e]'	'1*atp[c]+1*HC01231[c]'	'1*coa[c]+1*aacoa[c]'	'1*arg_L[e]'	'1*crn[c]'
'1*h2o[c]+1*atp[c]+2*na1[e]+1*btn[e]'	'1*fol[c]'	'1*fol[m]'		'1*adp[c]+1*h[c]+1*pi[c]+1*arachd[x]'	'1*atp[c]+1*adn[c]'	'1*crn[c]+1*arachd[r]'	'1*ascb_L[c]'	'1*crn[r]+1*pmtcoa[r]'
'1*h2o[c]+1*cmp[c]'	'1*gdp[c]+1*trdrd[c]'	'1*fum[c]+1*so4[m]'		'1*adp[c]+1*h[c]+1*pi[c]+1*bildglcur[e]'	'1*atp[c]+1*amp[c]'	'1*crn[c]+1*pmtcrn[x]'	'1*ascb_L[e]'	'1*ctp[c]+1*trdrd[c]'
'1*h2o[c]+1*datp[c]+1*trdox[c]'	'1*gln_L[c]'	'1*fum[m]+1*so4[c]'		'1*adp[c]+1*h[c]+1*pi[c]+1*cholate[e]'	'1*atp[c]+1*coa[c]+1*lneldc[c]'	'1*ctp[c]+1*trdrd[c]'	'1*asn_L[c]+1*met_L[e]'	'1*cytd[c]+1*dutp[c]'
'1*h2o[c]+1*dctp[c]+1*trdox[c]'	'1*gln_L[m]'	'1*g3p[c]'		'1*adp[c]+1*h[c]+1*pi[c]+1*cholcoa[x]'	'1*atp[c]+1*crm_hs[c]'	'1*cys_L[c]+1*ser_L[e]'	'1*asn_L[e]+1*met_L[c]'	'1*dag_hs[c]+1*sphmyln_hs[c]'
'1*h2o[c]+1*mi14p[c]'	'1*glu_L[c]+1*mercppyr[c]'	'1*gal[l]+1*ksi_deg15[l]'		'1*adp[c]+1*h[c]+1*pi[c]+1*dgchol[e]'	'1*atp[c]+1*dag_hs[c]'	'1*cys_L[c]+1*trp_L[e]'	'1*atp[c]+1*chol[c]'	'1*datp[c]'
'1*h2o[c]+1*mi34p[c]'	'1*glu_L[e]+1*5dhf[e]'	'1*gal[l]+1*ksi_deg18[l]'		'1*adp[c]+1*h[c]+1*pi[c]+1*gchola[e]'	'1*atp[c]+1*damp[c]'	'1*cys_L[e]+1*ser_L[c]'	'1*atp[c]+1*coa[c]+1*Rtotal2[c]'	'1*datp[n]'
'1*h2o[c]+1*mi3p_D[c]'	'1*glyc3p[m]'	'1*gln_L[e]'		'1*adp[c]+1*h[c]+1*pi[c]+1*na1[e]+1*k[c]'	'1*atp[c]+1*dcdp[m]'	'1*cys_L[e]+1*trp_L[c]'	'1*atp[c]+1*coa[c]+1*Rtotal[c]'	'1*dctp[c]+1*ump[c]'
'1*h2o[c]+1*nad[c]'	'1*gthrd[c]'	'1*glu5sa[m]'		'1*adp[c]+1*h[c]+1*pi[c]+1*pchol_hs[e]'	'1*atp[c]+1*dctp[m]'	'1*dadp[n]+1*udp[n]'	'1*atp[c]+1*coa[c]+1*arach[e]'	'1*dctp[n]'
'1*h2o[c]+1*o2[c]+1*HC01522[c]'	'1*gtp[c]'	'1*glu_L[c]+1*orot[e]'		'1*adp[c]+1*h[c]+1*pi[c]+1*ppcoa[x]'	'1*atp[c]+1*f6p[c]'	'1*datp[n]+1*ump[n]'	'1*atp[c]+1*dcmp[c]'	'1*dgtp[c]'
'1*h2o[c]+1*o2[c]+1*hxan[c]'	'1*h2o2[c]+1*h[c]+1*HC00900[c]'	'1*glu_L[e]+1*6dhf[e]'		'1*adp[c]+1*h[c]+1*pi[c]+1*strdnc[e]'	'1*atp[c]+1*gly[c]+1*pram[c]'	'1*dctp[m]'	'1*atp[c]+1*didp[c]'	'1*dgtp[n]'
'1*h2o[c]+1*pydx5p[c]'	'1*h2o2[c]+1*nh4[c]+1*pydx5p[c]'	'1*glu_L[e]+1*orot[c]'		'1*adp[c]+1*h[c]+1*pi[c]+1*tdchola[e]'	'1*atp[c]+1*pail5p_hs[c]'	'1*dcyt[c]'	'1*atp[c]+1*dtdp[c]'	'1*dgtp[n]+1*adp[n]'
'1*h2o[c]+1*thmmp[c]'	'1*h2o2[c]+1*xan[c]'	'1*glu_L[m]+1*glu5sa[m]'		'1*adp[c]+1*h[c]+1*pi[c]+1*thm[e]'	'1*atp[m]+1*5fthf[m]'	'1*dcyt[e]'	'1*atp[c]+1*duri[c]'	'1*didp[c]'
'1*h2o[c]+2*atp[c]+1*hco3[c]+1*gln_L[c]'	'1*h2o2[m]+1*so4[m]'	'1*gly[c]'		'1*adp[c]+1*h[c]+1*pi[c]+1*ttdca[e]'	'1*atp[m]+1*cdp[m]'	'1*dgdp[n]+1*udp[n]'	'1*atp[c]+1*idp[c]'	'1*didp[n]'
'1*h2o[l]+1*ksi_deg31[l]'	'1*h2o[c]+1*2425dhvitd3[c]+1*nadp[c]'	'1*glyb[c]'		'1*adp[c]+1*h[c]+1*pi[c]+2*na1[c]+1*ascb_L[c]'	'1*atp[m]+1*cmp[m]'	'1*dgsn[c]'	'1*atp[c]+1*pail_hs[c]'	'1*ditp[c]'
'1*h2o[l]+1*ksii_core2_deg3[l]'	'1*h2o[c]+1*35cgmp[c]'	'1*glyb[m]'		'1*adp[m]+1*dttp[m]'	'1*atp[m]+1*dcdp[c]'	'1*dgsn[e]'	'1*atp[c]+1*pi[m]'	'1*ditp[n]'
'1*h2o[m]+1*coa[m]+1*nad[m]+1*dc2coa[m]'	'1*h2o[c]+1*atp[c]+1*C02528[c]'	'1*glyc3p[x]'		'1*adp[m]+1*dudp[m]'	'1*atp[m]+1*dcdp[m]'	'1*dgtp[c]+1*duri[c]'	'1*atp[m]+1*amp[m]'	'1*dlnlcg[c]'
'1*h2o[m]+1*coa[m]+1*nad[m]+1*fad[m]+1*dcacoa[m]'	'1*h2o[c]+1*dgdp[c]+1*trdox[c]'	'1*glyc[m]'		'1*adp[m]+1*gtp[m]'	'1*atp[m]+1*dctp[c]'	'1*dgtp[n]+1*ump[n]'	'1*atp[m]+1*dgsn[m]'	'1*elaid[c]'
'1*h2o[n]+1*pail34p_hs[n]'	'1*h2o[c]+1*fdp[c]'	'1*gmp[c]'		'1*adp[n]+1*ditp[n]'	'1*atp[m]+1*ump[m]'	'1*dhap[c]'	'1*atp[m]+1*dtmp[m]'	'1*f6p[c]'
'1*h[c]+1*HC01231[c]'	'1*h2o[c]+1*mi1p_D[c]'	'1*gthrd[e]'		'1*adp[n]+1*gtp[n]'	'1*atp[n]+1*dcdp[n]'	'1*din[c]'	'1*atp[n]+1*dgdp[n]'	'1*fad[m]+1*ibcoa[m]'
'1*h[c]+1*adprib[c]+1*ncam[c]'	'1*h2o[c]+1*nad[c]+1*2mop[c]'	'1*h2o2[m]'		'1*adp[r]+1*h[r]+1*pi[r]+1*chsterol[e]'	'1*atp[n]+1*dcyt[n]'	'1*din[e]'	'1*atp[n]+1*gdp[n]'	'1*fad[m]+1*q10h2[m]'
'1*h[c]+1*akg[m]+1*cit[c]'	'1*h2o[c]+1*nad[c]+1*34dhmald[c]'	'1*h2o2[x]+1*HC01414[x]'		'1*adp[x]'	'1*atp[r]+1*coa[r]+1*ocdcea[r]'	'1*dlnlcg[e]'	'1*atp[n]+1*idp[n]'	'1*fad[r]+1*zymstnl[r]'
'1*h[c]+1*ala_D[c]'	'1*h2o[c]+1*nad[c]+1*34dhpac[c]'	'1*h2o[c]+1*11_cis_retfa[c]'		'1*ahcys[c]'	'1*bildglcur[r]'	'1*drib[e]'	'1*atp[n]+1*pail_hs[n]'	'1*fadh2[m]+1*2mp2coa[m]'
'1*h[c]+1*dag_hs[c]+1*mi14p[c]'	'1*h2o[c]+1*nad[c]+1*acald[c]'	'1*h2o[c]+1*aacoa[c]+1*accoa[c]'		'1*ahcys[e]'	'1*bilirub[c]'	'1*dtmp[c]'	'1*avite2[c]'	'1*fadh2[m]+1*q10[m]'
'1*h[c]+1*lys_L[c]+1*orn[m]'	'1*h2o[c]+1*nadp[c]+1*34dhmald[c]'	'1*h2o[c]+1*atp[c]+1*cholcoa[c]'		'1*akg[c]+1*2hb[e]'	'1*btcoa[m]+1*crn[m]'	'1*dtmp[m]'	'1*avite2[e]'	'1*fe2[e]'
'1*h[c]+1*nadh[c]+1*3dhguln[c]'	'1*h2o[c]+1*nadp[c]+1*34dhpac[c]'	'1*h2o[c]+1*atp[c]+1*dgchol[c]'		'1*akg[c]+1*HC00342[m]'	'1*camp[e]'	'1*duri[e]'	'1*bilirub[r]'	'1*fprica[c]'
'1*h[c]+1*nadh[c]+1*fad[c]'	'1*h2o[c]+1*nadp[c]+1*6hoxmelatn[c]'	'1*h2o[c]+1*atp[c]+1*dlnlcg[c]'		'1*akg[c]+1*ac[e]'	'1*cdp[c]+1*dcdp[c]'	'1*fald[c]+1*gthrd[c]'	'1*bvite[c]'	'1*fprica[c]+1*thf[c]'
'1*h[c]+1*orn[c]+1*citr_L[m]'	'1*h2o[c]+1*nadp[c]+1*CE4874[c]'	'1*h2o[c]+1*atp[c]+1*elaid[c]'		'1*akg[c]+1*bhb[e]'	'1*cdpchol[c]+1*dag_hs[c]'	'1*fol[c]'	'1*bvite[e]'	'1*gchola[c]'
'1*h[c]+1*orn[c]+1*lys_L[m]'	'1*h2o[c]+1*nadp[c]+1*acald[c]'	'1*h2o[c]+1*atp[c]+1*gln_L[c]+1*fgam[c]'		'1*akg[c]+1*for[e]'	'1*chol[g]'	'1*fol[e]'	'1*cbasp[e]'	'1*gchola[e]'
'1*h[c]+1*thf[c]+1*fgam[c]'	'1*h2o[c]+1*o2[c]+1*2mop[c]'	'1*h2o[c]+1*atp[c]+1*gthrd[c]'		'1*akg[c]+1*icit[x]'	'1*cholp[g]'	'1*fol[m]'	'1*cdp[c]+1*dgdp[c]'	'1*gln_L[c]+1*phe_L[e]'
'1*h[c]+1*udp[c]+1*fdp[c]'	'1*h2o[c]+1*o2[c]+1*hxan[c]'	'1*h2o[c]+1*atp[c]+1*hdcea[c]'		'1*akg[c]+1*lac_L[e]'	'1*chsterol[r]+1*odecoa[r]'	'1*frdp[c]'	'1*cdp[n]+1*dadp[n]'	'1*gln_L[c]+1*trp_L[e]'
'1*h[e]+1*ala_D[e]'	'1*h2o[c]+1*o2[c]+1*pyam5p[c]'	'1*h2o[c]+1*atp[c]+1*lnlnca[c]'		'1*akg[c]+1*na1[c]'	'1*co2[c]+1*air[c]'	'1*frdp[r]'	'1*cdpchol[c]+1*dag_hs[c]'	'1*gln_L[e]+1*phe_L[c]'
'1*h[g]+1*udp[g]+1*core8[g]'	'1*h2o[c]+1*o2[c]+1*spmd[c]'	'1*h2o[c]+1*bamppald[c]+1*nad[c]'		'1*akg[c]+1*pyr[e]'	'1*co2[m]+1*nadh[m]+1*nh4[m]+1*mlthf[m]'	'1*frdp[x]'	'1*cdpdag_hs[c]+1*glyc3p[c]'	'1*gln_L[e]+1*trp_L[c]'
'1*h[l]+1*so4[l]+1*ksii_core2_deg4[l]'	'1*h2o[c]+1*pail3p_hs[c]'	'1*h2o[c]+1*f26bp[c]'		'1*akg[c]+1*retn[e]'	'1*coa[c]+1*HC02149[c]'	'1*g3p[c]'	'1*cdpdag_hs[c]+1*pglyc_hs[c]'	'1*glu_L[c]+1*pro_L[m]'
'1*h[m]+1*adp[m]+1*pi[m]+1*oaa[m]'	'1*h2o[c]+1*pap[c]'	'1*h2o[c]+1*fol[e]'		'1*akg[e]+1*bhb[c]'	'1*coa[m]+1*HC02149[m]'	'1*g3p[c]+1*f6p[c]'	'1*chol[e]'	'1*glu_L[e]'
'1*h[m]+1*akg[c]+1*cit[m]'	'1*h2o[c]+1*thmmp[m]'	'1*h2o[c]+1*glu_L[c]+1*kynate[c]'		'1*akg[e]+1*for[c]'	'1*coa[m]+1*c4crn[m]'	'1*g3p[c]+1*s7p[c]'	'1*cholcoa[c]'	'1*glu_L[m]+1*glu5sa[m]'
'1*h[m]+1*lys_L[c]+1*orn[m]'	'1*h2o[c]+1*ump[c]'	'1*h2o[c]+1*h[c]+1*cytd[c]'		'1*akg[e]+1*lac_L[c]'	'1*coa[r]+1*HC02023[r]'	'1*gchola[c]'	'1*cholcoa[x]'	'1*glu_L[m]+1*nh4[m]'
'1*h[m]+1*nadh[m]+1*accoa[m]+1*fadh2[m]+1*occoa[m]'	'1*h2o[e]+1*6dhf[e]'	'1*h2o[c]+1*nad[c]+1*hxan[c]'		'1*akg[e]+1*retn[c]'	'1*coa[x]+1*atp[x]+1*phyt[x]'	'1*gchola[e]'	'1*chsterol[c]'	'1*glu_L[m]+1*pro_L[c]'
'1*h[m]+1*nadh[m]+1*accoa[m]+1*occoa[m]'	'1*h2o[e]+1*udp[e]'	'1*h2o[c]+1*nmn[c]'		'1*akg[m]+1*3aib_D[m]'	'1*core5[g]'	'1*gdp[c]+1*gtp[m]'	'1*chsterol[e]'	'1*gly[c]+1*ile_L[e]'
'1*h[m]+1*orn[c]+1*lys_L[m]'	'1*h2o[e]+1*ump[e]'	'1*h2o[c]+1*pail45p_hs[c]'		'1*akg[m]+1*HC00342[c]'	'1*core7[g]'	'1*glac[c]'	'1*chsterol[m]'	'1*gly[c]+1*phe_L[e]'
'1*h[m]+1*orn[m]+1*citr_L[c]'	'1*h2o[m]+1*HC00591[m]'	'1*h2o[c]+1*pail_hs[c]'		'1*akg[m]+1*ala_L[m]'	'1*creat[c]'	'1*glac[r]'	'1*cit[c]+1*icit[m]'	'1*gly[e]+1*ile_L[c]'
'1*h[r]+1*nadph[r]+1*zym_int2[r]'	'1*h2o[m]+1*hdd2coa[m]'	'1*h2o[c]+1*pan4p[c]'		'1*akg[m]+1*co2[m]+1*nadh[m]'	'1*crm_hs[r]'	'1*glc_D[c]'	'1*cit[c]+1*succ[m]'	'1*gly[e]+1*phe_L[c]'
'1*h[x]'	'1*h2o[m]+1*nad[m]+1*acald[m]'	'1*h2o[c]+1*ppi[c]'		'1*ala_B[c]'	'1*crn[c]+1*HC02149[m]'	'1*glc_D[e]'	'1*cit[m]+1*succ[c]'	'1*glyc3p[c]'
'1*h[x]+1*nadh[x]+1*accoa[x]+1*h2o2[x]+1*btcoa[x]'	'1*h2o[m]+1*thmmp[c]'	'1*h2o[c]+1*retfa[c]'		'1*ala_D[e]'	'1*crn[c]+1*pcrn[x]'	'1*glc_D[r]'	'1*cmp[c]+1*dgtp[c]'	'1*gthrd[c]'
'1*h[x]+1*nadh[x]+1*accoa[x]+1*occoa[x]+1*h2o2[x]'	'1*h2o[n]+1*ppi[n]'	'1*h2o[c]+2*nadp[c]+1*co2[c]+1*coa[c]+1*pmtcoa[c]'		'1*ala_L[c]'	'1*crn[m]+1*HC02149[c]'	'1*glcur[c]'	'1*cmp[n]+1*datp[n]'	'1*gua[c]+1*r1p[c]'
'1*lnlncg[c]'	'1*h2o[x]+1*atp[x]+1*tdchola[x]'	'1*h2o[e]+1*7dhf[e]'		'1*ala_L[c]+1*HC00591[c]'	'1*crn[x]+1*pcrn[c]'	'1*glcur[r]'	'1*co2[c]+1*3dsphgn[c]+1*coa[c]'	'1*h2o2[c]+1*h[c]+1*HC00900[c]'
'1*m4mpdol_L[c]'	'1*h2o[x]+1*ppi[x]'	'1*h2o[e]+1*biocyt[e]'		'1*ala_L[c]+1*phe_L[e]'	'1*ctp[n]+1*ump[n]'	'1*gln_L[c]+1*gly[e]'	'1*co2[e]'	'1*h2o2[c]+1*nh4[c]+1*pydx5p[c]'
'1*m4mpdol_L[r]'	'1*h[c]+1*acetone[c]'	'1*h2o[e]+1*fol[c]'		'1*ala_L[c]+1*ser_L[e]'	'1*cys_L[c]+1*gly[e]'	'1*gln_L[c]+1*met_L[e]'	'1*co2[m]'	'1*h2o[c]+1*1mncam[c]+1*atp[c]'
'1*na1[c]+1*ala_L[c]+1*ser_L[e]'	'1*h[c]+1*amet[c]'	'1*h2o[e]+1*pchol_hs[e]'		'1*ala_L[e]+1*phe_L[c]'	'1*cys_L[c]+1*hom_L[e]'	'1*gln_L[c]+1*phe_L[e]'	'1*co2[m]+1*nadh[m]+1*ibcoa[m]'	'1*h2o[c]+1*aacoa[c]+1*accoa[c]'
'1*na1[c]+1*ala_L[c]+1*thr_L[e]'	'1*h[c]+1*arg_L[m]+1*citr_L[c]'	'1*h2o[e]+1*retfa[e]'		'1*ala_L[e]+1*ser_L[c]'	'1*cys_L[c]+1*leu_L[e]'	'1*gln_L[c]+1*trp_L[e]'	'1*coa[c]+1*HC02149[c]'	'1*h2o[c]+1*atp[c]+1*pe_hs[e]'
'1*na1[c]+1*ala_L[c]+1*tyr_L[e]'	'1*h[c]+1*cit[c]'	'1*h2o[g]+1*m5masnB2[g]'		'1*amet[c]'	'1*cys_L[e]+1*gly[c]'	'1*gln_L[c]+1*tyr_L[e]'	'1*coa[c]+1*acrn[c]'	'1*h2o[c]+1*atp[c]+1*phyQ[e]'
'1*na1[c]+1*ala_L[e]+1*ile_L[c]'	'1*h[c]+1*citr_L[c]+1*his_L[m]'	'1*h2o[g]+1*m6masnA[g]'		'1*amet[c]+1*hista[c]'	'1*cys_L[e]+1*hom_L[c]'	'1*gln_L[e]+1*gly[c]'	'1*coa[m]'	'1*h2o[c]+1*atp[c]+1*ps_hs[c]'
'1*na1[c]+1*arg_L[e]+1*leu_L[c]'	'1*h[c]+1*citr_L[m]+1*his_L[c]'	'1*h2o[l]+1*crm_hs[l]'		'1*amet[c]+1*ncam[c]'	'1*cys_L[e]+1*leu_L[c]'	'1*gln_L[e]+1*met_L[c]'	'1*coa[m]+1*HC02149[m]'	'1*h2o[c]+1*atp[c]+1*ribflv[e]'
'1*na1[c]+1*asn_L[c]+1*ser_L[e]'	'1*h[c]+1*cmp[c]+1*pchol_hs[c]'	'1*h2o[l]+1*galside_hs[l]'		'1*amp[c]+1*ppi[c]+1*arachcoa[c]'	'1*dadp[c]+1*dcdp[c]'	'1*gln_L[e]+1*phe_L[c]'	'1*coa[m]+1*nad[m]+1*3mob[m]'	'1*h2o[c]+1*atp[c]+1*strdnc[c]'
'1*na1[c]+1*asn_L[c]+1*val_L[e]'	'1*h[c]+1*ctp[c]+1*cholp[c]'	'1*h2o[l]+1*ksi_deg14[l]'		'1*amp[c]+1*ppi[c]+1*hdd2coa[c]'	'1*dadp[c]+1*dttp[m]'	'1*gln_L[e]+1*trp_L[c]'	'1*coa[x]+1*acrn[x]'	'1*h2o[c]+1*atp[c]+1*tchola[c]'
'1*na1[c]+1*asn_L[e]+1*val_L[c]'	'1*h[c]+1*dadp[c]+1*f6p[c]'	'1*h2o[l]+1*ksi_deg16[l]'		'1*amp[c]+1*ppi[c]+1*octd11ecoa[c]'	'1*dadp[c]+1*dutp[m]'	'1*gln_L[e]+1*tyr_L[c]'	'1*crn[c]+1*HC02149[m]'	'1*h2o[c]+1*dctp[c]+1*trdox[c]'
'1*na1[c]+1*cys_L[c]+1*gly[e]'	'1*h[c]+1*fe2[c]'	'1*h2o[l]+1*ksi_deg17[l]'		'1*amp[c]+1*ppi[c]+1*stcoa[c]'	'1*dadp[m]+1*dgdp[m]'	'1*glu5sa[c]'	'1*crn[c]+1*acrn[x]'	'1*h2o[c]+1*fdp[c]'
'1*na1[c]+1*gln_L[c]+1*gly[e]'	'1*h[c]+1*gmp[c]'	'1*h2o[m]+1*asn_L[m]'		'1*amp[c]+1*ppi[c]+1*vacccoa[c]'	'1*dadp[m]+1*dttp[c]'	'1*glu_L[c]+1*leuktrD4[c]'	'1*crn[c]+1*lnlc[r]'	'1*h2o[c]+1*g3pc[c]'
'1*na1[c]+1*gln_L[c]+1*ile_L[e]'	'1*h[c]+1*nadh[c]+1*3dhguln[c]'	'1*h2o[m]+1*coa[m]+1*nad[m]+1*2ddecdicoa[m]'		'1*amp[x]+1*ppi[x]+1*phytcoa[x]'	'1*dadp[m]+1*dutp[c]'	'1*glu_L[c]+1*leuktrE4[c]'	'1*crn[c]+1*lnlncg[r]'	'1*h2o[c]+1*gmp[c]'
'1*na1[c]+1*gln_L[c]+1*ser_L[e]'	'1*h[c]+1*nadh[c]+1*dhbpt[c]'	'1*h2o[m]+1*coa[m]+1*nad[m]+1*fad[m]+1*hexddcoa[m]'		'1*andrstrn[r]+1*nadp[r]'	'1*dag_hs[c]+1*sphmyln_hs[c]'	'1*glu_L[c]+1*pro_L[m]'	'1*crn[c]+1*strdnc[r]'	'1*h2o[c]+1*imp[c]'
'1*na1[c]+1*gln_L[e]+1*thr_L[c]'	'1*h[c]+1*nadh[c]+1*glc_D[c]'	'1*h2o[m]+1*coa[m]+1*nad[m]+1*fad[m]+1*lnlccoa[m]'		'1*arachd[c]'	'1*datp[c]'	'1*glu_L[e]+1*5thf[e]'	'1*crn[m]+1*HC02149[c]'	'1*h2o[c]+1*leuktrC4[c]'
'1*na1[c]+1*gln_L[e]+1*val_L[c]'	'1*h[c]+1*nadh[c]+1*lald_L[c]'	'1*h2o[m]+1*coa[m]+1*nad[m]+1*fad[m]+1*tetdecdicoa[m]'		'1*arg_L[e]'	'1*datp[c]+1*dcmp[c]'	'1*glu_L[e]+1*6thf[e]'	'1*crn[r]+1*lnlc[c]'	'1*h2o[c]+1*lpchol_hs[c]'
'1*na1[c]+1*gly[c]+1*leu_L[e]'	'1*h[c]+1*nadh[c]+1*mercplaccys[c]'	'1*h2o[m]+1*nad[m]+1*acald[m]'		'1*asn_L[c]'	'1*datp[m]+1*dgmp[m]'	'1*glu_L[m]+1*pro_L[c]'	'1*crn[r]+1*lnlncg[c]'	'1*h2o[c]+1*o2[c]+1*2mop[c]'
'1*na1[c]+1*gly[c]+1*lys_L[e]'	'1*h[c]+1*nadph[c]+1*acetol[c]'	'1*h2o[m]+1*nadp[m]+1*thcholstoic[m]'		'1*asp_D[c]'	'1*dcdp[c]+1*dudp[m]'	'1*gly[c]+1*hom_L[e]'	'1*crn[r]+1*strdnc[c]'	'1*h2o[c]+1*o2[c]+1*pyam5p[c]'
'1*na1[c]+1*gly[e]+1*hom_L[c]'	'1*h[c]+1*nadph[c]+1*mthgxl[c]'	'1*h2o[r]+1*atp[r]+1*chsterol[r]'		'1*asp_D[e]'	'1*dcdp[m]+1*dudp[c]'	'1*gly[c]+1*leuktrE4[c]'	'1*ctp[n]+1*ump[n]'	'1*h2o[c]+1*pa_hs[c]'
'1*na1[c]+1*ile_L[e]+1*pro_L[c]'	'1*h[c]+1*nadph[c]+1*retinal_11_cis[c]'	'1*h2o[r]+1*pchol_hs[r]'		'1*atp[c]+1*3pg[c]'	'1*dctp[m]'	'1*gly[c]+1*leuktrF4[c]'	'1*cys_L[c]+1*phe_L[e]'	'1*h2o[c]+1*pgp_hs[c]'
'1*na1[c]+1*k[c]+2*cl[c]'	'1*h[c]+1*nadph[c]+1*retinal_cis_9[c]'	'1*h2o[x]+1*HC01414[x]'		'1*atp[c]+1*acmana[c]'	'1*dctp[n]+1*adp[n]'	'1*gly[c]+1*trp_L[e]'	'1*cys_L[c]+1*ser_L[e]'	'1*h2o[c]+2*atp[c]+1*hco3[c]+1*gln_L[c]'
'1*na1[c]+1*pro_L[e]+1*phe_L[c]'	'1*h[c]+1*oaa[c]'	'1*h[c]+1*3dhguln[c]'		'1*atp[c]+1*cmp[c]'	'1*dgtp[c]+1*dtdp[m]'	'1*gly[e]+1*hom_L[c]'	'1*cys_L[c]+1*trp_L[e]'	'1*h2o[e]+1*xolest2_hs[e]'
'1*na1[c]+1*ser_L[e]+1*ile_L[c]'	'1*h[c]+1*orn[c]+1*arg_L[m]'	'1*h[c]+1*Rtotal2[c]+1*retinol[c]'		'1*atp[c]+1*coa[c]+1*ocdca[c]'	'1*dgtp[c]+1*ump[c]'	'1*gly[e]+1*trp_L[c]'	'1*cys_L[e]'	'1*h2o[m]+1*HC01223[m]'
'1*na1[c]+1*ser_L[e]+1*val_L[c]'	'1*h[c]+1*pep[c]+1*cdp[c]'	'1*h[c]+1*Rtotal2[c]+1*retinol_cis_11[c]'		'1*atp[c]+1*coa[c]+1*vacc[c]'	'1*dgtp[m]+1*dtdp[c]'	'1*glyc3p[m]'	'1*cys_L[e]+1*phe_L[c]'	'1*h2o[m]+1*gln_L[m]'
'1*na1[e]+1*ala_L[c]+1*ile_L[e]'	'1*h[c]+1*pyr[c]+1*nadh[c]'	'1*h[c]+1*arg_L[e]+1*met_L[c]'		'1*atp[c]+1*coa[c]+1*vacc[e]'	'1*dgtp[n]'	'1*glyc[c]'	'1*cys_L[e]+1*ser_L[c]'	'1*h2o[n]+1*pail4p_hs[n]'
'1*na1[e]+1*ala_L[e]+1*ser_L[c]'	'1*h[c]+1*sprm[c]+1*5mta[c]'	'1*h[c]+1*btn[c]'		'1*atp[c]+1*cys_L[c]+1*4ppan[c]'	'1*dhcholestanate[m]'	'1*glyc[e]'	'1*cys_L[e]+1*trp_L[c]'	'1*h2o[r]+1*nad[r]+1*retinal_cis_9[r]'
'1*na1[e]+1*ala_L[e]+1*thr_L[c]'	'1*h[c]+1*thf[c]+1*met_L[c]'	'1*h[c]+1*coa[c]+1*dhcrm_hs[c]'		'1*atp[c]+1*dcdp[c]'	'1*dhcholestanate[x]'	'1*gtp[c]+1*gdp[m]'	'1*dad_2[c]'	'1*h2o[r]+1*udp[r]'
'1*na1[e]+1*ala_L[e]+1*tyr_L[c]'	'1*h[e]+1*acac[e]'	'1*h[c]+1*coa[c]+1*hmgcoa[c]'		'1*atp[c]+1*dtdp[c]'	'1*din[c]'	'1*gtp[c]+1*trdrd[c]'	'1*dad_2[e]'	'1*h2o[x]+1*atp[x]+1*tdchola[x]'
'1*na1[e]+1*arg_L[c]+1*leu_L[e]'	'1*h[e]+1*cit[e]'	'1*h[c]+1*fe2[c]'		'1*atp[c]+1*gdp[c]'	'1*din[e]'	'1*gullac[c]'	'1*dadp[n]+1*dttp[n]'	'1*h[c]+1*2obut[c]+1*nadh[c]'
'1*na1[e]+1*asn_L[c]+1*val_L[e]'	'1*h[e]+1*fe2[e]'	'1*h[c]+1*fol[c]'		'1*atp[c]+1*gmp[c]'	'1*dmnoncrn[x]'	'1*gullac[r]'	'1*dag_hs[c]+1*sphmyln_hs[c]'	'1*h[c]+1*Rtotal[c]+1*g3pc[c]'
'1*na1[e]+1*asn_L[e]+1*ser_L[c]'	'1*h[e]+1*pi[e]+1*ump[e]'	'1*h[c]+1*glcur[c]'		'1*atp[c]+1*pail5p_hs[c]'	'1*dtdp[c]+1*dudp[m]'	'1*h2o2[c]+1*h[c]+1*HC00460[c]'	'1*datp[m]'	'1*h[c]+1*amp[c]+1*dgdp[c]'
'1*na1[e]+1*asn_L[e]+1*val_L[c]'	'1*h[m]+1*acac[m]'	'1*h[c]+1*nac[c]+1*r1p[c]'		'1*atp[c]+1*ptth[c]'	'1*dtdp[m]+1*dudp[c]'	'1*h2o2[c]+1*h[c]+1*HC00900[c]'	'1*datp[n]'	'1*h[c]+1*amp[c]+1*prpp[c]'
'1*na1[e]+1*cys_L[e]+1*gly[c]'	'1*h[m]+1*acetone[m]'	'1*h[c]+1*nadh[c]+1*dhbpt[c]'		'1*atp[c]+1*pydxn[c]'	'1*dttp[m]'	'1*h2o2[c]+1*pydx[c]'	'1*datp[n]+1*dtdp[n]'	'1*h[c]+1*chol[c]+1*glyc3p[c]'
'1*na1[e]+1*gln_L[c]+1*thr_L[e]'	'1*h[m]+1*adp[m]+1*amp[m]'	'1*h[c]+1*nadh[c]+1*fad[c]'		'1*atp[m]+1*CE5101[m]'	'1*estradiol[c]'	'1*h2o2[c]+2*gthrd[c]'	'1*dcmp[n]+1*utp[n]'	'1*h[c]+1*cmp[c]+1*clpn_hs[c]'
'1*na1[e]+1*gln_L[c]+1*val_L[e]'	'1*h[m]+1*arg_L[c]+1*citr_L[m]'	'1*h[c]+1*nadh[c]+1*xan[c]'		'1*atp[m]+1*dtdp[m]'	'1*estradiol[r]'	'1*h2o[c]'	'1*dctp[m]'	'1*h[c]+1*cmp[c]+1*dudp[c]'
'1*na1[e]+1*gln_L[e]+1*gly[c]'	'1*h[m]+1*arg_L[c]+1*orn[m]'	'1*h[c]+1*nadh[c]+1*xol7ah2al[c]'		'1*atp[m]+1*dump[m]'	'1*fad[m]+1*CE0849[m]'	'1*h2o[c]+1*CE2088[c]'	'1*dctp[n]'	'1*h[c]+1*cmp[c]+1*pail_hs[c]'
'1*na1[e]+1*gln_L[e]+1*ile_L[c]'	'1*h[m]+1*atp[m]+1*pan4p[m]'	'1*h[c]+1*prpp[c]+1*nac[c]'		'1*atp[m]+1*gdp[m]'	'1*fad[m]+1*succ[m]'	'1*h2o[c]+1*CE2705[c]'	'1*dcyt[c]'	'1*h[c]+1*cmp[c]+1*pchol_hs[c]'
'1*na1[e]+1*gln_L[e]+1*ser_L[c]'	'1*h[m]+1*citr_L[c]+1*his_L[m]'	'1*h[c]+2*pi[c]'		'1*atp[m]+1*glyc[m]'	'1*fadh2[m]+1*CE2433[m]'	'1*h2o[c]+1*CE5236[c]'	'1*dcyt[e]'	'1*h[c]+1*cmp[c]+1*pgp_hs[c]'
'1*na1[e]+1*gly[c]+1*hom_L[e]'	'1*h[m]+1*citr_L[m]+1*his_L[c]'	'1*h[e]+1*arg_L[c]+1*met_L[e]'		'1*atp[n]+1*dcdp[n]'	'1*fadh2[m]+1*fum[m]'	'1*h2o[c]+1*atp[c]+1*arachdcoa[c]'	'1*dgmp[c]'	'1*h[c]+1*coa[c]+1*dhcrm_hs[c]'
'1*na1[e]+1*gly[e]+1*leu_L[c]'	'1*h[m]+1*coa[m]+1*adp[m]'	'1*h[e]+1*btn[e]'		'1*atp[n]+1*dcmp[n]'	'1*fol[c]+1*oh1[e]'	'1*h2o[c]+1*atp[c]+1*gthrd[c]'	'1*dgmp[m]'	'1*h[c]+1*coa[c]+1*hmgcoa[c]'
'1*na1[e]+1*gly[e]+1*lys_L[c]'	'1*h[m]+1*dgdp[m]+1*dump[m]'	'1*h[e]+1*fol[e]'		'1*atp[n]+1*didp[n]'	'1*fol[e]+1*oh1[c]'	'1*h2o[c]+1*dctp[c]+1*trdox[c]'	'1*dgsn[m]'	'1*h[c]+1*ctp[c]+1*cholp[c]'
'1*na1[e]+1*k[e]+2*cl[e]'	'1*h[m]+1*nadh[m]+1*3ohdcoa[m]'	'1*h[e]+1*lpchol_hs[e]+1*Rtotal2[e]'		'1*atp[n]+1*gdp[n]'	'1*g1p[c]'	'1*h2o[c]+1*dgmp[c]'	'1*dgtp[c]'	'1*h[c]+1*idp[c]+1*g6p[c]'
'1*na1[e]+1*phe_L[e]+1*pro_L[c]'	'1*h[m]+1*nadh[m]+1*gthox[m]'	'1*h[e]+1*pi[e]+1*udp[e]'		'1*atp[n]+1*pail34p_hs[n]'	'1*gal[l]+1*ksi_deg33[l]'	'1*h2o[c]+1*dgtp[c]+1*trdox[c]'	'1*dgtp[c]+1*ump[c]'	'1*h[c]+1*lac_L[c]'
'1*na1[e]+1*pro_L[e]+1*ile_L[c]'	'1*h[n]+2*pi[n]'	'1*h[e]+1*retinol[e]+1*Rtotal2[e]'		'1*atp[n]+1*pail5p_hs[n]'	'1*gdpfuc[g]+1*n2m2masn[g]'	'1*h2o[c]+1*leuktrC4[c]'	'1*dgtp[m]+1*duri[m]'	'1*h[c]+1*nadh[c]+1*oaa[c]'
'1*na1[e]+1*ser_L[c]+1*ile_L[e]'	'1*h[x]+1*adp[x]+1*pi[x]+1*tdchola[e]'	'1*h[g]+1*pi[g]+1*ump[g]'		'1*atp[n]+1*ump[n]'	'1*gdpmann[c]'	'1*h2o[c]+1*leuktrD4[c]'	'1*dgtp[n]'	'1*h[c]+1*nadph[c]+1*3dsphgn[c]'
'1*na1[e]+1*ser_L[c]+1*val_L[e]'	'1*h[x]+1*coa[x]+1*hmgcoa[x]'	'1*h[g]+1*udp[g]+1*galside_hs[g]'		'1*avite2[c]'	'1*glc_D[c]+1*glygn3[c]'	'1*h2o[c]+1*leuktrF4[c]'	'1*dgtp[n]+1*adp[n]'	'1*h[c]+1*orot5p[c]'
'1*nad[c]+1*5mthf[c]'	'1*h[x]+2*pi[x]'	'1*h[l]+1*acgam[l]+1*so4[l]+1*ksi_deg26[l]'		'1*avite2[e]'	'1*glcur[l]+1*ha_deg1[l]'	'1*h2o[c]+1*melatn[c]'	'1*dhap[x]'	'1*h[c]+1*pa_hs[c]+1*ctp[c]'
'1*nad[c]+1*fadh2[c]'	'1*hco3[c]+1*bildglcur[e]+1*gthrd[c]'	'1*h[l]+1*glcur[l]'		'1*bhb[c]+1*lac_L[e]'	'1*glu_L[m]+1*4mop[m]'	'1*h2o[c]+1*nadp[c]+1*hretn[c]'	'1*dhdascb[c]+2*gthrd[c]'	'1*h[c]+1*prpp[c]+1*nac[c]'
'1*nad[c]+1*guln[c]'	'1*hco3[c]+1*gthrd[c]+1*leuktrC4[e]'	'1*h[m]+1*adp[m]+1*cmp[m]'		'1*bhb[e]+1*lac_L[c]'	'1*glu_L[m]+1*sucsal[m]'	'1*h2o[c]+1*nmn[c]'	'1*din[c]'	'1*h[c]+1*pyr[c]+1*nadh[c]'
'1*nad[x]+1*coa[x]+1*dcacoa[x]+1*o2[x]+1*h2o[x]'	'1*hco3[c]+1*gthrd[c]+1*leuktrD4[e]'	'1*h[m]+1*adp[m]+1*dump[m]'		'1*bildglcur[c]'	'1*gly[c]+1*leuktrE4[c]'	'1*h2o[c]+1*o2[c]+1*2mop[c]'	'1*din[e]'	'1*h[c]+1*ser_L[c]+1*pmtcoa[c]'
'1*nad[x]+1*coa[x]+1*o2[x]+1*h2o[x]+1*hxcoa[x]'	'1*hco3[c]+1*gthrd[c]+1*leuktrE4[e]'	'1*h[m]+1*adp[m]+1*glyc3p[m]'		'1*bildglcur[e]'	'1*glygn1[c]'	'1*h2o[c]+1*o2[c]+1*HC01522[c]'	'1*dlnlcg[e]'	'1*h[e]+1*chsterol[e]+1*Rtotal[e]'
'1*nadp[c]'	'1*hco3[c]+1*gthrd[c]+1*leuktrF4[e]'	'1*h[m]+1*nadh[m]+1*CE0693[m]'		'1*bilirub[c]'	'1*glygn2[c]'	'1*h2o[c]+1*odecoa[c]'	'1*dtmp[c]'	'1*h[m]+1*atp[m]+1*pan4p[m]'
'1*nadp[r]'	'1*hco3[e]+1*bildglcur[c]+1*gthrd[e]'	'1*h[m]+1*nadh[m]+1*accoa[m]+1*dece4coa[m]'		'1*btcoa[m]+1*crn[m]'	'1*gthrd[c]'	'1*h2o[e]+1*6thf[e]'	'1*dtmp[m]'	'1*h[m]+1*coa[m]+1*adp[m]'
'1*nadp[r]+1*zymst[r]'	'1*hco3[e]+1*gthrd[e]+1*leuktrC4[c]'	'1*h[m]+1*nadh[m]+1*accoa[m]+1*fadh2[m]+1*3ddecdicoa[m]'		'1*btn[c]'	'1*gullac[c]'	'1*h2o[e]+1*7thf[e]'	'1*dttp[c]'	'1*h[m]+1*nadh[m]+1*3oddcoa[m]'
'1*nadph[c]'	'1*hco3[e]+1*gthrd[e]+1*leuktrD4[c]'	'1*h[m]+1*nadh[m]+1*accoa[m]+1*fadh2[m]+1*hexddcoa[m]'		'1*btn[e]'	'1*gullac[r]'	'1*h2o[l]+1*coa[l]'	'1*dump[m]'	'1*h[m]+1*nadph[m]+1*HC01412[m]'
'1*nadph[r]'	'1*hco3[e]+1*gthrd[e]+1*leuktrE4[c]'	'1*h[m]+1*nadh[m]+1*accoa[m]+1*fadh2[m]+1*tetdecdicoa[m]'		'1*bvite[c]'	'1*h2o2[c]+1*h[c]+1*HC00900[c]'	'1*h2o[m]+1*gly[m]+1*mlthf[m]'	'1*fad[m]+1*ibcoa[m]'	'1*h[m]+1*nadph[m]+1*HC01434[m]'
'1*nh4[c]+4*na1[e]+1*ca2[c]'	'1*hco3[e]+1*gthrd[e]+1*leuktrF4[c]'	'1*h[m]+1*nadh[m]+1*gthox[m]'		'1*bvite[e]'	'1*h2o2[c]+1*nh4[c]+1*pydx5p[c]'	'1*h2o[m]+1*nad[m]+1*sucsal[m]'	'1*fadh2[m]+1*2mp2coa[m]'	'1*h[m]+1*nadph[m]+1*gthox[m]'
'1*o2[m]+1*CE2431[m]'	'1*hdca[c]'	'1*h[m]+1*nadph[m]+1*dec24dicoa[m]'		'1*c4crn[m]'	'1*h2o[c]+1*CE2705[c]'	'1*h2o[r]+1*C05957[r]'	'1*fe2[e]'	'1*h[m]+1*ps_hs[m]'
'1*oretn[c]'	'1*hdca[r]'	'1*h[m]+1*nadph[m]+1*thcholst[m]'		'1*cbasp[e]'	'1*h2o[c]+1*CE5236[c]'	'1*h2o[r]+1*CE4876[r]'	'1*frdp[c]'	'1*h[n]+1*dcmp[n]+1*udp[n]'
'1*pcrn[x]'	'1*hdcecrn[c]'	'1*h[r]+1*chol[r]+1*pa_hs[r]'		'1*cdp[c]+1*dcdp[c]'	'1*h2o[c]+1*arachcoa[c]'	'1*h[c]+1*3dhguln[c]'	'1*frdp[r]'	'1*h[r]+1*nadph[r]+1*HC01118[r]'
'1*pi[c]+1*cytd[c]'	'1*hdcecrn[m]'	'1*h[r]+1*nadh[r]+1*6pgl[r]'		'1*cdp[n]+1*dgdp[n]'	'1*h2o[c]+1*atp[c]+1*bildglcur[c]'	'1*h[c]+1*coa[c]+1*ocdcea[c]'	'1*frdp[x]'	'1*h[r]+1*pi[r]+1*ump[r]'
'1*pi[c]+1*mi1p_D[c]'	'1*hdd2coa[m]+1*q10h2[m]'	'1*h[x]+1*nadh[x]+1*3odcoa[x]'		'1*cdp[n]+1*gdp[n]'	'1*h2o[c]+1*atp[c]+1*camp[c]'	'1*h[c]+1*dgdp[c]+1*dump[c]'	'1*fum[c]+1*aicar[c]'	'1*h[x]+1*adp[x]+1*pi[x]+1*tdchola[e]'
'1*pi[c]+1*mi34p[c]'	'1*hmgcoa[c]'	'1*h[x]+1*nadh[x]+1*accoa[x]+1*occoa[x]+1*h2o2[x]'		'1*cdpdag_hs[c]+1*inost[c]'	'1*h2o[c]+1*atp[c]+1*gln_L[c]+1*utp[c]'	'1*h[c]+1*g1p[c]+1*utp[c]'	'1*g1p[c]'	'1*h[x]+1*lac_L[x]'
'1*pi[c]+1*mi3p_D[c]'	'1*hmgcoa[x]'	'1*ha_pre1[e]'		'1*chol[e]'	'1*h2o[c]+1*atp[c]+1*lgnc[c]'	'1*h[c]+1*nadh[c]+1*Sfglutth[c]'	'1*g6p[c]'	'1*h[x]+1*nadh[x]+1*accoa[x]+1*dcacoa[x]'
'1*pi[c]+1*pydx[c]'	'1*hom_L[e]+1*trp_L[c]'	'1*hco3[c]+1*arachd[e]+1*gthrd[c]'		'1*cholcoa[r]'	'1*h2o[c]+1*atp[c]+1*lnlc[c]'	'1*h[c]+1*nadh[c]+1*glc_D[c]'	'1*gchola[c]'	'1*hco3[c]+1*gthrd[c]+1*leuktrD4[e]'
'1*pi[c]+1*thm[c]'	'1*ile_L[e]+1*trp_L[c]'	'1*hco3[c]+1*gthrd[c]+1*prostgh2[e]'		'1*chsterol[l]'	'1*h2o[c]+1*atp[c]+1*phyQ[e]'	'1*h[c]+1*nadh[c]+1*mthgxl[c]'	'1*gchola[e]'	'1*hco3[c]+1*gthrd[c]+1*leuktrF4[e]'
'1*ppcoa[c]'	'1*lac_L[e]'	'1*hco3[c]+1*gthrd[c]+1*prostgi2[e]'		'1*chsterol[m]'	'1*h2o[c]+1*atp[c]+1*ps_hs[e]'	'1*h[c]+1*nadph[c]+1*glac[c]'	'1*gdp[c]+1*trdrd[c]'	'1*hco3[e]+1*gthrd[e]+1*leuktrD4[c]'
'1*ppi[c]+1*orot5p[c]'	'1*lys_L[e]'	'1*hco3[c]+1*na1[c]'		'1*cit[c]+1*mal_L[m]'	'1*h2o[c]+1*dgmp[c]'	'1*h[c]+1*nadph[c]+1*glcur[c]'	'1*glc_D[e]'	'1*hco3[e]+1*gthrd[e]+1*leuktrF4[c]'
'1*ppi[e]'	'1*mercplaccys[c]'	'1*hco3[e]+1*arachd[c]+1*gthrd[e]'		'1*cit[c]+1*oxa[m]'	'1*h2o[c]+1*dxtrn[c]'	'1*h[c]+1*nadph[c]+1*trdox[c]'	'1*gln_L[c]'	'1*his_L[e]+1*hom_L[c]'
'1*prpp[c]+1*orot[c]'	'1*mercplaccys[e]'	'1*hco3[e]+1*gthrd[e]+1*prostgh2[c]'		'1*cit[c]+1*pep[m]'	'1*h2o[c]+1*g3pc[c]'	'1*h[c]+1*pep[c]+1*dtdp[c]'	'1*gln_L[c]+1*gly[e]'	'1*hom_L[e]+1*his_L[c]'
'1*pyr[c]+1*acac[e]'	'1*na1[c]+1*asn_L[c]'	'1*hco3[e]+1*gthrd[e]+1*prostgi2[c]'		'1*cit[m]+1*mal_L[c]'	'1*h2o[c]+1*gam6p[c]'	'1*h[m]+1*HC01434[m]'	'1*gln_L[c]+1*leu_L[e]'	'1*ile_L[c]'
'1*pyr[m]+1*atp[m]+1*hco3[m]'	'1*na1[c]+1*dad_2[c]'	'1*hco3[e]+1*na1[e]'		'1*cit[m]+1*oxa[c]'	'1*h2o[c]+1*gdpddman[c]'	'1*h[m]+1*ac[m]'	'1*gln_L[c]+1*phe_L[e]'	'1*inost[e]'
'1*q10[m]+1*dcacoa[m]'	'1*na1[c]+1*glu_L[c]+1*pro_L[e]'	'1*his_L[e]+1*tyr_L[c]'		'1*cmp[c]+1*utp[c]'	'1*h2o[c]+1*leuktrD4[c]'	'1*h[m]+1*h2o[m]+1*1pyr5c[m]'	'1*gln_L[e]'	'1*itp[c]+1*glc_D[c]'
'1*q10h2[m]+1*dc2coa[m]'	'1*na1[c]+1*gly[c]'	'1*hmgcoa[c]'		'1*cmp[n]+1*dgtp[n]'	'1*h2o[c]+1*lpchol_hs[c]'	'1*h[m]+1*nadph[m]+1*HC01434[m]'	'1*gln_L[e]+1*gly[c]'	'1*lgnc[c]'
'1*retinol_9_cis[c]'	'1*na1[c]+1*leu_L[c]'	'1*lys_L[e]+1*btn[e]'		'1*cmp[n]+1*gtp[n]'	'1*h2o[c]+1*nad[c]+1*HC01522[c]'	'1*h[m]+1*nadph[m]+1*dhf[m]'	'1*gln_L[e]+1*leu_L[c]'	'1*lgnc[e]'
'1*retinol_cis_11[c]'	'1*na1[c]+1*met_L[c]'	'1*man[g]+1*m5masnB2[g]'		'1*co2[c]+1*hista[c]'	'1*h2o[c]+1*nad[c]+1*acald[c]'	'1*h[n]+1*adp[n]+1*CE5132[n]'	'1*gln_L[e]+1*phe_L[c]'	'1*lnlnca[c]'
'1*sebacid[c]'	'1*na1[c]+1*taur[c]'	'1*man[g]+1*m6masnA[g]'		'1*co2[c]+1*peamn[c]'	'1*h2o[c]+1*nad[c]+1*hyptaur[c]'	'1*h[n]+1*dcmp[n]+1*udp[n]'	'1*glu5sa[m]'	'1*lpchol_hs[c]'
'1*sebacid[x]'	'1*na1[e]+1*asn_L[e]'	'1*mi1p_D[c]'		'1*co2[m]+1*HC00682[m]'	'1*h2o[c]+1*nadp[c]+1*34dhmald[c]'	'1*hco3[c]+1*ach[e]+1*gthrd[c]'	'1*glu_L[c]+1*3mob[c]'	'1*lpchol_hs[e]'
'1*thf[e]'	'1*na1[e]+1*dad_2[e]'	'1*mmcoa_R[m]'		'1*co2[m]+1*HC01376[m]'	'1*h2o[c]+1*nadp[c]+1*34dhpac[c]'	'1*hco3[c]+1*arachd[e]+1*gthrd[c]'	'1*gly[c]'	'1*lys_L[c]'
'1*thr_L[e]'	'1*na1[e]+1*glu_L[e]+1*pro_L[c]'	'1*na1[c]+1*adrn[c]'		'1*co2[x]'	'1*h2o[c]+1*nadp[c]+1*3m4hpga[c]'	'1*hco3[c]+1*gthrd[c]+1*HC02179[e]'	'1*gly[c]+1*hom_L[e]'	'1*lys_L[c]+1*met_L[e]'
'1*trp_L[c]+1*citr_L[e]'	'1*na1[e]+1*gly[e]'	'1*na1[c]+1*ala_L[c]+1*cys_L[e]'		'1*coa[c]'	'1*h2o[c]+1*nadp[c]+1*6hoxmelatn[c]'	'1*hco3[c]+1*gthrd[c]+1*HC02202[e]'	'1*gly[c]+1*leu_L[e]'	'1*lys_L[e]'
'1*tyr_L[c]+1*citr_L[e]'	'1*na1[e]+1*leu_L[e]'	'1*na1[c]+1*ala_L[c]+1*ser_L[e]'		'1*coa[c]+1*alpa_hs[c]'	'1*h2o[c]+1*nadp[c]+1*retinal[c]'	'1*hco3[c]+1*gthrd[c]+1*HC02203[e]'	'1*gly[c]+1*met_L[e]'	'1*lys_L[e]+1*met_L[c]'
'1*utp[c]+1*f6p[c]'	'1*na1[e]+1*met_L[e]'	'1*na1[c]+1*ala_L[e]+1*gln_L[c]'		'1*coa[c]+1*odecrn[c]'	'1*h2o[c]+1*nadp[c]+1*xol7ah2al[c]'	'1*hco3[c]+1*gthrd[c]+1*HC02204[e]'	'1*gly[c]+1*pro_L[e]'	'1*mal_L[c]+1*HC00342[m]'
'1*xol27oh[m]'	'1*nad[c]'	'1*na1[c]+1*arg_L[e]+1*trp_L[c]'		'1*coa[c]+1*pa_hs[c]'	'1*h2o[c]+1*o2[c]+1*2mop[c]'	'1*hco3[c]+1*gthrd[c]+1*HC02205[e]'	'1*gly[c]+1*trp_L[e]'	'1*mal_L[m]+1*HC00342[c]'
'1*xol27oh[r]'	'1*nad[c]+1*12ppd_S[c]'	'1*na1[c]+1*arg_L[e]+1*tyr_L[c]'		'1*coa[c]+1*pcrn[c]'	'1*h2o[c]+1*o2[c]+1*pyam5p[c]'	'1*hco3[c]+1*gthrd[c]+1*HC02206[e]'	'1*gly[e]+1*hom_L[c]'	'1*met_L[c]+1*val_L[e]'
'1*xoltri27[r]'	'1*nad[c]+1*5mthf[c]'	'1*na1[c]+1*asn_L[c]'		'1*coa[c]+1*tchola[c]'	'1*h2o[c]+1*odecoa[c]'	'1*hco3[c]+1*gthrd[c]+1*HC02207[e]'	'1*gly[e]+1*leu_L[c]'	'1*met_L[e]+1*val_L[c]'
'1*xu5p_D[c]'	'1*nad[c]+1*abt[c]'	'1*na1[c]+1*asn_L[c]+1*thr_L[e]'		'1*coa[m]+1*2aobut[m]'	'1*h2o[c]+1*pail45p_hs[c]'	'1*hco3[c]+1*gthrd[c]+1*HC02208[e]'	'1*gly[e]+1*met_L[c]'	'1*mmcoa_R[m]'
'2*adp[c]+2*h[c]+1*pi[c]+1*glu_L[c]+1*cbp[c]'	'1*nad[c]+1*cys_L[c]+1*mercplac[c]'	'1*na1[c]+1*asn_L[e]+1*ile_L[c]'		'1*coa[m]+1*CE0693[m]'	'1*h2o[c]+1*sph1p[c]'	'1*hco3[c]+1*gthrd[c]+1*HC02210[e]'	'1*gly[e]+1*pro_L[c]'	'1*na1[c]+1*ala_L[c]+1*orn[e]'
'2*h[c]+1*amp[c]+1*r5p[c]'	'1*nad[c]+1*guln[c]'	'1*na1[c]+1*cl[c]+1*taur[c]'		'1*coa[m]+1*CE4792[m]'	'1*h2o[e]'	'1*hco3[c]+1*gthrd[c]+1*HC02213[e]'	'1*gly[e]+1*trp_L[c]'	'1*na1[c]+1*ala_L[c]+1*thr_L[e]'
'2*h[c]+1*nadh[c]+1*mlthf[c]'	'1*nad[c]+1*lac_L[c]'	'1*na1[c]+1*crvnc[c]'		'1*coa[m]+1*HC00682[m]'	'1*h2o[e]+1*pchol_hs[e]'	'1*hco3[c]+1*gthrd[c]+1*HC02214[e]'	'1*gly[m]'	'1*na1[c]+1*ala_L[e]+1*leu_L[c]'
'2*h[c]+1*pi[c]+1*gdp[c]+1*dcamp[c]'	'1*nad[c]+1*lald_L[c]'	'1*na1[c]+1*cys_L[c]+1*citr_L[e]'		'1*coa[m]+1*HC01007[m]'	'1*h2o[e]+1*udp[e]'	'1*hco3[c]+1*gthrd[c]+1*HC02216[e]'	'1*glyc[c]'	'1*na1[c]+1*ala_L[e]+1*thr_L[c]'
'3*o2[r]+3*h[r]+3*nadph[r]+1*44mzym[r]'	'1*nad[c]+1*thbpt[c]'	'1*na1[c]+1*cys_L[c]+1*gly[e]'		'1*coa[m]+1*HC01376[m]'	'1*h2o[e]+1*xolest2_hs[e]'	'1*hco3[c]+1*gthrd[c]+1*HC02217[e]'	'1*glyc[e]'	'1*na1[c]+1*arg_L[e]+1*hom_L[c]'
'4*h2o[r]+3*nadp[r]+1*4mzym_int1[r]'	'1*nad[m]+1*HC01397[m]'	'1*na1[c]+1*gln_L[e]+1*hom_L[c]'		'1*coa[m]+1*HC01408[m]'	'1*h2o[l]+1*6dhf[l]'	'1*hco3[c]+1*gthrd[c]+1*leuktrA4[e]'	'1*guln[c]'	'1*na1[c]+1*arg_L[e]+1*leu_L[c]'
'4*h[m]+4*nadh[m]+4*accoa[m]+3*fadh2[m]+1*occoa[m]'	'1*nad[m]+1*mal_L[m]'	'1*na1[c]+1*gly[c]+1*orn[e]'		'1*coa[m]+1*aacoa[m]'	'1*h2o[l]+1*7dhf[l]'	'1*hco3[c]+1*gthrd[c]+1*leuktrD4[e]'	'1*guln[r]'	'1*na1[c]+1*lys_L[e]+1*hom_L[c]'
'4*na1[c]+1*nh4[e]+1*ca2[e]'	'1*nad[m]+1*pro_L[m]'	'1*na1[c]+1*his_L[e]+1*hom_L[c]'		'1*coa[m]+1*c4crn[m]'	'1*h2o[l]+1*ha[l]'	'1*hco3[c]+1*gthrd[c]+1*leuktrF4[e]'	'1*h2o2[c]+1*xan[c]'	'1*na1[c]+1*lys_L[e]+1*trp_L[c]'
	'1*nad[m]+2*gthrd[m]'	'1*na1[c]+1*his_L[e]+1*tyr_L[c]'		'1*coa[m]+1*co2[m]+1*5aop[m]'	'1*h2o[l]+1*ha_deg1[l]'	'1*hco3[c]+1*gthrd[c]+1*prostgd2[e]'	'1*h2o2[n]+1*o2[n]'	'1*na1[c]+1*met_L[e]+1*pro_L[c]'
	'1*nad[x]'	'1*na1[c]+1*leu_L[e]+1*val_L[c]'		'1*coa[m]+1*gtp[m]+1*succ[m]'	'1*h2o[l]+1*ksi_deg24[l]'	'1*hco3[e]+1*ach[c]+1*gthrd[e]'	'1*h2o[c]+1*23dpg[c]'	'1*na1[c]+1*thr_L[c]'
	'1*nadp[c]+1*12ppd_S[c]'	'1*na1[c]+1*lys_L[c]'		'1*coa[m]+1*ocdececrn[m]'	'1*h2o[l]+1*ksi_deg32[l]'	'1*hco3[e]+1*arachd[c]+1*gthrd[e]'	'1*h2o[c]+1*2425dhvitd3[c]+1*nadp[c]'	'1*na1[e]+1*ala_L[c]+1*leu_L[e]'
	'1*nadp[c]+1*acetol[c]'	'1*na1[c]+1*met_L[c]+1*phe_L[e]'		'1*coa[m]+1*odecrn[m]'	'1*h2o[m]+1*coa[m]+1*nad[m]+1*dc2coa[m]'	'1*hco3[e]+1*gthrd[e]+1*HC02179[c]'	'1*h2o[c]+1*amp[c]'	'1*na1[e]+1*ala_L[c]+1*thr_L[e]'
	'1*nadp[c]+1*mal_L[c]'	'1*na1[c]+1*orn[e]+1*leu_L[c]'		'1*coa[r]'	'1*h2o[m]+1*dd2coa[m]'	'1*hco3[e]+1*gthrd[e]+1*HC02202[c]'	'1*h2o[c]+1*atp[c]+1*asp_L[c]+1*gln_L[c]'	'1*na1[e]+1*ala_L[e]+1*thr_L[c]'
	'1*nadp[c]+1*retinol_9_cis[c]'	'1*na1[c]+1*orn[e]+1*trp_L[c]'		'1*coa[x]+1*3ohdcoa[x]'	'1*h2o[m]+1*mmcoa_S[m]'	'1*hco3[e]+1*gthrd[e]+1*HC02203[c]'	'1*h2o[c]+1*dadp[c]+1*trdox[c]'	'1*na1[e]+1*arg_L[c]+1*hom_L[e]'
	'1*nadp[c]+1*retinol_cis_11[c]'	'1*na1[c]+1*ser_L[c]+1*hom_L[e]'		'1*coa[x]+1*HC01007[x]'	'1*h2o[m]+1*nad[m]+1*2mop[m]'	'1*hco3[e]+1*gthrd[e]+1*HC02204[c]'	'1*h2o[c]+1*dgdp[c]+1*trdox[c]'	'1*na1[e]+1*arg_L[c]+1*leu_L[e]'
	'1*nadph[c]'	'1*na1[c]+1*ser_L[c]+1*tyr_L[e]'		'1*coa[x]+1*acrn[x]'	'1*h2o[m]+1*nadp[m]+1*thcholstoic[m]'	'1*hco3[e]+1*gthrd[e]+1*HC02205[c]'	'1*h2o[c]+1*fum[c]'	'1*na1[e]+1*lys_L[c]+1*hom_L[e]'
	'1*nadph[r]'	'1*na1[c]+1*taur[c]'		'1*coa[x]+1*atp[x]+1*CE2416[x]'	'1*h2o[m]+1*thmpp[m]'	'1*hco3[e]+1*gthrd[e]+1*HC02206[c]'	'1*h2o[c]+1*gly[c]+1*mlthf[c]'	'1*na1[e]+1*lys_L[c]+1*trp_L[e]'
	'1*nh4[c]'	'1*na1[c]+1*tchola[c]'		'1*coa[x]+1*atp[x]+1*phyt[x]'	'1*h2o[n]'	'1*hco3[e]+1*gthrd[e]+1*HC02207[c]'	'1*h2o[c]+1*imp[c]'	'1*na1[e]+1*met_L[c]+1*pro_L[e]'
	'1*nh4[c]+1*atp[c]+1*glu_L[c]'	'1*na1[c]+1*thr_L[c]+1*hom_L[e]'		'1*coa[x]+1*gchola[x]'	'1*h2o[r]+1*HC02023[r]'	'1*hco3[e]+1*gthrd[e]+1*HC02208[c]'	'1*h2o[c]+1*nad[c]+1*lald_L[c]'	'1*na1[e]+1*orn[c]+1*ala_L[e]'
	'1*nh4[c]+1*pyr[c]'	'1*na1[c]+1*thr_L[c]+1*tyr_L[e]'		'1*coa[x]+1*pmtcrn[x]'	'1*h2o[r]+1*nad[r]+1*retinal_cis_13[r]'	'1*hco3[e]+1*gthrd[e]+1*HC02210[c]'	'1*h2o[c]+1*nadp[c]+1*betald[c]'	'1*na1[e]+1*thr_L[e]'
	'1*nh4[m]'	'1*na1[c]+1*thr_L[e]+1*hom_L[c]'		'1*creat[c]'	'1*h2o[r]+1*nadp[r]+1*xoltri27[r]'	'1*hco3[e]+1*gthrd[e]+1*HC02213[c]'	'1*h2o[c]+1*nadp[c]+1*mthgxl[c]'	'1*nac[c]'
	'1*o2[c]+1*h2o2[c]'	'1*na1[c]+1*tyr_L[e]+1*trp_L[c]'		'1*creat[e]'	'1*h2o[x]+1*adpcoa[x]'	'1*hco3[e]+1*gthrd[e]+1*HC02214[c]'	'1*h2o[c]+1*o2[c]+1*hxan[c]'	'1*nad[c]+1*lac_L[c]'
	'1*o2[c]+1*h[c]+1*25hvitd3[c]+1*nadph[c]'	'1*na1[c]+1*val_L[e]+1*leu_L[c]'		'1*crmp_hs[e]'	'1*h2o[x]+1*c12dccoa[x]'	'1*hco3[e]+1*gthrd[e]+1*HC02216[c]'	'1*h2o[c]+1*odecoa[c]'	'1*nad[c]+1*lald_D[c]'
	'1*o2[c]+1*h[c]+1*nadh[c]+1*dhcrm_hs[c]'	'1*na1[e]+1*adrn[e]'		'1*crn[c]+1*HC01007[m]'	'1*h2o[x]+1*phytcoa[x]'	'1*hco3[e]+1*gthrd[e]+1*HC02217[c]'	'1*h2o[c]+1*pgp_hs[c]'	'1*nad[c]+1*mal_L[c]'
	'1*o2[c]+1*h[c]+1*nadph[c]+1*melatn[c]'	'1*na1[e]+1*ala_L[c]+1*gln_L[e]'		'1*crn[c]+1*HC01007[x]'	'1*h[c]+1*5aizc[c]'	'1*hco3[e]+1*gthrd[e]+1*leuktrD4[c]'	'1*h2o[e]+1*co2[e]'	'1*nad[c]+1*xylt[c]'
	'1*o2[c]+1*h[c]+1*nadph[c]+1*xoltetrol[c]'	'1*na1[e]+1*ala_L[e]+1*cys_L[c]'		'1*crn[c]+1*acrn[x]'	'1*h[c]+1*HC01434[c]'	'1*hco3[e]+1*gthrd[e]+1*leuktrF4[c]'	'1*h2o[e]+1*xolest2_hs[e]'	'1*nad[m]+1*HC01401[m]'
	'1*o2[c]+2*13_cis_retn[c]'	'1*na1[e]+1*ala_L[e]+1*ser_L[c]'		'1*crn[c]+1*hdca[r]'	'1*h[c]+1*Rtotal[c]+1*g3pc[c]'	'1*hco3[e]+1*gthrd[e]+1*prostgd2[c]'	'1*h2o[m]+1*2mp2coa[m]'	'1*nad[m]+1*gly[m]+1*thf[m]'
	'1*o2[m]+1*h2o[m]+1*so3[m]'	'1*na1[e]+1*arg_L[c]+1*trp_L[e]'		'1*crn[c]+1*hdcea[r]'	'1*h[c]+1*arg_L[c]+1*orn[m]'	'1*hco3[e]+1*leuktrA4[c]+1*gthrd[e]'	'1*h2o[m]+1*nadp[m]+1*4abutn[m]'	'1*nad[m]+1*icit[m]'
	'1*o2[x]'	'1*na1[e]+1*arg_L[c]+1*tyr_L[e]'		'1*crn[c]+1*ocdcea[r]'	'1*h[c]+1*arg_L[m]+1*his_L[c]'	'1*hdca[c]'	'1*h2o[m]+1*nadp[m]+1*sucsal[m]'	'1*nad[m]+1*mal_L[m]'
	'1*o2[x]+2*h2o[x]'	'1*na1[e]+1*asn_L[c]+1*ile_L[e]'		'1*crn[c]+1*odecoa[c]'	'1*h[c]+1*chol[c]+1*glyc3p[c]'	'1*hdca[e]'	'1*h2o[r]+1*C05957[r]'	'1*nad[x]'
	'1*occoa[x]+1*crn[x]'	'1*na1[e]+1*asn_L[e]'		'1*crn[c]+1*pcrn[x]'	'1*h[c]+1*citr_L[m]+1*his_L[c]'	'1*hdca[l]'	'1*h2o[r]+1*CE4876[r]'	'1*nad[x]+1*coa[x]+1*h2o[x]+1*dd2coa[x]'
	'1*ocdcea[e]'	'1*na1[e]+1*asn_L[e]+1*thr_L[c]'		'1*crn[c]+1*strdnc[r]'	'1*h[c]+1*cmp[c]+1*pchol_hs[c]'	'1*hdcea[c]'	'1*h2o[r]+1*glac[r]'	'1*nadp[c]+1*icit[c]'
	'1*odecrn[c]'	'1*na1[e]+1*cl[e]+1*taur[e]'		'1*crn[m]+1*HC01007[c]'	'1*h[c]+1*coa[c]+1*arach[c]'	'1*hdcea[e]'	'1*h2o[r]+1*nad[r]+1*retinal_cis_13[r]'	'1*nadp[c]+1*sphgn[c]'
	'1*odecrn[m]'	'1*na1[e]+1*crvnc[e]'		'1*crn[m]+1*occoa[m]'	'1*h[c]+1*coa[c]+1*ocdcea[c]'	'1*hdcea[l]'	'1*h[c]+1*3mob[c]'	'1*nadp[m]+1*tdcoa[m]'
	'1*pail45p_hs[c]'	'1*na1[e]+1*cys_L[e]+1*citr_L[c]'		'1*crn[m]+1*octd11ecoa[m]'	'1*h[c]+1*ctp[c]+1*cholp[c]'	'1*his_L[c]'	'1*h[c]+1*ascb_L[c]+1*gthox[c]'	'1*nadp[m]+2*gthrd[m]'
	'1*pail45p_hs[n]'	'1*na1[e]+1*cys_L[e]+1*gly[c]'		'1*crn[m]+1*odecoa[m]'	'1*h[c]+1*gdp[c]+1*man1p[c]'	'1*hom_L[e]+1*trp_L[c]'	'1*h[c]+1*cmp[c]+1*clpn_hs[c]'	'1*nadp[r]+1*chsterol[r]'
	'1*pi[c]+1*amp[c]'	'1*na1[e]+1*gln_L[c]+1*hom_L[e]'		'1*crn[r]'	'1*h[c]+1*glcur[c]'	'1*hretn[c]'	'1*h[c]+1*cmp[c]+1*pchol_hs[c]'	'1*nadp[r]+1*ppi[r]+1*sql[r]'
	'1*pi[c]+1*dgsn[c]'	'1*na1[e]+1*hom_L[e]+1*his_L[c]'		'1*crn[r]+1*hdca[c]'	'1*h[c]+1*idp[c]+1*man6p[c]'	'1*hretn[n]'	'1*h[c]+1*cmp[c]+1*pgp_hs[c]'	'1*nadph[c]+1*akg[c]+1*co2[c]'
	'1*pi[c]+1*glyc3p[m]'	'1*na1[e]+1*leu_L[e]+1*val_L[c]'		'1*crn[r]+1*hdcea[c]'	'1*h[c]+1*na1[e]'	'1*hxan[c]+1*r1p[c]'	'1*h[c]+1*coa[c]+1*dhcrm_hs[c]'	'1*nrpphr[c]'
	'1*pi[c]+1*mthgxl[c]'	'1*na1[e]+1*lys_L[e]'		'1*crn[r]+1*ocdcea[c]'	'1*h[c]+1*na1[e]+1*gly[e]'	'1*icit[c]+1*HC00342[m]'	'1*h[c]+1*coa[c]+1*ocdcea[c]'	'1*nrpphr[e]'
	'1*pi[c]+1*pail4p_hs[c]'	'1*na1[e]+1*met_L[e]+1*phe_L[c]'		'1*crn[r]+1*strdnc[c]'	'1*h[c]+1*nac[c]+1*r1p[c]'	'1*icit[c]+1*oxa[m]'	'1*h[c]+1*ctp[c]+1*cholp[c]'	'1*occoa[c]'
	'1*pi[c]+1*uri[c]'	'1*na1[e]+1*orn[c]+1*gly[e]'		'1*crn[x]+1*HC01007[c]'	'1*h[c]+1*nadh[c]+1*13dpg[c]'	'1*icit[m]'	'1*h[c]+1*glu_L[c]+1*amp[c]+1*ppi[c]+1*asn_L[c]'	'1*orot[c]'
	'1*pi[e]+1*uri[e]'	'1*na1[e]+1*orn[c]+1*leu_L[e]'		'1*crn[x]+1*pcrn[c]'	'1*h[c]+1*nadh[c]+1*dhf[c]'	'1*icit[m]+1*HC00342[c]'	'1*h[c]+1*idp[c]+1*g6p[c]'	'1*pail4p_hs[c]'
	'1*pi[m]+1*glyc3p[c]'	'1*na1[e]+1*orn[c]+1*trp_L[e]'		'1*cys_L[c]+1*ser_L[e]'	'1*h[c]+1*nadh[c]+1*glc_D[c]'	'1*icit[m]+1*oxa[c]'	'1*h[c]+1*lys_L[c]+1*his_L[m]'	'1*pail4p_hs[n]'
	'1*pmtcoa[m]+1*q10[m]'	'1*na1[e]+1*ser_L[e]+1*hom_L[c]'		'1*cys_L[c]+1*trp_L[e]'	'1*h[c]+1*nadh[c]+1*lald_D[c]'	'1*k[c]'	'1*h[c]+1*nadh[c]+1*3dhguln[c]'	'1*pail_hs[n]+1*pi[n]'
	'1*pmtcrn[c]'	'1*na1[e]+1*ser_L[e]+1*tyr_L[c]'		'1*cys_L[c]+1*tyr_L[e]'	'1*h[c]+1*nadh[c]+1*taur[c]'	'1*k[e]'	'1*h[c]+1*nadh[c]+1*CE4872[c]'	'1*pchol_hs[c]+1*crm_hs[c]'
	'1*pmtcrn[m]'	'1*na1[e]+1*tchola[e]'		'1*cys_L[e]'	'1*h[c]+1*nadh[c]+1*xylu_D[c]'	'1*leuktrD4[c]'	'1*h[c]+1*nadh[c]+1*Sfglutth[c]'	'1*pchol_hs[e]'
	'1*ppi[c]+1*cdpchol[c]'	'1*na1[e]+1*thr_L[c]+1*hom_L[e]'		'1*cys_L[e]+1*ser_L[c]'	'1*h[c]+1*nadph[c]+1*CE2243[c]'	'1*leuktrD4[e]'	'1*h[c]+1*nadh[c]+1*lgt_S[c]'	'1*pchol_hs[r]'
	'1*ppi[c]+1*fad[c]'	'1*na1[e]+1*thr_L[e]+1*hom_L[c]'		'1*cys_L[e]+1*trp_L[c]'	'1*h[c]+1*nadph[c]+1*HC01434[c]'	'1*leuktrF4[c]'	'1*h[c]+1*nadh[c]+1*xylu_L[c]'	'1*pe_hs[m]'
	'1*ppi[c]+1*imp[c]'	'1*na1[e]+1*thr_L[e]+1*tyr_L[c]'		'1*cys_L[e]+1*tyr_L[c]'	'1*h[c]+1*nadph[c]+1*dhbpt[c]'	'1*leuktrF4[e]'	'1*h[c]+1*nadph[c]+1*3dsphgn[c]'	'1*phe_L[c]'
	'1*ppi[m]'	'1*na1[e]+1*trp_L[e]+1*tyr_L[c]'		'1*dad_2[c]'	'1*h[c]+1*nadph[c]+1*glc_D[c]'	'1*lgnc[c]'	'1*h[c]+1*nadph[c]+1*retinal_11_cis[c]'	'1*phe_L[e]+1*pro_L[c]'
	'1*ppi[m]+1*dpcoa[m]'	'1*na1[e]+1*tyr_L[e]+1*his_L[c]'		'1*dad_2[e]'	'1*h[c]+1*nadph[c]+1*hpyr[c]'	'1*lgnc[e]'	'1*h[c]+1*pa_hs[c]+1*ctp[c]'	'1*phyQ[c]'
	'1*pro_L[e]+1*trp_L[c]'	'1*na1[e]+1*val_L[e]+1*leu_L[c]'		'1*dadp[n]+1*udp[n]'	'1*h[c]+1*orn[c]+1*his_L[m]'	'1*lnlc[l]'	'1*h[c]+1*prpp[c]+1*ncam[c]'	'1*phyQ[e]'
	'1*prpp[c]+1*hxan[c]'	'1*nad[c]+1*dhf[c]'		'1*datp[c]+1*glc_D[c]'	'1*h[c]+1*thf[c]+1*fgam[c]'	'1*lnlnca[e]'	'1*h[c]+1*ser_L[c]+1*HC00250[c]'	'1*pi[c]+1*akg[m]'
	'1*ps_hs[c]'	'1*nad[c]+1*fadh2[c]'		'1*datp[n]+1*ump[n]'	'1*h[c]+1*thm[e]'	'1*lnlnca[l]'	'1*h[c]+1*ser_L[c]+1*pmtcoa[c]'	'1*pi[c]+1*dag_hs[c]'
	'1*pydam[c]'	'1*nad[c]+1*lald_D[c]'		'1*dcdp[n]+1*adp[n]'	'1*h[e]+1*acac[e]'	'1*lnlncg[l]'	'1*h[c]+1*udp[c]+1*glcur[c]'	'1*pi[c]+1*dgsn[c]'
	'1*pydx5p[e]'	'1*nad[c]+1*ppi[c]'		'1*dctp[n]'	'1*h[e]+1*chsterol[e]+1*Rtotal[e]'	'1*lys_L[e]'	'1*h[e]+1*atp[e]+1*pan4p[e]'	'1*pi[c]+1*glyc3p[m]'
	'1*pydxn[c]'	'1*nad[c]+1*thbpt[c]'		'1*dctp[n]+1*adp[n]'	'1*h[e]+1*lpchol_hs[e]+1*Rtotal2[e]'	'1*mal_L[e]'	'1*h[e]+1*chsterol[e]+1*Rtotal[e]'	'1*pi[c]+1*pail34p_hs[c]'
	'1*pyr[c]+1*co2[c]'	'1*nad[c]+1*xol7ah3[c]'		'1*ddca[c]'	'1*h[e]+1*na1[c]'	'1*met_L[c]+1*phe_L[e]'	'1*h[e]+1*hco3[e]'	'1*pi[c]+1*pglyc_hs[c]'
	'1*pyr[c]+1*ctp[c]'	'1*nad[m]+1*CE2420[m]'		'1*dgchol[e]'	'1*h[e]+1*na1[c]+1*gly[c]'	'1*met_L[c]+1*trp_L[e]'	'1*h[m]+1*3mob[m]'	'1*pi[m]+1*glyc3p[c]'
	'1*pyr[c]+1*nadph[c]+1*co2[c]'	'1*nad[m]+2*gthrd[m]'		'1*dgdp[c]+1*dcdp[c]'	'1*h[e]+1*pi[e]+1*ump[e]'	'1*met_L[c]+1*tyr_L[e]'	'1*h[m]+1*HC01434[m]'	'1*pmtcoa[r]'
	'1*pyr[m]+1*gln_L[m]'	'1*nad[r]+1*g6p[r]'		'1*dgmp[c]'	'1*h[e]+1*thm[c]'	'1*met_L[e]+1*phe_L[c]'	'1*h[m]+1*adp[m]+1*dgmp[m]'	'1*ppi[c]+1*cdpchol[c]'
	'1*retinal_cis_9[r]'	'1*nad[x]+1*HC01403[x]'		'1*dgmp[m]'	'1*h[g]+1*fn2m2masn[g]+1*gdp[g]'	'1*met_L[e]+1*trp_L[c]'	'1*h[m]+1*dgdp[m]+1*dump[m]'	'1*ppi[c]+1*cdpdag_hs[c]'
	'1*retinol_9_cis[e]'	'1*nad[x]+1*coa[x]+1*dcacoa[x]+1*o2[x]+1*h2o[x]'		'1*dgsn[e]'	'1*h[g]+1*pi[g]+1*ump[g]'	'1*met_L[e]+1*tyr_L[c]'	'1*h[m]+1*lys_L[m]+1*his_L[c]'	'1*ppi[c]+1*gmp[c]'
	'1*retinol_cis_11[e]'	'1*nadh[c]+1*fol[c]'		'1*dgtp[c]+1*dcmp[c]'	'1*h[g]+1*udp[g]+1*core5[g]'	'1*mthgxl[e]'	'1*h[m]+1*nadph[m]+1*HC01410[m]'	'1*ppi[c]+1*nicrnt[c]'
	'1*retn[r]'	'1*nadp[c]+1*4hpro_LT[c]'		'1*dgtp[m]+1*duri[m]'	'1*h[g]+1*udp[g]+1*core7[g]'	'1*na1[c]+1*ala_L[e]+1*ser_L[c]'	'1*h[m]+1*nadph[m]+1*HC01434[m]'	'1*ppi[m]+1*dpcoa[m]'
	'1*ser_L[c]+1*ile_L[e]'	'1*nadp[m]+1*dhf[m]'		'1*dhap[c]'	'1*h[g]+1*udp[g]+1*digalside_hs[g]'	'1*na1[c]+1*dcyt[c]'	'1*h[n]+1*adp[n]+1*CE5132[n]'	'1*ppi[n]'
	'1*ser_L[e]+1*ile_L[c]'	'1*nadp[m]+1*xoltetrol[m]'		'1*dhap[c]+1*glyald[c]'	'1*h[g]+1*udp[g]+1*lcts[g]'	'1*na1[c]+1*din[c]'	'1*h[r]'	'1*pristcoa[c]'
	'1*taur[x]+1*na1[x]'	'1*nadp[r]'		'1*dhcholoylcoa[x]+3*h2o[x]+2*nadp[x]'	'1*h[l]+1*glcur[l]'	'1*na1[c]+1*gchola[c]'	'1*h[r]+1*glcur[r]'	'1*pristcoa[x]'
	'1*thr_L[c]'	'1*nadp[r]+1*chsterol[r]'		'1*dhdascb[c]+2*gthrd[c]'	'1*h[l]+1*so4[l]+1*ksi_deg25[l]'	'1*na1[c]+1*leu_L[c]'	'1*h[r]+1*nadph[r]+1*glcur[r]'	'1*pro_L[e]+1*phe_L[c]'
	'1*trp_L[e]+1*hom_L[c]'	'1*nadph[m]+1*fol[m]'		'1*dhf[e]'	'1*h[m]+1*5fthf[m]'	'1*na1[e]+1*ala_L[c]+1*ser_L[e]'	'1*h[r]+1*nadph[r]+1*zymst[r]'	'1*pro_L[e]+1*trp_L[c]'
	'1*trp_L[e]+1*ile_L[c]'	'1*nadph[m]+1*o2[m]+1*thcholst[m]'		'1*didp[c]'	'1*h[m]+1*acetone[m]'	'1*na1[e]+1*dcyt[e]'	'1*h[x]+1*nadh[x]+1*accoa[x]+1*h2o2[x]+1*stcoa[x]'	'1*prpp[c]+1*gua[c]'
	'1*trp_L[e]+1*pro_L[c]'	'1*nh4[c]'		'1*didp[n]'	'1*h[m]+1*arg_L[c]+1*his_L[m]'	'1*na1[e]+1*din[e]'	'1*h[x]+1*nadh[x]+1*accoa[x]+1*pmtcoa[x]+1*h2o2[x]'	'1*q10h2[m]+1*pro_L[m]'
	'1*trp_L[e]+1*tyr_L[c]'	'1*nh4[c]+1*nicrnt[c]'		'1*din[c]'	'1*h[m]+1*citr_L[c]+1*his_L[m]'	'1*na1[e]+1*gchola[e]'	'1*h[x]+1*nadh[x]+1*dhap[x]'	'1*r5p[c]+1*xu5p_D[c]'
	'1*tyr_L[e]+1*trp_L[c]'	'1*nh4[c]+1*uri[c]'		'1*din[e]'	'1*h[m]+1*coa[m]+1*HC00900[m]'	'1*na1[e]+1*leu_L[e]'	'1*hco3[c]+1*ach[e]+1*gthrd[c]'	'1*ser_L[c]+1*pchol_hs[c]'
	'1*udpglcur[c]+1*ump[r]'	'1*nh4[x]'		'1*ditp[c]'	'1*h[m]+1*nadh[m]+1*accoa[m]+1*occoa[m]'	'1*nac[e]'	'1*hco3[c]+1*gthrd[c]+1*HC02179[e]'	'1*ser_L[c]+1*trp_L[e]'
	'1*ump[c]+1*udpglcur[r]'	'1*o2[c]+1*h[c]+1*nadh[c]+1*stcoa[c]'		'1*ditp[n]'	'1*h[m]+1*nadph[m]+1*nad[m]'	'1*nad[c]+1*dhf[c]'	'1*hco3[c]+1*gthrd[c]+1*HC02180[e]'	'1*ser_L[e]+1*trp_L[c]'
	'1*vacc[c]'	'1*o2[r]'		'1*dlnlcg[c]'	'1*h[m]+1*nadph[m]+1*thcholst[m]'	'1*nad[c]+1*sbt_D[c]'	'1*hco3[c]+1*gthrd[c]+1*HC02187[e]'	'1*sphgn[c]+1*Rtotalcoa[c]'
	'1.96*h2o[m]+ 4*h[c]+ 4*ficytC[m]+0.02*o2s[m]'	'1*o2[r]+1*h[r]+1*nadph[r]+1*lthstrl[r]'		'1*dlnlcg[e]'	'1*h[m]+1*orn[c]+1*arg_L[m]'	'1*nadh[c]+1*fol[c]'	'1*hco3[c]+1*gthrd[c]+1*HC02202[e]'	'1*taur[x]'
	'2*13_cis_oretn[c]'	'1*o2[x]'		'1*elaid[c]'	'1*h[m]+1*orn[m]+1*his_L[c]'	'1*nadp[c]+1*gullac[c]'	'1*hco3[c]+1*gthrd[c]+1*HC02203[e]'	'1*tdchola[e]'
	'2*accoa[x]'	'1*pail4p_hs[c]'		'1*estradiol[c]'	'1*h[m]+1*pi[m]+1*thmmp[m]'	'1*nadp[c]+1*guln[c]'	'1*hco3[c]+1*gthrd[c]+1*HC02204[e]'	'1*trp_L[e]+1*pro_L[c]'
	'2*h2o2[x]'	'1*pail4p_hs[n]'		'1*estradiol[r]'	'1*h[m]+1*pyr[m]'	'1*nadp[c]+1*trdrd[c]'	'1*hco3[c]+1*gthrd[c]+1*HC02205[e]'	'1*trp_L[e]+1*tyr_L[c]'
	'2*h2o[c]+1*nad[c]+1*crm_hs[c]'	'1*pe_hs[r]'		'1*estrone[c]'	'1*h[n]+1*dcmp[n]+1*adp[n]'	'1*nadp[m]+1*dhf[m]'	'1*hco3[c]+1*gthrd[c]+1*HC02206[e]'	'1*tyr_L[e]+1*trp_L[c]'
	'2*h2o[c]+1*nad[c]+1*od2coa[c]'	'1*phe_L[c]'		'1*estrone[r]'	'1*h[r]+1*chsterol[r]+1*ocdcea[r]'	'1*nadp[m]+1*thf[m]'	'1*hco3[c]+1*gthrd[c]+1*HC02207[e]'	'1*udpg[c]'
	'2*h2o[e]+1*atp[e]'	'1*phe_L[e]+1*trp_L[c]'		'1*f1p[c]'	'1*h[r]+1*nadph[r]+1*dsmsterol[r]'	'1*nadph[m]+1*fol[m]'	'1*hco3[c]+1*gthrd[c]+1*HC02208[e]'	'1*udpg[c]+1*ump[r]'
	'2*h2o[e]+4*fe3[e]'	'1*pi[c]+1*mal_L[m]'		'1*fad[c]'	'1*h[x]+1*coa[x]+1*adpac[x]'	'1*ncam[e]'	'1*hco3[c]+1*gthrd[c]+1*HC02210[e]'	'1*udpgal[c]+1*ump[g]'
	'2*h[c]+1*nadh[c]+1*34dhoxmand[c]'	'1*pi[c]+1*pail_hs[c]'		'1*fad[c]+1*pro_L[c]'	'1*h[x]+1*coa[x]+1*dodecanac[x]'	'1*nh4[c]+1*cl[c]'	'1*hco3[c]+1*gthrd[c]+1*HC02213[e]'	'1*udpgal[g]+1*ump[c]'
	'2*h[c]+1*nadh[c]+1*34dhpha[c]'	'1*pi[c]+1*ptth[c]'		'1*fad[e]'	'1*h[x]+1*coa[x]+1*phyt[x]'	'1*nh4[c]+1*nicrnt[c]'	'1*hco3[c]+1*gthrd[c]+1*HC02214[e]'	'1*ump[c]+1*udpg[r]'
	'2*h[c]+1*nadh[c]+1*HC00900[c]'	'1*pi[c]+1*xtsn[c]'		'1*fad[m]+1*CE0785[m]'	'1*h[x]+1*nadh[x]+1*accoa[x]+1*dcacoa[x]+1*h2o2[x]'	'1*nh4[e]+1*cl[e]'	'1*hco3[c]+1*gthrd[c]+1*HC02216[e]'	'1*utp[n]+1*adp[n]'
	'2*h[c]+1*nadh[c]+1*ac[c]'	'1*pi[g]'		'1*fad[m]+1*dece4coa[m]'	'1*h[x]+1*nadh[x]+1*accoa[x]+1*ddcacoa[x]+1*h2o2[x]'	'1*no[c]'	'1*hco3[c]+1*gthrd[c]+1*HC02217[e]'	'1*utp[n]+1*dcyt[n]'
	'2*h[c]+1*nadh[c]+1*mlthf[c]'	'1*pi[m]+1*mal_L[c]'		'1*fad[m]+1*q10h2[m]'	'1*ha[l]'	'1*no[e]'	'1*hco3[c]+1*gthrd[c]+1*prostgd2[e]'	'1*xan[c]+1*r1p[c]'
	'2*h[c]+1*nadph[c]+1*34dhoxmand[c]'	'1*pmtcoa[r]'		'1*fad[r]+1*zymstnl[r]'	'1*hco3[c]+1*bildglcur[e]+1*gthrd[c]'	'1*o2[c]+1*h[c]+1*nadph[c]+1*retn[c]'	'1*hco3[c]+1*prostgh2[e]'	'1*zymst[r]+1*fadh2[r]'
	'2*h[c]+1*nadph[c]+1*34dhpha[c]'	'1*pmtcrn[c]+1*crn[r]'		'1*fad[x]'	'1*hco3[c]+1*tchola[e]'	'1*o2[c]+1*pydxn[c]'	'1*hco3[c]+1*prostgi2[e]'	'1.5*na1[e]+ 1*pi[e]'
	'2*h[c]+1*nadph[c]+1*ac[c]'	'1*ppi[c]+1*nicrnt[c]'		'1*fad[x]+1*thcholoylcoa[x]'	'1*hco3[e]+1*bildglcur[c]+1*gthrd[e]'	'1*o2[c]+2*13_cis_retn[c]'	'1*hco3[e]+1*ach[c]+1*gthrd[e]'	'2*adp[c]+2*h[c]+1*pi[c]+1*glu_L[c]+1*cbp[c]'
	'2*h[c]+2*o2s[c]'	'1*pro_L[e]'		'1*fadh2[c]'	'1*hco3[e]+1*tchola[c]'	'1*ocdcea[l]'	'1*hco3[e]+1*gthrd[e]+1*HC02179[c]'	'2*h[r]+1*nadh[r]+1*13_cis_retn[r]'
	'2*h[e]+1*amp[e]+2*pi[e]'	'1*pro_L[e]+1*trp_L[c]'		'1*fadh2[m]+1*CE2432[m]'	'1*hmgcoa[m]'	'1*oretn[n]'	'1*hco3[e]+1*gthrd[e]+1*HC02180[c]'	'2*h[r]+1*nadh[r]+1*CE1617[r]'
	'2*h[m]+1*nadh[m]+1*1pyr5c[m]'	'1*ps_hs[c]'		'1*fadh2[m]+1*dec24dicoa[m]'	'1*ile_L[m]'	'1*orn[c]'	'1*hco3[e]+1*gthrd[e]+1*HC02187[c]'	'2*na1[c]+1*taur[c]'
	'2*h[m]+1*nadh[m]+1*ac[m]'	'1*q10[m]+1*HC01409[m]'		'1*fadh2[m]+1*prpncoa[m]'	'1*lcts[g]'	'1*oxa[c]+1*HC00342[m]'	'1*hco3[e]+1*gthrd[e]+1*HC02202[c]'	'2*na1[e]+1*taur[e]'
	'2*h[m]+2*ficytC[m]+1*q10h2[m]'	'1*q10[m]+1*etfrd[m]'		'1*fadh2[m]+1*q10[m]'	'1*leu_L[e]+1*val_L[c]'	'1*paf_hs[c]'	'1*hco3[e]+1*gthrd[e]+1*HC02203[c]'	'20.6508*adp[c]+20.6508*h[c]+20.6508*pi[c]'
	'2*hco3[c]+1*so4[e]'	'1*q10[m]+1*tdcoa[m]'		'1*fald[c]+1*gthrd[c]'	'1*leuktrA4[c]'	'1*paf_hs[e]'	'1*hco3[e]+1*gthrd[e]+1*HC02204[c]'	'4*h2o[m]+4*coa[m]+4*nad[m]+3*fad[m]+1*hdd2coa[m]'
	'2*hco3[e]+1*so4[c]'	'1*q10h2[m]+1*HC01410[m]'		'1*fol[m]'	'1*leuktrA4[e]'	'1*pd3[c]'	'1*hco3[e]+1*gthrd[e]+1*HC02205[c]'	'5*h[m]+1*q10[m]+1*1pyr5c[m]'
	'2*na1[c]+1*C02528[c]'	'1*q10h2[m]+1*HC01412[m]'		'1*for[c]+1*retn[e]'	'1*lpchol_hs[c]+1*9_cis_retfa[c]'	'1*pe_hs[c]'	'1*hco3[e]+1*gthrd[e]+1*HC02206[c]'
	'2*na1[e]+1*C02528[e]'	'1*q10h2[m]+1*etfox[m]'		'1*for[e]'	'1*lys_L[c]+1*trp_L[e]'	'1*pe_hs[r]'	'1*hco3[e]+1*gthrd[e]+1*HC02207[c]'
	'4*h[c]+1*q10[m]+2*focytC[m]'	'1*r1p[c]'		'1*for[e]+1*retn[c]'	'1*lys_L[e]+1*trp_L[c]'	'1*pglyc_hs[e]'	'1*hco3[e]+1*gthrd[e]+1*HC02208[c]'
	'4*h[e]+4*fe2[e]+1*o2[e]'	'1*r5p[c]'		'1*fprica[c]'	'1*m4mpdol_U[c]'	'1*phytcoa[c]'	'1*hco3[e]+1*gthrd[e]+1*HC02210[c]'
	'4*h[m]+4*nadh[m]+4*accoa[m]+3*fadh2[m]+1*occoa[m]'	'1*retinol_9_cis[e]'		'1*frdp[r]'	'1*m4mpdol_U[r]'	'1*phytcoa[x]'	'1*hco3[e]+1*gthrd[e]+1*HC02213[c]'
	'5*h2o[m]+5*coa[m]+5*nad[m]+4*fad[m]+1*od2coa[m]'	'1*retinol_cis_11[e]'		'1*g3p[c]+1*f6p[c]'	'1*man[c]+1*itp[c]'	'1*pi[c]'	'1*hco3[e]+1*gthrd[e]+1*HC02214[c]'
	'6*h2o[m]+6*coa[m]+6*nad[m]+6*fad[m]+1*tdcoa[m]'	'1*ser_L[c]+1*his_L[e]'		'1*g3p[c]+1*s7p[c]'	'1*met_L[c]+1*orn[e]'	'1*pi[c]+1*pail5p_hs[c]'	'1*hco3[e]+1*gthrd[e]+1*HC02216[c]'
	'6*h[m]+6*nadh[m]+7*accoa[m]+6*fadh2[m]'	'1*ser_L[c]+1*phe_L[e]'		'1*gal[c]'	'1*met_L[c]+1*phe_L[e]'	'1*pi[l]'	'1*hco3[e]+1*gthrd[e]+1*HC02217[c]'
	'7.92*h[m]+ 1*o2[m]+ 4*focytC[m]'	'1*ser_L[c]+1*tyr_L[e]'		'1*gal[l]'	'1*met_L[e]+1*phe_L[c]'	'1*pi[l]+1*dpcoa[l]'	'1*hco3[e]+1*gthrd[e]+1*prostgd2[c]'
		'1*ser_L[e]+1*his_L[c]'		'1*galside_hs[l]+1*gal[l]'	'1*na1[c]+1*ala_L[c]+1*trp_L[e]'	'1*pmtcrn[c]+1*crn[x]'	'1*hco3[e]+1*prostgh2[c]'
		'1*ser_L[e]+1*phe_L[c]'		'1*glc_D[c]'	'1*na1[c]+1*ala_L[e]+1*ile_L[c]'	'1*pnto_R[e]'	'1*hco3[e]+1*prostgi2[c]'
		'1*ser_L[e]+1*tyr_L[c]'		'1*glc_D[r]+1*pi[r]'	'1*na1[c]+1*ala_L[e]+1*phe_L[c]'	'1*ppi[c]+1*gmp[c]'	'1*hdcea[e]'
		'1*so3[c]+1*HC00319[m]'		'1*gln_L[c]+1*pro_L[e]'	'1*na1[c]+1*arg_L[e]+1*met_L[c]'	'1*ppi[c]+1*udpg[c]'	'1*hdcea[l]'
		'1*so3[m]+1*HC00319[c]'		'1*gln_L[c]+1*tyr_L[e]'	'1*na1[c]+1*asn_L[c]'	'1*pristcoa[c]'	'1*his_L[c]'
		'1*sphgn[c]+1*Rtotalcoa[c]'		'1*gln_L[e]+1*pro_L[c]'	'1*na1[c]+1*asn_L[c]+1*arg_L[e]'	'1*pristcoa[x]'	'1*his_L[e]'
		'1*sphs1p[r]'		'1*gln_L[e]+1*tyr_L[c]'	'1*na1[c]+1*asn_L[c]+1*cys_L[e]'	'1*prostgd2[c]'	'1*hom_L[e]+1*phe_L[c]'
		'1*taur[x]+1*na1[x]'		'1*gln_L[m]'	'1*na1[c]+1*cys_L[c]'	'1*prostgd2[e]'	'1*hom_L[e]+1*tyr_L[c]'
		'1*tdchola[e]'		'1*glu5sa[c]'	'1*na1[c]+1*cys_L[c]+1*met_L[e]'	'1*prostgd2[r]'	'1*icit[c]+1*cit[m]'
		'1*thmmp[e]'		'1*glu5sa[m]'	'1*na1[c]+1*cys_L[c]+1*orn[e]'	'1*prostge1[c]'	'1*ile_L[e]+1*trp_L[c]'
		'1*thr_L[c]+1*phe_L[e]'		'1*glu_L[c]+1*ppi[c]+1*pram[c]'	'1*na1[c]+1*cys_L[c]+1*val_L[e]'	'1*prostge1[e]'	'1*ile_L[e]+1*tyr_L[c]'
		'1*thr_L[e]+1*phe_L[c]'		'1*glu_L[c]+1*pro_L[m]'	'1*na1[c]+1*duri[c]'	'1*prpp[c]+1*gua[c]'	'1*inost[e]'
		'1*trp_L[e]'		'1*glu_L[e]'	'1*na1[c]+1*gln_L[c]+1*gly[e]'	'1*ps_hs[e]'	'1*itp[c]+1*glc_D[c]'
		'1*trp_L[e]+1*phe_L[c]'		'1*glu_L[m]+1*pro_L[c]'	'1*na1[c]+1*gln_L[e]+1*met_L[c]'	'1*ptrc[c]'	'1*leuktrC4[c]'
		'1*trp_L[e]+1*pro_L[c]'		'1*glu_L[m]+1*pyr[m]'	'1*na1[c]+1*gly[c]+1*his_L[e]'	'1*ptrc[e]'	'1*leuktrC4[e]'
		'1*trp_L[e]+1*tyr_L[c]'		'1*gly[e]'	'1*na1[c]+1*gly[c]+1*trp_L[e]'	'1*pydam[e]'	'1*leuktrD4[c]'
		'1*tyr_L[e]+1*his_L[c]'		'1*gly[x]+1*cholcoa[x]'	'1*na1[c]+1*gly[e]+1*leu_L[c]'	'1*pydx[e]'	'1*leuktrD4[e]'
		'1*tyr_L[e]+1*trp_L[c]'		'1*glyc3p[c]'	'1*na1[c]+1*gly[e]+1*met_L[c]'	'1*pydxn[e]'	'1*leuktrE4[c]'
		'1*tyr_L[e]+1*val_L[c]'		'1*glyc_S[c]'	'1*na1[c]+1*hdca[c]'	'1*pyr[c]+1*dttp[c]'	'1*leuktrE4[e]'
		'1*udp[c]+1*dcdp[c]'		'1*glyc_S[e]'	'1*na1[c]+1*his_L[e]+1*ile_L[c]'	'1*q10h2[m]+1*pro_L[m]'	'1*leuktrF4[c]'
		'1*udp[g]+1*h2o[g]'		'1*gthrd[e]'	'1*na1[c]+1*ile_L[e]+1*tyr_L[c]'	'1*r5p[c]+1*xu5p_D[c]'	'1*leuktrF4[e]'
		'1*udpg[c]+1*ump[r]'		'1*gullac[c]'	'1*na1[c]+1*lys_L[e]+1*met_L[c]'	'1*retinal[c]'	'1*lgnc[c]'
		'1*udpg[r]'		'1*gullac[r]'	'1*na1[c]+1*met_L[c]'	'1*retinal[r]'	'1*lgnc[e]'
		'1*udpgal[g]+1*crm_hs[g]'		'1*guln[c]'	'1*na1[c]+1*met_L[e]+1*phe_L[c]'	'1*retinal_cis_13[r]'	'1*lnlc[r]'
		'1*ump[c]+1*udpg[r]'		'1*guln[r]'	'1*na1[c]+1*phe_L[e]+1*ile_L[c]'	'1*retinal_cis_9[r]'	'1*lnlnca[e]'
		'1*ura[c]+1*r1p[c]'		'1*h2o2[c]+1*nh4[c]+1*3mldz[c]'	'1*na1[c]+1*pro_L[c]'	'1*retinol[c]'	'1*lnlnca[l]'
		'1*urate[c]'		'1*h2o2[c]+1*nh4[c]+1*pacald[c]'	'1*na1[c]+1*pro_L[e]+1*val_L[c]'	'1*retinol_9_cis[e]'	'1*lnlncg[l]'
		'1*val_L[e]+1*tyr_L[c]'		'1*h2o2[c]+1*pydx5p[c]'	'1*na1[c]+1*ser_L[c]+1*pro_L[e]'	'1*retinol_cis_11[e]'	'1*lnlncg[r]'
		'2*h2o[l]+1*ksi_deg24[l]'		'1*h2o[c]'	'1*na1[c]+1*ser_L[e]+1*leu_L[c]'	'1*retn[e]'	'1*lthstrl[r]'
		'2*h[c]+1*nadh[c]+1*ala_B[c]'		'1*h2o[c]+1*11_cis_retfa[c]'	'1*na1[c]+1*ser_L[e]+1*thr_L[c]'	'1*retn[r]'	'1*lys_L[c]'
		'2*h[c]+1*nadph[c]+1*1p3h5c[c]'		'1*h2o[c]+1*1mncam[c]+1*atp[c]'	'1*na1[c]+1*thr_L[c]+1*his_L[e]'	'1*ribflv[c]'	'1*lys_L[e]'
		'2*h[m]+1*nadh[m]+1*ac[m]'		'1*h2o[c]+1*5fthf[e]'	'1*na1[c]+1*thr_L[c]+1*met_L[e]'	'1*sbt_D[c]'	'1*mal_L[c]'
		'2*h[r]+1*nadh[r]+1*13_cis_retn[r]'		'1*h2o[c]+1*CE2088[c]'	'1*na1[c]+1*trp_L[c]'	'1*sbt_D[e]'	'1*mal_L[e]'
		'2*na1[c]+1*dgchol[c]'		'1*h2o[c]+1*HC00591[c]'	'1*na1[c]+1*trp_L[e]+1*ile_L[c]'	'1*ser_L[c]'	'1*met_L[c]+1*hom_L[e]'
		'2*na1[e]+1*dgchol[e]'		'1*h2o[c]+1*Lfmkynr[c]'	'1*na1[c]+1*val_L[e]+1*pro_L[c]'	'1*ser_L[c]+1*pro_L[e]'	'1*met_L[c]+1*phe_L[e]'
		'3*h[c]+2*nadph[c]+1*malcoa[c]+1*tdcoa[c]'		'1*h2o[c]+1*Lkynr[c]'	'1*na1[e]+1*ala_L[c]+1*ile_L[e]'	'1*ser_L[c]+1*thr_L[e]'	'1*met_L[c]+1*pro_L[e]'
		'4*glu_L[e]+1*thf[e]'		'1*h2o[c]+1*acmanap[c]+1*pep[c]'	'1*na1[e]+1*ala_L[c]+1*phe_L[e]'	'1*ser_L[c]+1*tyr_L[e]'	'1*met_L[e]+1*hom_L[c]'
		'4*h2o[e]+1*5thf[e]'		'1*h2o[c]+1*acnamp[c]'	'1*na1[e]+1*ala_L[e]+1*trp_L[c]'	'1*ser_L[e]+1*pro_L[c]'	'1*met_L[e]+1*phe_L[c]'
		'5*h2o[m]+5*coa[m]+5*nad[m]+4*fad[m]+1*odecoa[m]'		'1*h2o[c]+1*atp[c]+1*HC02175[c]'	'1*na1[e]+1*arg_L[c]+1*met_L[e]'	'1*ser_L[e]+1*thr_L[c]'	'1*met_L[e]+1*pro_L[c]'
				'1*h2o[c]+1*atp[c]+1*HC02198[c]'	'1*na1[e]+1*asn_L[e]'	'1*ser_L[e]+1*tyr_L[c]'	'1*mthgxl[e]'
				'1*h2o[c]+1*atp[c]+1*bildglcur[c]'	'1*na1[e]+1*asn_L[e]+1*arg_L[c]'	'1*ser_L[m]'	'1*na1[c]+1*inost[c]'
				'1*h2o[c]+1*atp[c]+1*cholate[c]'	'1*na1[e]+1*asn_L[e]+1*cys_L[c]'	'1*so3[c]+1*HC00319[m]'	'1*na1[c]+1*pnto_R[c]'
				'1*h2o[c]+1*atp[c]+1*cholcoa[c]'	'1*na1[e]+1*cys_L[e]'	'1*so3[c]+1*succ[m]'	'1*na1[c]+1*thr_L[c]'
				'1*h2o[c]+1*atp[c]+1*ddca[c]'	'1*na1[e]+1*cys_L[e]+1*met_L[c]'	'1*so3[m]+1*HC00319[c]'	'1*na1[e]+1*inost[e]'
				'1*h2o[c]+1*atp[c]+1*dgchol[c]'	'1*na1[e]+1*cys_L[e]+1*val_L[c]'	'1*so3[m]+1*succ[c]'	'1*na1[e]+1*pnto_R[e]'
				'1*h2o[c]+1*atp[c]+1*gchola[c]'	'1*na1[e]+1*duri[e]'	'1*so4[c]+1*HC00319[m]'	'1*na1[e]+1*thr_L[e]'
				'1*h2o[c]+1*atp[c]+1*na1[c]+1*k[e]'	'1*na1[e]+1*gln_L[c]+1*met_L[e]'	'1*so4[c]+1*succ[m]'	'1*nac[e]'
				'1*h2o[c]+1*atp[c]+1*pchol_hs[c]'	'1*na1[e]+1*gln_L[e]+1*gly[c]'	'1*so4[m]+1*HC00319[c]'	'1*nad[c]'
				'1*h2o[c]+1*atp[c]+1*ppcoa[c]'	'1*na1[e]+1*gly[c]+1*leu_L[e]'	'1*spc_hs[e]'	'1*nad[c]+1*guln[c]'
				'1*h2o[c]+1*atp[c]+1*strdnc[c]'	'1*na1[e]+1*gly[c]+1*met_L[e]'	'1*spmd[e]'	'1*nad[c]+1*lald_D[c]+1*gthrd[c]'
				'1*h2o[c]+1*atp[c]+1*tdchola[c]'	'1*na1[e]+1*gly[e]+1*his_L[c]'	'1*strdnc[l]'	'1*nad[c]+1*xoltetrol[c]'
				'1*h2o[c]+1*atp[c]+1*thm[c]'	'1*na1[e]+1*gly[e]+1*trp_L[c]'	'1*succ[c]'	'1*nad[x]'
				'1*h2o[c]+1*atp[c]+1*ttdca[c]'	'1*na1[e]+1*hdca[e]'	'1*succ[c]+1*so4[m]'	'1*nad[x]+1*coa[x]+1*o2[x]+1*h2o[x]+1*arachcoa[x]'
				'1*h2o[c]+1*atp[c]+2*na1[e]+1*ascb_L[e]'	'1*na1[e]+1*ile_L[e]+1*his_L[c]'	'1*succ[x]'	'1*nad[x]+1*coa[x]+1*o2[x]+1*h2o[x]+1*stcoa[x]'
				'1*h2o[c]+1*co2[c]'	'1*na1[e]+1*ile_L[e]+1*phe_L[c]'	'1*tag_hs[c]'	'1*nad[x]+1*glyc3p[x]'
				'1*h2o[c]+1*cyst_L[c]'	'1*na1[e]+1*ile_L[e]+1*trp_L[c]'	'1*tag_hs[e]'	'1*nadp[c]+1*retinol_cis_11[c]'
				'1*h2o[c]+1*dhbpt[c]'	'1*na1[e]+1*lys_L[c]+1*met_L[e]'	'1*tchola[c]'	'1*nadp[c]+1*sphgn[c]'
				'1*h2o[c]+1*dutp[c]'	'1*na1[e]+1*met_L[c]+1*phe_L[e]'	'1*tchola[e]'	'1*nadp[m]+1*HC01409[m]'
				'1*h2o[c]+1*f26bp[c]'	'1*na1[e]+1*met_L[e]'	'1*thbpt4acam[c]'	'1*nadp[m]+1*icit[m]'
				'1*h2o[c]+1*nad[c]+1*3mldz[c]'	'1*na1[e]+1*orn[c]+1*cys_L[e]'	'1*thf[c]'	'1*nadp[r]+1*guln[r]'
				'1*h2o[c]+1*nad[c]+1*5hoxindact[c]'	'1*na1[e]+1*pro_L[e]'	'1*thf[e]'	'1*nadp[r]+1*zymstnl[r]'
				'1*h2o[c]+1*nad[c]+1*CE4872[c]'	'1*na1[e]+1*pro_L[e]+1*val_L[c]'	'1*thf[m]'	'1*nadph[c]'
				'1*h2o[c]+1*nad[c]+1*HC01522[c]'	'1*na1[e]+1*ser_L[c]+1*leu_L[e]'	'1*thf[m]+1*ser_L[m]'	'1*nadph[r]'
				'1*h2o[c]+1*nad[c]+1*pacald[c]'	'1*na1[e]+1*ser_L[c]+1*thr_L[e]'	'1*thymd[e]'	'1*ncam[e]'
				'1*h2o[c]+1*nad[c]+1*xan[c]'	'1*na1[e]+1*ser_L[e]+1*pro_L[c]'	'1*trp_L[e]+1*hom_L[c]'	'1*nh4[c]+1*pyr[c]'
				'1*h2o[c]+1*nadp[c]+1*retinal[c]'	'1*na1[e]+1*thr_L[e]+1*his_L[c]'	'1*ttdca[c]'	'1*no[c]'
				'1*h2o[c]+1*o2[c]+1*mhista[c]'	'1*na1[e]+1*thr_L[e]+1*met_L[c]'	'1*ttdca[e]'	'1*no[e]'
				'1*h2o[c]+1*o2[c]+1*peamn[c]'	'1*na1[e]+1*trp_L[e]'	'1*udpg[c]+1*ump[r]'	'1*o2[c]+1*h[c]+1*25hvitd3[c]+1*nadph[c]'
				'1*h2o[c]+1*o2[c]+1*spmd[c]'	'1*na1[e]+1*tyr_L[e]+1*ile_L[c]'	'1*udpg[r]'	'1*o2[c]+2*retn[c]'
				'1*h2o[c]+1*pail3p_hs[c]'	'1*na1[e]+1*val_L[e]+1*pro_L[c]'	'1*ump[c]'	'1*o2[m]+1*h2o2[m]'
				'1*h2o[c]+1*ppcoa[c]+1*oaa[c]'	'1*nad[c]+1*12ppd_R[c]'	'1*ump[c]+1*udpg[r]'	'1*o2s[m]'
				'1*h2o[c]+1*prpp[c]+1*gln_L[c]'	'1*nad[c]+1*lac_L[c]'	'1*ump[r]'	'1*ocdcea[r]'
				'1*h2o[c]+1*thf[e]'	'1*nad[c]+1*sbt_D[c]'	'1*utp[c]+1*ump[c]'	'1*pail4p_hs[c]'
				'1*h2o[c]+1*thmmp[e]'	'1*nad[c]+1*thf[c]'	'1*utp[n]+1*dcyt[n]'	'1*pail4p_hs[n]'
				'1*h2o[c]+2*atp[c]+1*hco3[c]+1*gln_L[c]'	'1*nad[m]+1*gly[m]+1*thf[m]'	'1*vacc[e]'	'1*pchol_hs[c]+1*crm_hs[c]'
				'1*h2o[e]+1*fad[e]'	'1*nad[x]+1*coa[x]+1*ddcacoa[x]+1*o2[x]+1*h2o[x]'	'1*vitd3[e]'	'1*pd3[c]'
				'1*h2o[e]+1*tag_hs[e]'	'1*nad[x]+1*coa[x]+1*tdcoa[x]+1*o2[x]+1*h2o[x]'	'1*vitd3[m]'	'1*pe_hs[c]'
				'1*h2o[e]+1*thf[c]'	'1*nadh[r]'	'1*xol7aone[c]'	'1*pglyc_hs[c]'
				'1*h2o[e]+1*thmmp[c]'	'1*nadp[c]+1*arachcoa[c]'	'1*xol7aone[r]'	'1*phe_L[e]+1*hom_L[c]'
				'1*h2o[l]+1*digalside_hs[l]'	'1*nadp[c]+1*glyc_R[c]'	'1*xoldiolone[c]'	'1*phe_L[e]+1*trp_L[c]'
				'1*h2o[m]+1*HC01410[m]'	'1*nadp[c]+1*mal_L[c]'	'1*xoldiolone[r]'	'1*phytcoa[c]'
				'1*h2o[m]+1*accoa[m]+1*aacoa[m]'	'1*nadp[c]+1*sbt_D[c]'	'1*xolest2_hs[c]'	'1*phytcoa[x]'
				'1*h2o[m]+1*coa[m]+1*nad[m]+1*2ddecdicoa[m]'	'1*nadp[c]+1*thbpt[c]'	'1*xu5p_D[c]+1*e4p[c]'	'1*pi[c]+1*3pg[c]'
				'1*h2o[m]+1*coa[m]+1*nad[m]+1*fad[m]+1*dcacoa[m]'	'1*nadp[m]+1*h[c]+1*nadh[m]'	'2*13_cis_oretn[c]'	'1*pi[c]+1*HC00319[m]'
				'1*h2o[m]+1*coa[m]+1*nad[m]+1*fad[m]+1*hexddcoa[m]'	'1*nadp[m]+1*xoltetrol[m]'	'2*accoa[c]'	'1*pi[c]+1*adn[c]'
				'1*h2o[m]+1*coa[m]+1*nad[m]+1*fad[m]+1*lnlccoa[m]'	'1*nadph[m]+1*o2[m]+1*thcholst[m]'	'2*h2o[c]+1*gthox[c]'	'1*pi[c]+1*atp[m]'
				'1*h2o[m]+1*coa[m]+1*nad[m]+1*fad[m]+1*tetdecdicoa[m]'	'1*nh4[c]+1*f6p[c]'	'2*h[c]+1*6hoxmelatn[c]'	'1*pi[c]+1*pglyc_hs[c]'
				'1*h2o[m]+1*nad[m]+1*4hglusa[m]'	'1*nh4[c]+1*pyr[c]'	'2*h[c]+2*nadph[c]+1*hmgcoa[c]'	'1*pi[m]+1*HC00319[c]'
				'1*h2o[m]+1*nad[m]+1*acald[m]'	'1*o2[c]+1*h2o2[c]'	'2*h[m]+1*nadh[m]+1*succ[m]'	'1*pi[n]+1*pail34p_hs[n]'
				'1*h2o[m]+1*nad[m]+1*sucsal[m]'	'1*o2[c]+1*h[c]+1*nadh[c]+1*vacccoa[c]'	'2*na1[c]+1*dgchol[c]'	'1*pi[n]+1*pail3p_hs[n]'
				'1*h2o[m]+1*nadp[m]+1*4abutn[m]'	'1*o2[c]+1*h[c]+1*nadph[c]+1*melatn[c]'	'2*na1[e]+1*dgchol[e]'	'1*pi[x]'
				'1*h2o[m]+1*nadp[m]+1*glu_L[m]'	'1*o2[m]+2*h2o[m]'	'2*nadp[c]+1*coa[c]+1*mev_R[c]'	'1*pmtcoa[c]'
				'1*h2o[m]+1*nadp[m]+1*sucsal[m]'	'1*o2[r]+1*h[r]+1*nadph[r]+1*xol27oh[r]'	'2*ru5p_D[c]'	'1*pmtcoa[x]'
				'1*h2o[m]+1*pail45p_hs[m]'	'1*o2s[e]'	'2*udp[c]'	'1*ppcoa[c]+1*crn[c]'
				'1*h2o[r]'	'1*occoa[x]'	'2*xu5p_D[c]'	'1*ppcoa[m]'
				'1*h2o[r]+1*C05957[r]'	'1*ocdcea[c]'	'3*ahcys[r]+3*h[r]+1*pchol_hs[r]'	'1*ppcoa[m]+1*crn[m]'
				'1*h2o[r]+1*CE2053[r]'	'1*orn[c]+1*met_L[e]'	'3*amet[r]+1*pe_hs[r]'	'1*ppi[c]+1*camp[c]'
				'1*h2o[r]+1*CE4876[r]'	'1*oxa[c]+2*so4[e]'	'3*hco3[c]+1*na1[c]'	'1*ppi[c]+1*cdpchol[c]'
				'1*h2o[r]+1*atp[r]+1*chsterol[r]'	'1*oxa[e]+2*so4[c]'	'3*hco3[e]+1*na1[e]'	'1*ppi[c]+1*cdpdag_hs[c]'
				'1*h2o[r]+1*g6p[r]'	'1*pchol_hs[c]+1*crm_hs[c]'	'4*glu_L[e]+1*thf[e]'	'1*ppi[c]+1*nmn[c]'
				'1*h2o[r]+1*glac[r]'	'1*pchol_hs[c]+1*retinol_9_cis[c]'	'4*h2o[e]+1*5thf[e]'	'1*ppi[e]+1*dpcoa[e]'
				'1*h2o[r]+1*nadp[r]+1*CE2056[r]'	'1*phyQ[c]'	'5*h[m]+1*q10[m]+1*1pyr5c[m]'	'1*pristcoa[c]'
				'1*h2o[x]+1*arachdcoa[x]'	'1*phyQ[e]'		'1*pristcoa[x]'
				'1*h2o[x]+1*atp[x]+1*tchola[x]'	'1*pi[c]+1*duri[c]'		'1*prostgd2[c]'
				'1*h2o[x]+1*atp[x]+1*tdchola[x]'	'1*pi[c]+1*f6p[c]'		'1*prostgd2[e]'
				'1*h2o[x]+1*phytcoa[x]'	'1*pi[c]+1*gdpmann[c]'		'1*prostgd2[r]'
				'1*h[c]+1*23dpg[c]'	'1*pi[c]+1*mal_L[m]'		'1*ptrc[c]'
				'1*h[c]+1*2mcit[c]+1*coa[c]'	'1*pi[c]+1*nad[c]+1*g3p[c]'		'1*pydam[e]'
				'1*h[c]+1*HC00342[c]+1*oxa[m]'	'1*pi[c]+1*pail45p_hs[c]'		'1*pydx[e]'
				'1*h[c]+1*Rtotal2[c]+1*retinol_cis_11[c]'	'1*pi[c]+1*sphgn[c]'		'1*pydxn[e]'
				'1*h[c]+1*ahcys[c]+1*mhista[c]'	'1*pi[g]'		'1*pyr[c]+1*acac[m]'
				'1*h[c]+1*ala_L[c]+1*anth[c]'	'1*pi[m]+1*mal_L[c]'		'1*pyr[m]+1*acac[c]'
				'1*h[c]+1*amp[c]+1*ppi[c]+1*4ppcys[c]'	'1*ppi[c]+1*camp[c]'		'1*retinal[r]'
				'1*h[c]+1*arg_L[c]+1*orn[m]'	'1*ppi[c]+1*cdpchol[c]'		'1*retinal_11_cis[c]'
				'1*h[c]+1*arg_L[m]+1*his_L[c]'	'1*ppi[c]+1*gmp[c]'		'1*retinal_cis_13[r]'
				'1*h[c]+1*ascb_L[c]+1*gthox[c]'	'1*ppi[c]+1*imp[c]'		'1*retinal_cis_9[c]'
				'1*h[c]+1*cit[c]'	'1*ppi[m]'		'1*retinol[c]'
				'1*h[c]+1*cmp[c]+1*pail_hs[c]'	'1*ppi[r]+1*HC01118[r]'		'1*retinol[e]'
				'1*h[c]+1*coa[c]+1*CE2088[c]'	'1*pre_prot[r]'		'1*retinol_9_cis[e]'
				'1*h[c]+1*dadp[c]+1*g6p[c]'	'1*pro_L[e]+1*val_L[c]'		'1*retinol_cis_11[e]'
				'1*h[c]+1*dag_hs[c]+1*mi14p[c]'	'1*prpp[c]+1*gua[c]'		'1*retn[c]'
				'1*h[c]+1*fadh2[c]+1*1pyr5c[c]'	'1*prpp[c]+1*hxan[c]'		'1*retn[e]'
				'1*h[c]+1*for[c]+1*Lkynr[c]'	'1*pyr[c]+1*nadph[c]+1*co2[c]'		'1*ribflv[c]'
				'1*h[c]+1*glu_L[c]'	'1*q10[m]+1*HC01409[m]'		'1*ribflv[e]'
				'1*h[c]+1*hco3[c]'	'1*q10h2[m]+1*HC01410[m]'		'1*ser_L[c]+1*ile_L[e]'
				'1*h[c]+1*his_L[m]'	'1*retn[r]'		'1*ser_L[c]+1*phe_L[e]'
				'1*h[c]+1*nadh[c]+1*CE5586[c]'	'1*ser_L[c]+1*his_L[e]'		'1*ser_L[c]+1*thr_L[e]'
				'1*h[c]+1*nadh[c]+1*Sfglutth[c]'	'1*ser_L[e]+1*his_L[c]'		'1*ser_L[e]+1*ile_L[c]'
				'1*h[c]+1*nadh[c]+1*dhbpt[c]'	'1*so3[c]+1*fum[m]'		'1*ser_L[e]+1*phe_L[c]'
				'1*h[c]+1*nadh[c]+1*lald_L[c]'	'1*so3[m]+1*fum[c]'		'1*ser_L[e]+1*thr_L[c]'
				'1*h[c]+1*nadh[c]+1*mercplaccys[c]'	'1*sphs1p[c]'		'1*ser_L[m]'
				'1*h[c]+1*nadh[c]+1*mercppyr[c]'	'1*thr_L[c]+1*citr_L[e]'		'1*so3[c]+1*succ[m]'
				'1*h[c]+1*nadh[c]+1*q10[c]'	'1*thr_L[c]+1*hom_L[e]'		'1*so3[m]+1*succ[c]'
				'1*h[c]+1*nadh[c]+1*urate[c]'	'1*thr_L[e]+1*citr_L[c]'		'1*sphgn[c]+1*Rtotalcoa[c]'
				'1*h[c]+1*nadh[c]+1*xol7ah[c]'	'1*thr_L[e]+1*hom_L[c]'		'1*spmd[c]'
				'1*h[c]+1*nadph[c]+1*acetol[c]'	'1*udp[c]+1*dgdp[c]'		'1*spmd[e]'
				'1*h[c]+1*nadph[c]+1*od2coa[c]'	'1*udp[g]+1*h2o[g]'		'1*strdnc[c]'
				'1*h[c]+1*nadph[c]+1*ura[c]'	'1*udpacgal[g]+1*Tn_antigen[g]'		'1*strdnc[r]'
				'1*h[c]+1*nadph[c]+1*xol7aone[c]'	'1*udpgal[g]+1*galside_hs[g]'		'1*succ[c]+1*HC00342[m]'
				'1*h[c]+1*orn[c]+1*his_L[m]'	'1*udpgal[g]+1*glc_D[g]'		'1*succ[m]+1*HC00342[c]'
				'1*h[c]+1*pep[c]+1*cdp[c]'	'1*udpglcur[c]'		'1*tag_hs[c]'
				'1*h[c]+1*phe_L[m]'	'1*udpglcur[r]'		'1*tag_hs[e]'
				'1*h[c]+1*ppi[c]+1*dump[c]'	'1*val_L[e]+1*leu_L[c]'		'1*tchola[c]'
				'1*h[c]+1*thf[c]+1*fgam[c]'	'1*val_L[e]+1*pro_L[c]'		'1*tchola[e]'
				'1*h[c]+1*udp[c]+1*digalside_hs[c]'	'1*vitd3[c]'		'1*tchola[x]'
				'1*h[e]'	'2*adp[c]'		'1*tdchola[x]'
				'1*h[e]+1*cit[e]'	'2*frdp[r]'		'1*thbpt4acam[c]'
				'1*h[e]+1*dag_hs[e]+1*Rtotal3[e]'	'2*gal[l]+1*ksi_deg6[l]'		'1*thf[c]+1*ser_L[c]'
				'1*h[m]+1*3mop[m]+1*lpam[m]'	'2*h2o2[c]+1*dhdascb[c]'		'1*thr_L[c]+1*met_L[e]'
				'1*h[m]+1*adp[m]+1*glyc3p[m]'	'2*h2o2[m]'		'1*thr_L[e]+1*met_L[c]'
				'1*h[m]+1*adp[m]+1*pail45p_hs[m]'	'2*h2o[c]+1*thmpp[m]'		'1*thymd[e]'
				'1*h[m]+1*adp[m]+1*pi[m]+1*oaa[m]'	'2*h2o[l]+1*ha_pre1[l]'		'1*trp_L[e]+1*ile_L[c]'
				'1*h[m]+1*arg_L[c]+1*his_L[m]'	'2*h2o[l]+1*ksi_deg5[l]'		'1*trp_L[e]+1*phe_L[c]'
				'1*h[m]+1*bhb[m]'	'2*h2o[m]+1*thmpp[c]'		'1*ttdca[c]'
				'1*h[m]+1*coa[m]+1*hmgcoa[m]'	'2*h[c]+1*cgly[c]'		'1*ttdca[e]'
				'1*h[m]+1*dgdp[m]+1*dump[m]'	'2*h[c]+1*nadh[c]+1*HC00460[c]'		'1*tyr_L[e]+1*hom_L[c]'
				'1*h[m]+1*glu_L[m]'	'2*h[c]+1*nadh[c]+1*ac[c]'		'1*tyr_L[e]+1*ile_L[c]'
				'1*h[m]+1*gly[m]+1*succoa[m]'	'2*h[c]+1*nadph[c]+1*34dhoxmand[c]'		'1*udp[c]+1*dgdp[c]'
				'1*h[m]+1*h2o[m]+1*1p3h5c[m]'	'2*h[c]+1*nadph[c]+1*34dhpha[c]'		'1*utp[n]+1*ump[n]'
				'1*h[m]+1*his_L[c]'	'2*h[c]+1*nadph[c]+1*3mox4hoxm[c]'		'1*val_L[e]'
				'1*h[m]+1*nadh[m]+1*3odcoa[m]'	'2*h[c]+1*nadph[c]+1*dhcholestanate[c]'		'1*vitd3[m]'
				'1*h[m]+1*nadh[m]+1*CE0693[m]'	'2*h[c]+1*nadph[c]+1*retn[c]'		'1*xol7aone[c]'
				'1*h[m]+1*nadh[m]+1*CE2422[m]'	'2*h[c]+2*o2s[c]'		'1*xol7aone[r]'
				'1*h[m]+1*nadh[m]+1*HC01408[m]'	'2*h[e]+1*cgly[e]'		'1*xoldiolone[c]'
				'1*h[m]+1*nadh[m]+1*aacoa[m]'	'2*h[g]+2*udp[g]+1*l2fn2m2masn[g]'		'1*xoldiolone[r]'
				'1*h[m]+1*nadh[m]+1*accoa[m]+1*dece4coa[m]'	'2*h[m]+1*nadh[m]+1*HC00900[m]'		'1*xolest2_hs[c]'
				'1*h[m]+1*nadh[m]+1*accoa[m]+1*fadh2[m]+1*3ddecdicoa[m]'	'2*h[m]+2*nadph[m]+1*xol7aone[m]'		'1*xolest2_hs[e]'
				'1*h[m]+1*nadh[m]+1*accoa[m]+1*fadh2[m]+1*hexddcoa[m]'	'2*na1[c]+1*5oxpro[c]'		'1*xu5p_D[c]'
				'1*h[m]+1*nadh[m]+1*accoa[m]+1*fadh2[m]+1*occoa[m]'	'2*na1[c]+1*cl[c]+1*phe_L[c]'		'1*zymstnl[r]'
				'1*h[m]+1*nadh[m]+1*accoa[m]+1*fadh2[m]+1*tetdecdicoa[m]'	'2*na1[c]+1*cl[c]+1*taur[c]'		'2*adp[m]'
				'1*h[m]+1*nadph[m]+1*CE2435[m]'	'2*na1[c]+1*thr_L[c]+1*cl[c]'		'2*h[c]+1*nadh[c]+1*lac_L[c]'
				'1*h[m]+1*nadph[m]+1*akg[m]+1*nh4[m]'	'2*na1[e]+1*5oxpro[e]'		'2*h[c]+1*nadph[c]+1*glyb[c]'
				'1*h[m]+1*nadph[m]+1*dc2coa[m]'	'2*na1[e]+1*cl[e]+1*phe_L[e]'		'2*h[c]+1*pyr[c]+1*nadph[c]'
				'1*h[m]+1*nadph[m]+1*dec24dicoa[m]'	'2*na1[e]+1*cl[e]+1*taur[e]'		'2*h[c]+2*nadph[c]+1*hmgcoa[c]'
				'1*h[m]+1*orn[c]+1*arg_L[m]'	'2*na1[e]+1*thr_L[e]+1*cl[e]'		'2*h[m]+1*nadph[m]+1*4abut[m]'
				'1*h[m]+1*orn[m]+1*his_L[c]'	'2*nadp[m]+1*xol7ah2[m]'		'2*h[m]+1*nadph[m]+1*succ[m]'
				'1*h[m]+1*oxa[c]+1*HC00342[m]'	'2*udpgal[g]+1*fn2m2masn[g]'		'2*h[m]+2*o2s[m]'
				'1*h[m]+1*phe_L[c]'	'3*g1p[c]+1*dxtrn[c]'		'2*h[n]+2*o2s[n]'
				'1*h[m]+1*phe_L[m]'	'3*h2o[c]+3*6pgl[c]'		'2*nadp[c]+1*coa[c]+1*mev_R[c]'
				'1*h[m]+1*pyr[m]+1*lpam[m]'	'3*h[c]+1*ascb_L[c]+2*o2s[c]'		'2*oretn[c]'
				'1*h[n]+1*adp[n]+1*CE5132[n]'	'3*h[c]+3*6pgc[c]'		'2*udp[n]'
				'1*h[r]+1*glcur[r]'	'3*h[c]+3*udp[c]+1*glygn1[c]'		'20.6508*adp[c]+20.6508*h[c]+20.6508*pi[c]'
				'1*h[r]+1*nadh[r]+1*xol7aone[r]'	'3*h[m]+1*h2o[m]+1*atp[m]'
				'1*h[r]+1*nadph[r]+1*HC01118[r]'	'3*hco3[c]+1*na1[c]'
				'1*h[r]+1*nadph[r]+1*andrstandn[r]'	'3*hco3[e]+1*na1[e]'
				'1*h[x]+1*adp[x]+1*pi[x]+1*tchola[e]'	'3*pi[c]+1*glygn2[c]'
				'1*h[x]+1*adp[x]+1*pi[x]+1*tdchola[e]'	'3*udpg[c]+1*ggn[c]'
				'1*h[x]+1*coa[x]+1*arachd[x]'	'4*h[c]+1*adp[m]+1*pi[m]'
				'1*h[x]+1*coa[x]+1*phyt[x]'	'5*h2o[m]+5*coa[m]+5*nad[m]+4*fad[m]+1*odecoa[m]'
				'1*h[x]+1*lac_L[x]'	'7*glc_D[c]+1*Tyr_ggn[c]'
				'1*h[x]+1*nadh[x]+1*3ohdcoa[x]'	'7*h2o[c]+1*glygn3[c]'
				'1*h[x]+1*nadh[x]+1*accoa[x]+1*tdcoa[x]+1*h2o2[x]'	'7*h2o[m]+7*coa[m]+7*nad[m]+7*fad[m]+1*pmtcoa[m]'
				'1*hco3[c]+1*bilirub[e]+1*gthrd[c]'	'7*h[m]+7*nadh[m]+8*accoa[m]+7*fadh2[m]'
				'1*hco3[c]+1*dheas[e]'	'8*h[c]+8*udp[c]+1*ggn[c]'
				'1*hco3[c]+1*estrones[e]'	'8*udpg[c]+1*Tyr_ggn[c]'
				'1*hco3[c]+1*gthrd[c]+1*leuktrA4[e]'	zero-complex
				'1*hco3[c]+1*gthrd[c]+1*leuktrD4[e]'
				'1*hco3[c]+1*prostgh2[e]'
				'1*hco3[c]+1*so4[e]'
				'1*hco3[c]+1*triodthy[e]'
				'1*hco3[e]+1*bilirub[c]+1*gthrd[e]'
				'1*hco3[e]+1*dheas[c]'
				'1*hco3[e]+1*estrones[c]'
				'1*hco3[e]+1*gthrd[e]+1*leuktrD4[c]'
				'1*hco3[e]+1*leuktrA4[c]+1*gthrd[e]'
				'1*hco3[e]+1*prostgh2[c]'
				'1*hco3[e]+1*so4[c]'
				'1*hco3[e]+1*triodthy[c]'
				'1*hdca[l]'
				'1*hdcea[c]'
				'1*hdcea[l]'
				'1*hdd2coa[x]+1*h2o[x]'
				'1*hmgcoa[x]'
				'1*hretn[n]'
				'1*icit[c]+1*akg[x]'
				'1*lac_D[e]'
				'1*lac_L[c]'
				'1*lac_L[x]'
				'1*leuktrB4[c]'
				'1*leuktrB4[e]'
				'1*lnlc[l]'
				'1*lnlccoa[c]'
				'1*lnlccoa[r]'
				'1*lnlnca[e]'
				'1*lnlnca[l]'
				'1*lnlncg[e]'
				'1*lys_L[e]'
				'1*mal_L[e]'
				'1*mercplaccys[c]'
				'1*met_L[c]'
				'1*mthgxl[c]'
				'1*na1[c]+1*ala_L[e]+1*cys_L[c]'
				'1*na1[c]+1*ascb_L[c]'
				'1*na1[c]+1*cys_L[e]+1*ser_L[c]'
				'1*na1[c]+1*duri[c]'
				'1*na1[c]+1*glu_L[c]'
				'1*na1[c]+1*gly[c]'
				'1*na1[c]+1*pnto_R[c]'
				'1*na1[c]+1*ser_L[c]+1*thr_L[e]'
				'1*na1[e]+1*akg[e]'
				'1*na1[e]+1*ala_L[c]+1*cys_L[e]'
				'1*na1[e]+1*ascb_L[e]'
				'1*na1[e]+1*cys_L[c]+1*ser_L[e]'
				'1*na1[e]+1*duri[e]'
				'1*na1[e]+1*glu_L[e]'
				'1*na1[e]+1*gly[e]'
				'1*na1[e]+1*pi[e]'
				'1*na1[e]+1*pnto_R[e]'
				'1*na1[e]+1*ser_L[e]+1*thr_L[c]'
				'1*nac[c]'
				'1*nac[e]'
				'1*nad[c]+1*12ppd_S[c]'
				'1*nad[c]+1*2obut[c]+1*coa[c]'
				'1*nad[c]+1*cys_L[c]+1*mercplac[c]'
				'1*nad[c]+1*dhf[c]'
				'1*nad[c]+1*lald_D[c]'
				'1*nad[c]+1*mercplac[c]'
				'1*nad[c]+1*pro_L[c]'
				'1*nad[c]+1*q10h2[c]'
				'1*nad[c]+1*spmd[c]'
				'1*nad[c]+1*thbpt[c]'
				'1*nad[c]+1*xol7ah2[c]'
				'1*nad[c]+2*glyc_S[c]'
				'1*nad[m]+1*3hbcoa[m]'
				'1*nad[m]+1*CE2418[m]'
				'1*nad[m]+1*CE2420[m]'
				'1*nad[m]+1*HC01403[m]'
				'1*nad[m]+1*HC01407[m]'
				'1*nad[m]+1*icit[m]'
				'1*nad[r]+1*xol27oh[r]'
				'1*nad[x]'
				'1*nad[x]+1*HC01397[x]'
				'1*nad[x]+1*coa[x]+1*pmtcoa[x]+1*o2[x]+1*h2o[x]'
				'1*nadh[c]+1*co2[c]+1*ppcoa[c]'
				'1*nadh[c]+1*fol[c]'
				'1*nadp[c]+1*12ppd_S[c]'
				'1*nadp[c]+1*56dura[c]'
				'1*nadp[c]+1*ascb_L[c]'
				'1*nadp[c]+1*stcoa[c]'
				'1*nadp[c]+1*xol7ah[c]'
				'1*nadp[m]+1*CE5121[m]'
				'1*nadp[m]+1*dcacoa[m]'
				'1*nadp[m]+1*dece3coa[m]'
				'1*nadp[m]+1*dhf[m]'
				'1*nadp[r]+1*ppi[r]+1*sql[r]'
				'1*nadp[x]'
				'1*nadph[c]+1*dhdascb[c]'
				'1*nadph[m]+1*fol[m]'
				'1*nadph[x]'
				'1*ncam[e]'
				'1*nh4[c]+1*akg[c]'
				'1*no[e]'
				'1*o2[c]+1*pdx5p[c]'
				'1*o2[c]+1*trp_L[c]'
				'1*o2[c]+2*13_cis_retn[c]'
				'1*o2[e]'
				'1*o2[m]+2*h2o[m]'
				'1*o2[n]'
				'1*o2[r]+1*h[r]+1*nadph[r]+1*C04853[r]'
				'1*o2[x]'
				'1*o2s[e]'
				'1*o2s[m]'
				'1*occoa[x]+1*crn[x]'
				'1*ocdcea[c]'
				'1*ocdcea[e]'
				'1*ocdcea[l]'
				'1*ocdececrn[c]'
				'1*ocdececrn[m]'
				'1*odecrn[c]'
				'1*odecrn[m]'
				'1*oretn[n]'
				'1*orn[e]'
				'1*orot[c]'
				'1*orot[e]'
				'1*pail45p_hs[c]'
				'1*pail45p_hs[n]'
				'1*pcrn[x]'
				'1*pd3[c]'
				'1*pe_hs[c]'
				'1*pe_hs[r]'
				'1*pep[c]+1*HC00342[m]'
				'1*pep[c]+1*cit[m]'
				'1*pep[m]+1*HC00342[c]'
				'1*pglyc_hs[e]'
				'1*phe_L[e]'
				'1*pheacgln[e]'
				'1*phytcoa[c]'
				'1*phytcoa[x]'
				'1*pi[c]'
				'1*pi[c]+1*acnam[c]'
				'1*pi[c]+1*acnamp[c]'
				'1*pi[c]+1*adn[c]'
				'1*pi[c]+1*inost[c]'
				'1*pi[m]+1*CE5101[m]'
				'1*pi[m]+1*gdp[m]+1*succoa[m]'
				'1*pmtcoa[x]+1*crn[x]'
				'1*ppa[c]+1*lac_L[e]'
				'1*ppa[e]+1*lac_L[c]'
				'1*ppcoa[c]'
				'1*ppcoa[m]+1*fad[m]'
				'1*ppi[n]'
				'1*ppi[r]+1*HC01118[r]'
				'1*ppi[x]'
				'1*pro_L[e]+1*trp_L[c]'
				'1*prostgd2[r]'
				'1*ps_hs[e]'
				'1*pydam[e]'
				'1*pydx[e]'
				'1*pydxn[e]'
				'1*pyr[c]+1*ac[e]'
				'1*pyr[c]+1*akg[e]'
				'1*pyr[c]+1*ctp[c]'
				'1*pyr[c]+1*gln_L[c]'
				'1*pyr[m]+1*3aib_D[m]'
				'1*pyr[m]+1*atp[m]+1*hco3[m]'
				'1*q10[m]+1*dcacoa[m]'
				'1*q10[m]+1*dhor_S[c]'
				'1*q10h2[m]+1*dc2coa[m]'
				'1*q10h2[m]+1*orot[c]'
				'1*r1p[c]'
				'1*r5p[r]'
				'1*retinal[c]'
				'1*retinal_cis_13[r]'
				'1*retinol_9_cis[c]'
				'1*retinol_9_cis[e]'
				'1*retinol_cis_11[e]'
				'1*retn[r]'
				'1*retn[r]+1*udpglcur[r]'
				'1*retnglc[r]'
				'1*sbt_D[c]'
				'1*sbt_D[e]'
				'1*ser_L[c]'
				'1*ser_L[c]+1*phe_L[e]'
				'1*ser_L[e]'
				'1*ser_L[e]+1*phe_L[c]'
				'1*ser_L[m]'
				'1*spc_hs[e]'
				'1*spmd[c]'
				'1*spmd[e]'
				'1*strdnc[c]'
				'1*strdnc[l]'
				'1*succ[c]+1*HC00342[m]'
				'1*succ[m]+1*HC00342[c]'
				'1*taur[c]'
				'1*taur[c]+1*cholcoa[c]'
				'1*tchola[e]'
				'1*thbpt4acam[n]'
				'1*thymd[e]'
				'1*trp_L[e]+1*pro_L[c]'
				'1*trp_L[e]+1*tyr_L[c]'
				'1*ttdca[c]'
				'1*ttdca[e]'
				'1*tyr_L[e]+1*trp_L[c]'
				'1*udp[c]+1*dcdp[c]'
				'1*udp[n]+1*adp[n]'
				'1*udp[r]+1*13_cis_retnglc[r]'
				'1*udp[r]+1*retnglc[r]'
				'1*udpg[c]'
				'1*udpgal[c]+1*g1p[c]'
				'1*udpgal[c]+1*galside_hs[c]'
				'1*vitd3[c]'
				'1*vitd3[e]'
				'1*whhdca[e]'
				'1*xan[c]+1*r1p[c]'
				'1*xoldiolone[c]'
				'1*xoldiolone[r]'
				'1*xu5p_D[c]+1*e4p[c]'
				'1*zymst[r]+1*fadh2[r]'
				'1.96*h2o[m]+ 4*h[c]+ 4*ficytC[m]+0.02*o2s[m]'
				'2*13_cis_oretn[c]'
				'2*accoa[m]'
				'2*adp[c]+2*h[c]+1*pi[c]+1*glu_L[c]+1*cbp[c]'
				'2*frdp[r]'
				'2*h2o2[c]+1*dhdascb[c]'
				'2*h2o2[m]'
				'2*h2o[c]+2*nadp[c]+1*citr_L[c]+1*no[c]'
				'2*h2o[e]+1*atp[e]'
				'2*h[c]+1*nadh[c]+1*1pyr5c[c]'
				'2*h[c]+1*nadh[c]+1*3mlda[c]'
				'2*h[c]+1*nadh[c]+1*5hoxindoa[c]'
				'2*h[c]+1*nadh[c]+1*HC00460[c]'
				'2*h[c]+1*nadh[c]+1*pac[c]'
				'2*h[c]+1*nadh[c]+1*thcholstoic[c]'
				'2*h[c]+1*nadph[c]+1*retn[c]'
				'2*h[c]+2*nadph[c]+1*hmgcoa[c]'
				'2*h[e]+1*amp[e]+1*fmn[e]'
				'2*h[e]+1*amp[e]+2*pi[e]'
				'2*h[m]+1*nadh[m]+1*ac[m]'
				'2*h[m]+1*nadh[m]+1*e4hglu[m]'
				'2*h[m]+1*nadh[m]+1*succ[m]'
				'2*h[m]+1*nadph[m]+1*4abut[m]'
				'2*h[m]+1*nadph[m]+1*succ[m]'
				'2*h[m]+2*ficytC[m]+1*q10h2[m]'
				'2*h[x]+1*o2[x]+1*thcholoylcoa[x]+2*nadph[x]'
				'2*nadp[c]+1*coa[c]+1*mev_R[c]'
				'2*o2[c]+2*nadph[c]+1*arg_L[c]'
				'3*h[c]+1*ascb_L[c]+2*o2s[c]'
				'3*h[c]+1*nadh[c]+2*hpyr[c]'
				'4*h2o[m]+4*coa[m]+4*nad[m]+3*fad[m]+1*hdcoa[m]'
				'4*h[c]+1*q10[m]+2*focytC[m]'
				'4*h[x]+4*nadh[x]+4*accoa[x]+1*occoa[x]+4*h2o2[x]'
				'4*nad[x]+4*coa[x]+1*pmtcoa[x]+4*o2[x]+4*h2o[x]'
				'5*h2o[m]+5*coa[m]+5*nad[m]+4*fad[m]+1*odecoa[m]'
				'7.92*h[m]+ 1*o2[m]+ 4*focytC[m]'
				zero-complex
